# Supplementary material for: Differential correlation analysis of glioblastoma reveals immune ceRNA interactions predictive of patient survival
Source: PubMed Central journal article supplement (PMC5330036; doi:10.1186/s12859-017-1557-4), 2017-02-28

A

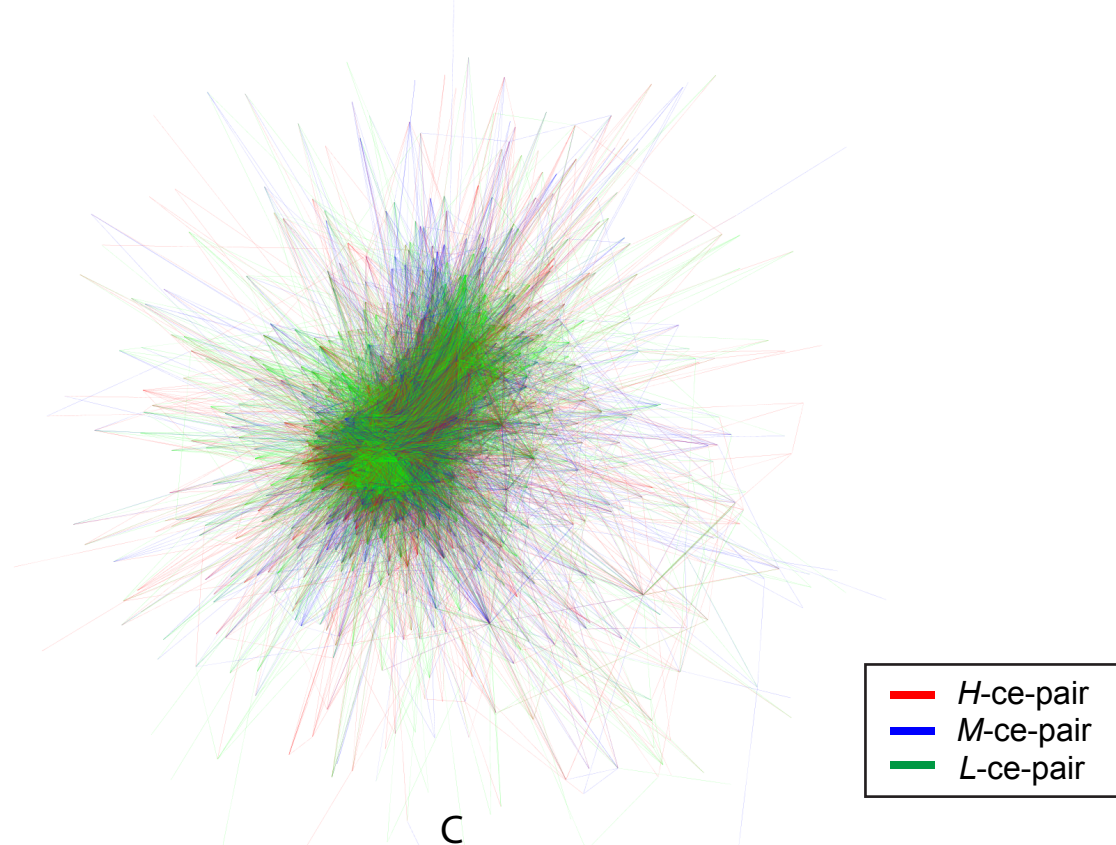

B

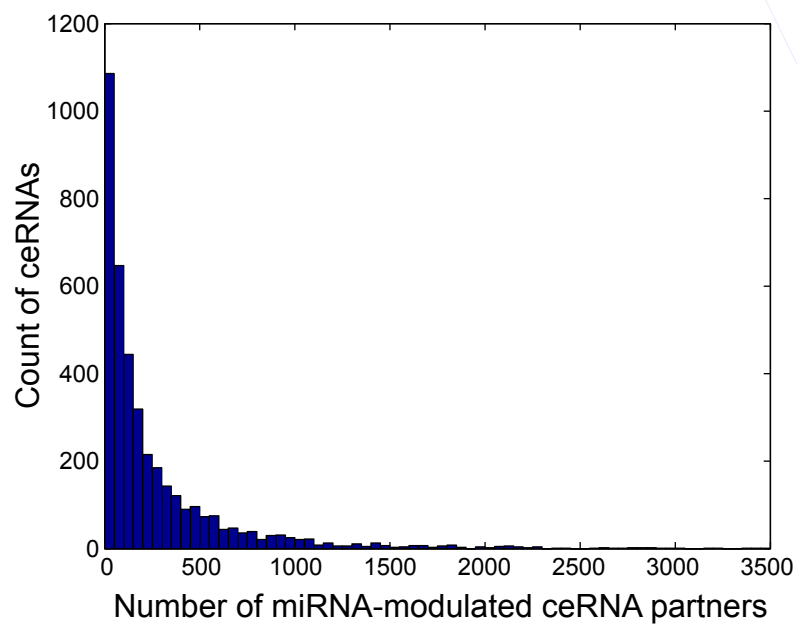

C

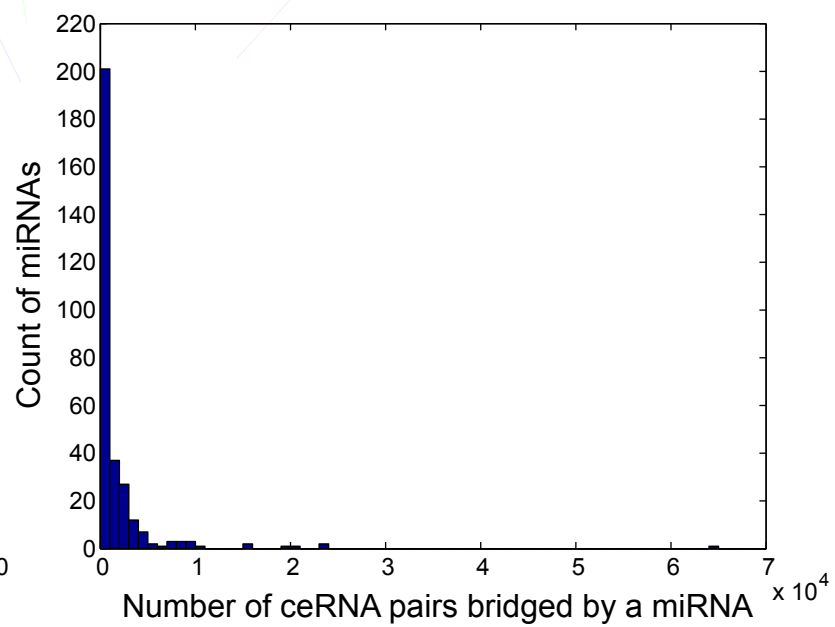

Supplement: 12859_2017_1557_MOESM2_ESM.pdf [file 12859_2017_1557_MOESM2_ESM.pdf]
