# Supplementary material for: Differential correlation analysis of glioblastoma reveals immune ceRNA interactions predictive of patient survival
Source: PubMed Central journal article supplement (PMC5330036; doi:10.1186/s12859-017-1557-4), 2017-02-28
Supplement: 12859_2017_1557_MOESM3_ESM.pdf [file 12859_2017_1557_MOESM3_ESM.pdf]

**Table S1. List of 1,762 core ceRNA pairs**

| <b>ceRNA1</b>   | <b>ceRNA2</b>  | <b>miRNA</b>   | <b>Optimized group</b> |
|-----------------|----------------|----------------|------------------------|
| <i>IRF4</i>     | <i>LTA</i>     | hsa-miR-203    | Low miRNA              |
| <i>CCDC68</i>   | <i>SLC6A14</i> | hsa-miR-340    | Medium miRNA           |
| <i>DAZ1</i>     | <i>DAZ4</i>    | hsa-miR-527    | Low miRNA              |
| <i>CPB2</i>     | <i>CLIC5</i>   | hsa-miR-143    | Medium miRNA           |
| <i>MUC13</i>    | <i>ADIPOQ</i>  | hsa-miR-485-5p | Low miRNA              |
| <i>C1orf116</i> | <i>EHF</i>     | hsa-miR-539    | Low miRNA              |
| <i>TMPRSS4</i>  | <i>KLK10</i>   | hsa-miR-612    | High miRNA             |
| <i>CLIC5</i>    | <i>CCRL1</i>   | hsa-miR-340    | Medium miRNA           |
| <i>STX11</i>    | <i>CLDN18</i>  | hsa-miR-34a    | High miRNA             |
| <i>C1orf116</i> | <i>GPA33</i>   | hsa-miR-147    | Medium miRNA           |
| <i>CCDC68</i>   | <i>CLIC5</i>   | hsa-miR-340    | High miRNA             |
| <i>DSC3</i>     | <i>CEACAM5</i> | hsa-miR-561    | Low miRNA              |
| <i>VGLL3</i>    | <i>SLC6A14</i> | hsa-miR-587    | High miRNA             |
| <i>SV2B</i>     | <i>MYTIL</i>   | hsa-miR-495    | High miRNA             |
| <i>C1orf116</i> | <i>VGLL3</i>   | hsa-miR-369-3p | Medium miRNA           |
| <i>VGLL3</i>    | <i>CLIC5</i>   | hsa-miR-579    | Low miRNA              |
| <i>CLIC5</i>    | <i>OCN</i>     | hsa-miR-340    | Medium miRNA           |
| <i>DAZ1</i>     | <i>DAZ4</i>    | hsa-miR-200b   | Low miRNA              |
| <i>GPM6A</i>    | <i>PMP2</i>    | hsa-miR-369-3p | High miRNA             |
| <i>DAZ1</i>     | <i>DAZ4</i>    | hsa-miR-577    | High miRNA             |
| <i>KIAA1045</i> | <i>KCNS1</i>   | hsa-miR-326    | High miRNA             |
| <i>OCN</i>      | <i>SLC6A14</i> | hsa-miR-340    | Medium miRNA           |
| <i>CLEC2D</i>   | <i>IRF4</i>    | hsa-miR-587    | Medium miRNA           |
| <i>SV2B</i>     | <i>GABRA1</i>  | hsa-miR-203    | High miRNA             |
| <i>VGLL3</i>    | <i>CLIC5</i>   | hsa-miR-340    | Medium miRNA           |
| <i>IRF4</i>     | <i>CCL22</i>   | hsa-miR-34a    | Low miRNA              |
| <i>DAZ1</i>     | <i>DAZ4</i>    | hsa-miR-200c   | High miRNA             |
| <i>FAT2</i>     | <i>PLD1</i>    | hsa-miR-519e   | High miRNA             |
| <i>CCDC68</i>   | <i>LMO7</i>    | hsa-miR-340    | Medium miRNA           |
| <i>BSN</i>      | <i>FBXO41</i>  | hsa-miR-149    | High miRNA             |
| <i>RAB3B</i>    | <i>PKP1</i>    | hsa-miR-558    | High miRNA             |
| <i>IRF4</i>     | <i>CCL22</i>   | hsa-miR-449b   | Medium miRNA           |
| <i>HPCAL4</i>   | <i>SV2B</i>    | hsa-miR-7      | High miRNA             |

|                 |                  |                |              |
|-----------------|------------------|----------------|--------------|
| <i>LAMP3</i>    | <i>RAB11FIP1</i> | hsa-miR-519d   | Medium miRNA |
| <i>MDM4</i>     | <i>PLEKHA6</i>   | hsa-miR-622    | Medium miRNA |
| <i>KIAA1045</i> | <i>CNNM1</i>     | hsa-miR-326    | High miRNA   |
| <i>POU2AF1</i>  | <i>GRHL2</i>     | hsa-miR-766    | Medium miRNA |
| <i>G6PC</i>     | <i>SLC38A4</i>   | hsa-miR-607    | High miRNA   |
| <i>KIAA0513</i> | <i>AAK1</i>      | hsa-miR-485-5p | High miRNA   |
| <i>ADARB2</i>   | <i>SLCO1A2</i>   | hsa-miR-579    | Low miRNA    |
| <i>VGLL3</i>    | <i>AGTR2</i>     | hsa-miR-607    | Medium miRNA |
| <i>SPARC</i>    | <i>TCF4</i>      | hsa-miR-203    | High miRNA   |
| <i>SSBP3</i>    | <i>TRIM3</i>     | hsa-miR-608    | Low miRNA    |
| <i>CEACAM5</i>  | <i>NPR3</i>      | hsa-miR-607    | High miRNA   |
| <i>VGLL3</i>    | <i>CLIC5</i>     | hsa-miR-186    | Low miRNA    |
| <i>GOSR1</i>    | <i>ANKRD12</i>   | hsa-miR-150    | Medium miRNA |
| <i>SSBP3</i>    | <i>ATP6V0A1</i>  | hsa-miR-608    | Low miRNA    |
| <i>OCLN</i>     | <i>TMEM30B</i>   | hsa-miR-561    | Medium miRNA |
| <i>OCLN</i>     | <i>CEACAM5</i>   | hsa-miR-607    | High miRNA   |
| <i>MBNL3</i>    | <i>SLC2A2</i>    | hsa-miR-570    | Low miRNA    |
| <i>CLIC5</i>    | <i>SLC6A14</i>   | hsa-miR-340    | Medium miRNA |
| <i>VGLL3</i>    | <i>TMPRSS2</i>   | hsa-miR-579    | Low miRNA    |
| <i>SV2B</i>     | <i>AAK1</i>      | hsa-miR-136    | High miRNA   |
| <i>FAT2</i>     | <i>PLD1</i>      | hsa-miR-515-3p | Medium miRNA |
| <i>KCNS1</i>    | <i>CHD5</i>      | hsa-miR-149    | High miRNA   |
| <i>RNF4</i>     | <i>PPP3CA</i>    | hsa-miR-495    | Low miRNA    |
| <i>PRRG4</i>    | <i>DSG3</i>      | hsa-miR-607    | High miRNA   |
| <i>STEAP4</i>   | <i>NPR3</i>      | hsa-miR-340    | Low miRNA    |
| <i>PRRG4</i>    | <i>RAB11FIP1</i> | hsa-miR-20a    | Medium miRNA |
| <i>NEFL</i>     | <i>GABRA1</i>    | hsa-miR-203    | High miRNA   |
| <i>CACNG2</i>   | <i>SLC8A2</i>    | hsa-miR-637    | Low miRNA    |
| <i>MDM4</i>     | <i>ETNK2</i>     | hsa-miR-150    | High miRNA   |
| <i>SLC12A5</i>  | <i>DLGAP2</i>    | hsa-miR-25     | Low miRNA    |
| <i>VGLL3</i>    | <i>ADAMTSL3</i>  | hsa-miR-340    | Medium miRNA |
| <i>AAK1</i>     | <i>SCN2A</i>     | hsa-miR-107    | High miRNA   |
| <i>FGD6</i>     | <i>DSG3</i>      | hsa-miR-369-3p | High miRNA   |
| <i>PCSK2</i>    | <i>AAK1</i>      | hsa-miR-203    | High miRNA   |
| <i>PTPRB</i>    | <i>VGLL3</i>     | hsa-miR-23a    | Low miRNA    |
| <i>SLC8A2</i>   | <i>SV2B</i>      | hsa-miR-7      | High miRNA   |

|                 |                  |                |              |
|-----------------|------------------|----------------|--------------|
| <i>STEAP4</i>   | <i>SLC6A14</i>   | hsa-miR-340    | Medium miRNA |
| <i>KCNS1</i>    | <i>CAMK2A</i>    | hsa-miR-326    | High miRNA   |
| <i>LMO7</i>     | <i>SLC6A14</i>   | hsa-miR-105    | Medium miRNA |
| <i>OCN</i>      | <i>CCRL1</i>     | hsa-miR-340    | Medium miRNA |
| <i>SYT11</i>    | <i>GPM6A</i>     | hsa-miR-186    | Medium miRNA |
| <i>SLC8A2</i>   | <i>PAK6</i>      | hsa-miR-185    | High miRNA   |
| <i>PAX1</i>     | <i>COL11A2</i>   | hsa-miR-608    | Medium miRNA |
| <i>IRF4</i>     | <i>IL2RB</i>     | hsa-miR-449b   | Medium miRNA |
| <i>KCNC1</i>    | <i>AAK1</i>      | hsa-miR-203    | High miRNA   |
| <i>KIAA1045</i> | <i>CHD5</i>      | hsa-miR-370    | High miRNA   |
| <i>SERBP1</i>   | <i>PPP3CA</i>    | hsa-miR-495    | Low miRNA    |
| <i>HELZ</i>     | <i>SNX27</i>     | hsa-miR-607    | Low miRNA    |
| <i>KIAA1045</i> | <i>IQSEC3</i>    | hsa-miR-637    | Low miRNA    |
| <i>FAM46C</i>   | <i>FUT1</i>      | hsa-miR-515-5p | High miRNA   |
| <i>STX11</i>    | <i>VGLL3</i>     | hsa-miR-568    | High miRNA   |
| <i>VGLL3</i>    | <i>OCN</i>       | hsa-miR-340    | Medium miRNA |
| <i>KLK10</i>    | <i>PKP1</i>      | hsa-miR-661    | Low miRNA    |
| <i>AAK1</i>     | <i>CAMKV</i>     | hsa-miR-329    | High miRNA   |
| <i>CTSL2</i>    | <i>SERPINB13</i> | hsa-miR-570    | High miRNA   |
| <i>C1orf116</i> | <i>STX11</i>     | hsa-miR-539    | High miRNA   |
| <i>CCDC68</i>   | <i>VGLL3</i>     | hsa-miR-340    | Medium miRNA |
| <i>PAX8</i>     | <i>KCNK15</i>    | hsa-miR-637    | Medium miRNA |
| <i>STX11</i>    | <i>VGLL3</i>     | hsa-miR-494    | Low miRNA    |
| <i>PTPRB</i>    | <i>AGTR2</i>     | hsa-miR-607    | High miRNA   |
| <i>PACS2</i>    | <i>CDC42BPB</i>  | hsa-miR-608    | Low miRNA    |
| <i>SH3TC2</i>   | <i>SEC14L5</i>   | hsa-miR-138    | High miRNA   |
| <i>SLC8A2</i>   | <i>FAIM2</i>     | hsa-miR-7      | High miRNA   |
| <i>VGLL3</i>    | <i>CLIC5</i>     | hsa-miR-511    | Medium miRNA |
| <i>AAK1</i>     | <i>CHD5</i>      | hsa-miR-504    | High miRNA   |
| <i>CCDC68</i>   | <i>AGTR2</i>     | hsa-miR-607    | Medium miRNA |
| <i>NCDN</i>     | <i>SYP</i>       | hsa-miR-608    | Low miRNA    |
| <i>NPR3</i>     | <i>ATP8A1</i>    | hsa-miR-607    | High miRNA   |
| <i>HOOK1</i>    | <i>NPR3</i>      | hsa-miR-607    | High miRNA   |
| <i>CREB1</i>    | <i>LRPPRC</i>    | hsa-miR-607    | Low miRNA    |
| <i>KIAA1045</i> | <i>KIAA0319</i>  | hsa-miR-326    | High miRNA   |
| <i>SLC12A3</i>  | <i>SLC7A2</i>    | hsa-miR-661    | Low miRNA    |

|                 |                 |             |              |
|-----------------|-----------------|-------------|--------------|
| <i>PAX8</i>     | <i>PAX2</i>     | hsa-miR-637 | High miRNA   |
| <i>SLC8A2</i>   | <i>CNNM1</i>    | hsa-miR-608 | Low miRNA    |
| <i>CLIC5</i>    | <i>OCN</i>      | hsa-miR-186 | Low miRNA    |
| <i>FBXO41</i>   | <i>CHD5</i>     | hsa-miR-149 | High miRNA   |
| <i>CHML</i>     | <i>CPT1A</i>    | hsa-miR-579 | High miRNA   |
| <i>TNFRSF1B</i> | <i>EMR2</i>     | hsa-miR-150 | Low miRNA    |
| <i>GPA33</i>    | <i>VGLL3</i>    | hsa-miR-147 | Medium miRNA |
| <i>CEACAM5</i>  | <i>EHF</i>      | hsa-miR-607 | Low miRNA    |
| <i>FGD6</i>     | <i>DSG3</i>     | hsa-miR-607 | High miRNA   |
| <i>STEAP4</i>   | <i>VGLL3</i>    | hsa-miR-656 | Medium miRNA |
| <i>CNTN2</i>    | <i>SH3TC2</i>   | hsa-miR-185 | High miRNA   |
| <i>C1orf116</i> | <i>VGLL3</i>    | hsa-miR-147 | Medium miRNA |
| <i>SLC12A5</i>  | <i>SNCB</i>     | hsa-miR-663 | Low miRNA    |
| <i>FGF7</i>     | <i>DCBLD2</i>   | hsa-miR-340 | High miRNA   |
| <i>KIF5C</i>    | <i>RAP2A</i>    | hsa-miR-186 | Medium miRNA |
| <i>CLCA2</i>    | <i>PRRG4</i>    | hsa-miR-495 | High miRNA   |
| <i>CNTN2</i>    | <i>CLMN</i>     | hsa-miR-185 | High miRNA   |
| <i>KCNS1</i>    | <i>KIAA0319</i> | hsa-miR-326 | High miRNA   |
| <i>KIAA1045</i> | <i>SLC8A2</i>   | hsa-miR-637 | Medium miRNA |
| <i>TNFSF15</i>  | <i>VGLL3</i>    | hsa-miR-570 | Medium miRNA |
| <i>KCNC1</i>    | <i>PCLO</i>     | hsa-miR-203 | High miRNA   |
| <i>KIAA0513</i> | <i>AAK1</i>     | hsa-miR-107 | High miRNA   |
| <i>GALNT6</i>   | <i>ST3GAL1</i>  | hsa-miR-24  | Medium miRNA |
| <i>MAPKAPK2</i> | <i>ARHGDI1</i>  | hsa-miR-637 | Low miRNA    |
| <i>KCNC1</i>    | <i>PCSK2</i>    | hsa-miR-203 | High miRNA   |
| <i>STEAP4</i>   | <i>CCDC68</i>   | hsa-miR-340 | Medium miRNA |
| <i>OCN</i>      | <i>CEACAM5</i>  | hsa-miR-561 | Medium miRNA |
| <i>ADAMTSL3</i> | <i>SLC6A14</i>  | hsa-miR-340 | Medium miRNA |
| <i>SV2B</i>     | <i>FAIM2</i>    | hsa-miR-7   | High miRNA   |
| <i>ARRB1</i>    | <i>VGLL3</i>    | hsa-miR-587 | High miRNA   |
| <i>DSC3</i>     | <i>PRRG4</i>    | hsa-miR-561 | High miRNA   |
| <i>NOS1AP</i>   | <i>PCSK2</i>    | hsa-miR-329 | High miRNA   |
| <i>SV2B</i>     | <i>NRIP3</i>    | hsa-miR-539 | High miRNA   |
| <i>SV2B</i>     | <i>NEFL</i>     | hsa-miR-203 | High miRNA   |
| <i>TRHDE</i>    | <i>AAK1</i>     | hsa-miR-580 | Low miRNA    |
| <i>TRPS1</i>    | <i>CEP68</i>    | hsa-miR-204 | Medium miRNA |

|                  |                 |                |              |
|------------------|-----------------|----------------|--------------|
| <i>AAK1</i>      | <i>CAMK2A</i>   | hsa-miR-485-5p | High miRNA   |
| <i>SLC8A2</i>    | <i>AAK1</i>     | hsa-miR-7      | High miRNA   |
| <i>RASAL1</i>    | <i>SV2B</i>     | hsa-miR-769-5p | High miRNA   |
| <i>LMO7</i>      | <i>ADAMTSL3</i> | hsa-miR-340    | Medium miRNA |
| <i>OSBPL2</i>    | <i>SERINC1</i>  | hsa-miR-607    | Low miRNA    |
| <i>PAQR5</i>     | <i>VGLL3</i>    | hsa-miR-607    | High miRNA   |
| <i>RAB6B</i>     | <i>AAK1</i>     | hsa-miR-485-5p | High miRNA   |
| <i>RAB11FIP1</i> | <i>KLRD1</i>    | hsa-miR-519d   | Medium miRNA |
| <i>CEACAM5</i>   | <i>SLC38A4</i>  | hsa-miR-607    | Low miRNA    |
| <i>CBX5</i>      | <i>MAP1B</i>    | hsa-miR-616    | High miRNA   |
| <i>SSR1</i>      | <i>RAP2C</i>    | hsa-miR-607    | Low miRNA    |
| <i>POU2AF1</i>   | <i>LTA</i>      | hsa-miR-203    | Low miRNA    |
| <i>FBXO41</i>    | <i>KIAA0319</i> | hsa-miR-326    | High miRNA   |
| <i>KIAA1045</i>  | <i>FBXO41</i>   | hsa-miR-326    | High miRNA   |
| <i>FBXO41</i>    | <i>AAK1</i>     | hsa-miR-149    | High miRNA   |
| <i>KCNS1</i>     | <i>AAK1</i>     | hsa-miR-433    | High miRNA   |
| <i>SLC38A4</i>   | <i>EHF</i>      | hsa-miR-607    | Low miRNA    |
| <i>CACNG2</i>    | <i>CNNM1</i>    | hsa-miR-608    | Low miRNA    |
| <i>AAK1</i>      | <i>AKAP11</i>   | hsa-miR-329    | High miRNA   |
| <i>DAZ1</i>      | <i>DAZ4</i>     | hsa-miR-561    | High miRNA   |
| <i>TNFRSF13B</i> | <i>MS4A1</i>    | hsa-miR-593    | High miRNA   |
| <i>CYB5B</i>     | <i>RAB14</i>    | hsa-miR-577    | Low miRNA    |
| <i>ICK</i>       | <i>ZEB2</i>     | hsa-miR-607    | Low miRNA    |
| <i>RAB3B</i>     | <i>DSG3</i>     | hsa-miR-580    | High miRNA   |
| <i>KIF1B</i>     | <i>PMP2</i>     | hsa-miR-599    | High miRNA   |
| <i>SNX27</i>     | <i>ATRN</i>     | hsa-miR-607    | Low miRNA    |
| <i>SCN9A</i>     | <i>DSG3</i>     | hsa-miR-607    | High miRNA   |
| <i>PCLO</i>      | <i>CNTNAP2</i>  | hsa-miR-218    | High miRNA   |
| <i>TBL1XR1</i>   | <i>PIP4K2B</i>  | hsa-miR-105    | Low miRNA    |
| <i>LMO7</i>      | <i>SLC6A14</i>  | hsa-miR-340    | Medium miRNA |
| <i>ZBTB38</i>    | <i>ARL4C</i>    | hsa-miR-101    | Medium miRNA |
| <i>GOSR2</i>     | <i>LARP4</i>    | hsa-miR-603    | Low miRNA    |
| <i>GABRA1</i>    | <i>PCLO</i>     | hsa-miR-203    | High miRNA   |
| <i>CREB1</i>     | <i>TOMM70A</i>  | hsa-miR-607    | Low miRNA    |
| <i>SV2B</i>      | <i>AAK1</i>     | hsa-miR-7      | High miRNA   |
| <i>SERPINB13</i> | <i>SLC6A14</i>  | hsa-miR-340    | Low miRNA    |

|                 |                |                |              |
|-----------------|----------------|----------------|--------------|
| <i>FGF7</i>     | <i>FAM46C</i>  | hsa-miR-607    | Low miRNA    |
| <i>STX11</i>    | <i>CLDN18</i>  | hsa-miR-495    | Medium miRNA |
| <i>NCDN</i>     | <i>CNNM1</i>   | hsa-miR-608    | Low miRNA    |
| <i>SH3TC2</i>   | <i>CLMN</i>    | hsa-miR-185    | High miRNA   |
| <i>NCDN</i>     | <i>IQSEC3</i>  | hsa-miR-637    | Low miRNA    |
| <i>SNPH</i>     | <i>AAK1</i>    | hsa-miR-485-5p | High miRNA   |
| <i>SGPP1</i>    | <i>KPNA4</i>   | hsa-miR-561    | Low miRNA    |
| <i>ITGAM</i>    | <i>PTPRC</i>   | hsa-miR-603    | Low miRNA    |
| <i>MBNL3</i>    | <i>SLC38A4</i> | hsa-miR-607    | High miRNA   |
| <i>CCDC68</i>   | <i>FMO2</i>    | hsa-miR-340    | Medium miRNA |
| <i>CACNG2</i>   | <i>AAK1</i>    | hsa-miR-578    | Low miRNA    |
| <i>STEAP4</i>   | <i>VGLL3</i>   | hsa-miR-369-3p | Low miRNA    |
| <i>OCLN</i>     | <i>FBN1</i>    | hsa-miR-488    | High miRNA   |
| <i>CLDN1</i>    | <i>CLIC5</i>   | hsa-miR-186    | Low miRNA    |
| <i>PAFAH1B1</i> | <i>SSR1</i>    | hsa-miR-603    | Low miRNA    |
| <i>RAB3B</i>    | <i>FGD6</i>    | hsa-miR-186    | Medium miRNA |
| <i>CEACAM5</i>  | <i>TMEM30B</i> | hsa-miR-607    | High miRNA   |
| <i>BSN</i>      | <i>DLGAP2</i>  | hsa-miR-539    | High miRNA   |
| <i>CACNG2</i>   | <i>HECW1</i>   | hsa-miR-578    | Low miRNA    |
| <i>ARRB1</i>    | <i>SLC34A2</i> | hsa-miR-637    | Low miRNA    |
| <i>WDFY3</i>    | <i>ATRN</i>    | hsa-miR-544    | Low miRNA    |
| <i>NRIP3</i>    | <i>CAMK2A</i>  | hsa-miR-485-5p | High miRNA   |
| <i>PAX8</i>     | <i>CLIC5</i>   | hsa-miR-511    | Low miRNA    |
| <i>NR4A3</i>    | <i>STEAP4</i>  | hsa-miR-641    | High miRNA   |
| <i>BSN</i>      | <i>PAK6</i>    | hsa-miR-185    | High miRNA   |
| <i>KIAA1045</i> | <i>GRIN2A</i>  | hsa-miR-326    | High miRNA   |
| <i>CANX</i>     | <i>CUL3</i>    | hsa-miR-186    | Medium miRNA |
| <i>HELZ</i>     | <i>NIPBL</i>   | hsa-miR-544    | Low miRNA    |
| <i>ADAMTSL3</i> | <i>KCNJ13</i>  | hsa-miR-340    | Low miRNA    |
| <i>RUNX3</i>    | <i>RAC2</i>    | hsa-miR-608    | Medium miRNA |
| <i>STX11</i>    | <i>VGLL3</i>   | hsa-miR-559    | Medium miRNA |
| <i>SYNGR3</i>   | <i>SLC17A7</i> | hsa-miR-185    | High miRNA   |
| <i>KPNA4</i>    | <i>MAP3K2</i>  | hsa-miR-607    | Low miRNA    |
| <i>RASGRF1</i>  | <i>STX11</i>   | hsa-miR-661    | Medium miRNA |
| <i>ZMIZ1</i>    | <i>TSC1</i>    | hsa-miR-637    | Low miRNA    |
| <i>OSBPL2</i>   | <i>AKAP11</i>  | hsa-miR-607    | Low miRNA    |

|                 |                |                |              |
|-----------------|----------------|----------------|--------------|
| <i>KIAA1045</i> | <i>CACNB4</i>  | hsa-miR-218    | High miRNA   |
| <i>MEF2C</i>    | <i>SV2B</i>    | hsa-miR-203    | High miRNA   |
| <i>GIPC2</i>    | <i>EHF</i>     | hsa-miR-607    | Low miRNA    |
| <i>CLEC2D</i>   | <i>SLC38A4</i> | hsa-miR-607    | High miRNA   |
| <i>ATXN1</i>    | <i>TCF4</i>    | hsa-miR-203    | High miRNA   |
| <i>ALDH1A2</i>  | <i>GFRA1</i>   | hsa-miR-542-3p | High miRNA   |
| <i>MDM4</i>     | <i>ETNK2</i>   | hsa-miR-608    | High miRNA   |
| <i>NCDN</i>     | <i>SLC8A2</i>  | hsa-miR-637    | Low miRNA    |
| <i>SV2B</i>     | <i>CACNB4</i>  | hsa-miR-7      | High miRNA   |
| <i>UBTF</i>     | <i>SSBP3</i>   | hsa-miR-608    | Low miRNA    |
| <i>VPS24</i>    | <i>ACTR2</i>   | hsa-miR-495    | Low miRNA    |
| <i>UBE4B</i>    | <i>ASB1</i>    | hsa-miR-607    | Low miRNA    |
| <i>CLCN4</i>    | <i>UBE4B</i>   | hsa-miR-607    | Low miRNA    |
| <i>RAB5B</i>    | <i>PIP5K1C</i> | hsa-miR-661    | Low miRNA    |
| <i>PRPF40A</i>  | <i>UBE2G1</i>  | hsa-miR-539    | Low miRNA    |
| <i>EREG</i>     | <i>CPA4</i>    | hsa-miR-769-5p | Medium miRNA |
| <i>DDX3Y</i>    | <i>NLGN4Y</i>  | hsa-miR-561    | Low miRNA    |
| <i>APPL1</i>    | <i>ICK</i>     | hsa-miR-607    | Low miRNA    |
| <i>NR4A3</i>    | <i>CLIC5</i>   | hsa-miR-641    | High miRNA   |
| <i>ATP2B4</i>   | <i>ZC3H11A</i> | hsa-miR-186    | Medium miRNA |
| <i>PAFAH1B1</i> | <i>JHDM1D</i>  | hsa-miR-600    | Low miRNA    |
| <i>KCNJ12</i>   | <i>TRPM8</i>   | hsa-miR-603    | Low miRNA    |
| <i>SV2B</i>     | <i>NRIP3</i>   | hsa-miR-485-5p | High miRNA   |
| <i>MEF2C</i>    | <i>GABRA1</i>  | hsa-miR-203    | High miRNA   |
| <i>BSN</i>      | <i>CHD5</i>    | hsa-miR-149    | High miRNA   |
| <i>PAK6</i>     | <i>SLC17A7</i> | hsa-miR-185    | High miRNA   |
| <i>PRPF4B</i>   | <i>ASB1</i>    | hsa-miR-607    | Low miRNA    |
| <i>SSR1</i>     | <i>C12orf5</i> | hsa-miR-603    | Low miRNA    |
| <i>MEOX1</i>    | <i>PAX2</i>    | hsa-miR-765    | Low miRNA    |
| <i>SLC8A2</i>   | <i>IQSEC3</i>  | hsa-miR-637    | Low miRNA    |
| <i>BSN</i>      | <i>SYP</i>     | hsa-miR-608    | Low miRNA    |
| <i>KCNC1</i>    | <i>AAK1</i>    | hsa-miR-605    | Low miRNA    |
| <i>UBE4A</i>    | <i>TCF4</i>    | hsa-miR-142-5p | High miRNA   |
| <i>STYK1</i>    | <i>DSG3</i>    | hsa-miR-204    | Low miRNA    |
| <i>GIMAP6</i>   | <i>RAC2</i>    | hsa-miR-608    | Low miRNA    |
| <i>IRF4</i>     | <i>CLDN18</i>  | hsa-miR-34a    | Medium miRNA |

|                 |                |                |              |
|-----------------|----------------|----------------|--------------|
| <i>PPM1F</i>    | <i>PIP5K1C</i> | hsa-miR-608    | Low miRNA    |
| <i>PRRG4</i>    | <i>FGD6</i>    | hsa-miR-607    | Medium miRNA |
| <i>KCNC1</i>    | <i>FBXO41</i>  | hsa-miR-149    | High miRNA   |
| <i>BSN</i>      | <i>KCNS1</i>   | hsa-miR-149    | High miRNA   |
| <i>CCDC68</i>   | <i>OCN</i>     | hsa-miR-340    | Medium miRNA |
| <i>TRIM33</i>   | <i>TCF4</i>    | hsa-miR-629    | Low miRNA    |
| <i>APC</i>      | <i>CTNND2</i>  | hsa-miR-561    | High miRNA   |
| <i>MCTP2</i>    | <i>LGALS8</i>  | hsa-miR-607    | Medium miRNA |
| <i>SV2B</i>     | <i>AAK1</i>    | hsa-miR-495    | High miRNA   |
| <i>COL4A4</i>   | <i>CCDC68</i>  | hsa-miR-340    | Medium miRNA |
| <i>AGPS</i>     | <i>KPNA4</i>   | hsa-miR-607    | Low miRNA    |
| <i>TCF4</i>     | <i>SOBP</i>    | hsa-miR-579    | High miRNA   |
| <i>DSC3</i>     | <i>SLC6A14</i> | hsa-miR-105    | Low miRNA    |
| <i>CLDN18</i>   | <i>CLIC5</i>   | hsa-miR-659    | Low miRNA    |
| <i>HELZ</i>     | <i>ARHGAP5</i> | hsa-miR-607    | Low miRNA    |
| <i>PTPRB</i>    | <i>CLIC5</i>   | hsa-miR-579    | High miRNA   |
| <i>SV2B</i>     | <i>RAB6B</i>   | hsa-miR-485-5p | High miRNA   |
| <i>ARRB1</i>    | <i>CCL21</i>   | hsa-miR-608    | Low miRNA    |
| <i>PAFAH1B1</i> | <i>GSPT1</i>   | hsa-miR-603    | Low miRNA    |
| <i>CLIC5</i>    | <i>LMO7</i>    | hsa-miR-340    | Medium miRNA |
| <i>LPHN1</i>    | <i>TRPS1</i>   | hsa-miR-204    | High miRNA   |
| <i>PKP1</i>     | <i>EPN3</i>    | hsa-miR-661    | Medium miRNA |
| <i>TBL1XR1</i>  | <i>KPNA6</i>   | hsa-miR-570    | Low miRNA    |
| <i>ICK</i>      | <i>ASB1</i>    | hsa-miR-607    | Low miRNA    |
| <i>NEFL</i>     | <i>PCSK2</i>   | hsa-miR-203    | High miRNA   |
| <i>RAB11A</i>   | <i>SSR1</i>    | hsa-miR-520h   | Low miRNA    |
| <i>SYNGR3</i>   | <i>BSN</i>     | hsa-miR-185    | High miRNA   |
| <i>SEC16A</i>   | <i>GOSR1</i>   | hsa-miR-106a   | Low miRNA    |
| <i>SEC16A</i>   | <i>GOSR1</i>   | hsa-miR-20b    | Low miRNA    |
| <i>TARDBP</i>   | <i>SNX27</i>   | hsa-miR-607    | Low miRNA    |
| <i>RAP2B</i>    | <i>TM9SF3</i>  | hsa-miR-142-5p | High miRNA   |
| <i>BSN</i>      | <i>FBXO41</i>  | hsa-miR-185    | High miRNA   |
| <i>APPL1</i>    | <i>ARHGAP5</i> | hsa-miR-607    | Low miRNA    |
| <i>HPCAL4</i>   | <i>AAK1</i>    | hsa-miR-7      | High miRNA   |
| <i>KCNC1</i>    | <i>NEFL</i>    | hsa-miR-203    | High miRNA   |
| <i>SNX19</i>    | <i>ARHGAP5</i> | hsa-miR-607    | Low miRNA    |



|                 |                  |                |              |
|-----------------|------------------|----------------|--------------|
| <i>CYLD</i>     | <i>NANOS1</i>    | hsa-miR-544    | Low miRNA    |
| <i>TBL1XR1</i>  | <i>KPNA4</i>     | hsa-miR-570    | Low miRNA    |
| <i>ARHGAP5</i>  | <i>PTPN11</i>    | hsa-miR-607    | Low miRNA    |
| <i>STXBP5L</i>  | <i>GRIN2A</i>    | hsa-miR-105    | Low miRNA    |
| <i>NCDN</i>     | <i>SLC8A2</i>    | hsa-miR-608    | Low miRNA    |
| <i>SCN3B</i>    | <i>KIAA0513</i>  | hsa-miR-485-5p | High miRNA   |
| <i>TRAF1</i>    | <i>IL2RB</i>     | hsa-miR-214    | Low miRNA    |
| <i>LAMP3</i>    | <i>RAB11FIP1</i> | hsa-miR-93     | High miRNA   |
| <i>BSN</i>      | <i>FBXO41</i>    | hsa-miR-326    | High miRNA   |
| <i>G6PC</i>     | <i>SH2D1A</i>    | hsa-miR-607    | High miRNA   |
| <i>SNX19</i>    | <i>GPR107</i>    | hsa-miR-587    | Low miRNA    |
| <i>POU4F2</i>   | <i>ONECUT2</i>   | hsa-miR-185    | High miRNA   |
| <i>SH3TC2</i>   | <i>ADARB2</i>    | hsa-miR-608    | Low miRNA    |
| <i>KIAA1045</i> | <i>DLGAP2</i>    | hsa-miR-637    | Low miRNA    |
| <i>STX11</i>    | <i>CLDN18</i>    | hsa-miR-449b   | Low miRNA    |
| <i>RAB3B</i>    | <i>MCTP2</i>     | hsa-miR-203    | High miRNA   |
| <i>SLC8A2</i>   | <i>AAK1</i>      | hsa-miR-637    | Low miRNA    |
| <i>RAB14</i>    | <i>APPL1</i>     | hsa-miR-607    | Low miRNA    |
| <i>SNX27</i>    | <i>PRPF4B</i>    | hsa-miR-607    | Low miRNA    |
| <i>VGLL3</i>    | <i>CCRL1</i>     | hsa-miR-340    | Medium miRNA |
| <i>CCDC68</i>   | <i>SLC22A3</i>   | hsa-miR-142-5p | Medium miRNA |
| <i>OCN</i>      | <i>ADAMTSL3</i>  | hsa-miR-340    | Medium miRNA |
| <i>HECA</i>     | <i>OSBPL2</i>    | hsa-miR-607    | Low miRNA    |
| <i>PRSS16</i>   | <i>C1orf116</i>  | hsa-miR-539    | Low miRNA    |
| <i>OGN</i>      | <i>OCN</i>       | hsa-miR-488    | High miRNA   |
| <i>INCENP</i>   | <i>SLC7A2</i>    | hsa-miR-15b    | Medium miRNA |
| <i>SLC22A3</i>  | <i>AGTR2</i>     | hsa-miR-607    | High miRNA   |
| <i>SV2B</i>     | <i>PCLO</i>      | hsa-miR-203    | High miRNA   |
| <i>TRAF3</i>    | <i>MS4A1</i>     | hsa-miR-613    | Low miRNA    |
| <i>PTPRT</i>    | <i>GRIN2A</i>    | hsa-miR-203    | High miRNA   |
| <i>EIF5A2</i>   | <i>FAM46C</i>    | hsa-miR-106a   | Medium miRNA |
| <i>RAB3B</i>    | <i>ST8SLA3</i>   | hsa-miR-186    | Low miRNA    |
| <i>RTF1</i>     | <i>EP400</i>     | hsa-miR-603    | Low miRNA    |
| <i>SLC8A2</i>   | <i>BSN</i>       | hsa-miR-185    | High miRNA   |
| <i>ZEB2</i>     | <i>RPS6KB1</i>   | hsa-miR-200b   | High miRNA   |
| <i>SNX27</i>    | <i>YTHDC1</i>    | hsa-miR-607    | Low miRNA    |

|                 |                 |                |              |
|-----------------|-----------------|----------------|--------------|
| <i>IQSEC3</i>   | <i>SNCB</i>     | hsa-miR-663    | Low miRNA    |
| <i>TNPO1</i>    | <i>PPP3CA</i>   | hsa-miR-495    | Low miRNA    |
| <i>KIAA0513</i> | <i>CAMK2A</i>   | hsa-miR-485-5p | High miRNA   |
| <i>ACSL4</i>    | <i>GFPT1</i>    | hsa-miR-181b   | Medium miRNA |
| <i>MTF1</i>     | <i>ARHGAP5</i>  | hsa-miR-607    | Low miRNA    |
| <i>HPCAL4</i>   | <i>SLC8A2</i>   | hsa-miR-7      | High miRNA   |
| <i>KCNS1</i>    | <i>CNNM1</i>    | hsa-miR-326    | High miRNA   |
| <i>ATXN1</i>    | <i>AUTS2</i>    | hsa-miR-527    | Medium miRNA |
| <i>OCLN</i>     | <i>NPR3</i>     | hsa-miR-340    | Low miRNA    |
| <i>STXBP5L</i>  | <i>AAK1</i>     | hsa-miR-605    | Low miRNA    |
| <i>MECP2</i>    | <i>TMEM57</i>   | hsa-miR-141    | High miRNA   |
| <i>PCSK2</i>    | <i>AAK1</i>     | hsa-miR-329    | High miRNA   |
| <i>DCP1A</i>    | <i>YWHAZ</i>    | hsa-miR-544    | Low miRNA    |
| <i>CUL4B</i>    | <i>SSR3</i>     | hsa-miR-570    | Low miRNA    |
| <i>C1orf116</i> | <i>DSG3</i>     | hsa-miR-369-3p | High miRNA   |
| <i>RAB5A</i>    | <i>RAB11A</i>   | hsa-miR-539    | Low miRNA    |
| <i>SENP5</i>    | <i>DSG3</i>     | hsa-miR-607    | High miRNA   |
| <i>WDFY3</i>    | <i>YWHAZ</i>    | hsa-miR-544    | Low miRNA    |
| <i>SLC6A14</i>  | <i>TP63</i>     | hsa-miR-340    | Low miRNA    |
| <i>MBNL3</i>    | <i>SH2D1A</i>   | hsa-miR-607    | High miRNA   |
| <i>KIAA1045</i> | <i>PTPRT</i>    | hsa-miR-636    | Low miRNA    |
| <i>SNX27</i>    | <i>MTDH</i>     | hsa-miR-607    | Low miRNA    |
| <i>PCMI</i>     | <i>PDLIM5</i>   | hsa-miR-150    | Medium miRNA |
| <i>PIP4K2B</i>  | <i>PIP5K1C</i>  | hsa-miR-661    | Low miRNA    |
| <i>AAK1</i>     | <i>NDRG3</i>    | hsa-miR-485-5p | High miRNA   |
| <i>CLDN8</i>    | <i>PLD1</i>     | hsa-miR-579    | Medium miRNA |
| <i>PCSK2</i>    | <i>GABRA1</i>   | hsa-miR-203    | High miRNA   |
| <i>SV2B</i>     | <i>KIAA0513</i> | hsa-miR-485-5p | High miRNA   |
| <i>ATP2B2</i>   | <i>AAK1</i>     | hsa-miR-7      | High miRNA   |
| <i>CACNG2</i>   | <i>AAK1</i>     | hsa-miR-637    | Low miRNA    |
| <i>SLC7A2</i>   | <i>TFAP2C</i>   | hsa-miR-603    | High miRNA   |
| <i>ARL5A</i>    | <i>PMPCB</i>    | hsa-miR-200b   | High miRNA   |
| <i>DCP1A</i>    | <i>ZNF629</i>   | hsa-miR-544    | High miRNA   |
| <i>AAK1</i>     | <i>PCLO</i>     | hsa-miR-203    | High miRNA   |
| <i>LDLR</i>     | <i>VGLL3</i>    | hsa-miR-520g   | Low miRNA    |
| <i>GFPT1</i>    | <i>NRIP1</i>    | hsa-miR-656    | Low miRNA    |

|                  |                 |                |              |
|------------------|-----------------|----------------|--------------|
| <i>SLC17A6</i>   | <i>DLGAP2</i>   | hsa-miR-25     | Low miRNA    |
| <i>CLDN1</i>     | <i>KLF5</i>     | hsa-miR-186    | Medium miRNA |
| <i>UCHL5</i>     | <i>UMPS</i>     | hsa-miR-485-3p | Low miRNA    |
| <i>BCL11B</i>    | <i>ONECUT2</i>  | hsa-miR-195    | Medium miRNA |
| <i>GABRA1</i>    | <i>AAK1</i>     | hsa-miR-203    | High miRNA   |
| <i>PPP1R16B</i>  | <i>FA2H</i>     | hsa-miR-608    | Low miRNA    |
| <i>QKI</i>       | <i>JHDM1D</i>   | hsa-miR-600    | Low miRNA    |
| <i>PPP1R16B</i>  | <i>CNNM1</i>    | hsa-miR-31     | High miRNA   |
| <i>CREB1</i>     | <i>RBBP4</i>    | hsa-miR-539    | Low miRNA    |
| <i>TMEM127</i>   | <i>HGSNAT</i>   | hsa-miR-204    | Medium miRNA |
| <i>ETF1</i>      | <i>ARF6</i>     | hsa-miR-520h   | Low miRNA    |
| <i>SYT13</i>     | <i>DLGAP2</i>   | hsa-miR-205    | Low miRNA    |
| <i>TNFSF15</i>   | <i>PIGR</i>     | hsa-miR-580    | Medium miRNA |
| <i>SLC7A11</i>   | <i>MTM1</i>     | hsa-miR-570    | Low miRNA    |
| <i>SV2B</i>      | <i>CAMK2A</i>   | hsa-miR-485-5p | High miRNA   |
| <i>CCDC68</i>    | <i>CCRL1</i>    | hsa-miR-340    | Medium miRNA |
| <i>SORBS3</i>    | <i>SSBP3</i>    | hsa-miR-608    | Low miRNA    |
| <i>RAB11FIP2</i> | <i>NANOS1</i>   | hsa-miR-200b   | Low miRNA    |
| <i>KIAA1045</i>  | <i>ATP2B3</i>   | hsa-miR-326    | High miRNA   |
| <i>NOTCH2</i>    | <i>TTC28</i>    | hsa-miR-204    | Medium miRNA |
| <i>QKI</i>       | <i>OSBPL2</i>   | hsa-miR-607    | Low miRNA    |
| <i>KCNC1</i>     | <i>SV2B</i>     | hsa-miR-203    | High miRNA   |
| <i>GOSR1</i>     | <i>KIAA0226</i> | hsa-miR-150    | Medium miRNA |
| <i>SV2B</i>      | <i>BSN</i>      | hsa-miR-539    | High miRNA   |
| <i>CAMK2G</i>    | <i>AAK1</i>     | hsa-miR-495    | High miRNA   |
| <i>FAT2</i>      | <i>BCL11B</i>   | hsa-miR-519e   | High miRNA   |
| <i>TFEC</i>      | <i>MGAT4A</i>   | hsa-miR-142-5p | High miRNA   |
| <i>PTER</i>      | <i>ENTPD1</i>   | hsa-miR-607    | Medium miRNA |
| <i>AP1S2</i>     | <i>NLGN4X</i>   | hsa-miR-561    | High miRNA   |
| <i>ASB1</i>      | <i>RNF8</i>     | hsa-miR-607    | Low miRNA    |
| <i>GRIN2A</i>    | <i>AAK1</i>     | hsa-miR-203    | High miRNA   |
| <i>BSN</i>       | <i>KIAA0319</i> | hsa-miR-326    | High miRNA   |
| <i>KIF3A</i>     | <i>SPAG9</i>    | hsa-miR-181b   | Low miRNA    |
| <i>APPL1</i>     | <i>IREB2</i>    | hsa-miR-607    | Low miRNA    |
| <i>TRPS1</i>     | <i>ELAVL1</i>   | hsa-miR-577    | Low miRNA    |
| <i>MAP4K4</i>    | <i>LPGAT1</i>   | hsa-miR-559    | Low miRNA    |

|                 |                  |                |              |
|-----------------|------------------|----------------|--------------|
| <i>POU2AF1</i>  | <i>CCL22</i>     | hsa-miR-485-5p | High miRNA   |
| <i>PPM1H</i>    | <i>TPPP</i>      | hsa-miR-661    | Low miRNA    |
| <i>NRIP2</i>    | <i>ANK1</i>      | hsa-miR-650    | Medium miRNA |
| <i>MECP2</i>    | <i>C17orf63</i>  | hsa-miR-625    | Low miRNA    |
| <i>C5AR1</i>    | <i>EMR2</i>      | hsa-miR-150    | Low miRNA    |
| <i>STXBP5L</i>  | <i>TRHDE</i>     | hsa-miR-580    | Low miRNA    |
| <i>TMOD3</i>    | <i>ZFH3</i>      | hsa-miR-570    | Low miRNA    |
| <i>TRIM2</i>    | <i>PKIA</i>      | hsa-miR-145    | High miRNA   |
| <i>CLDN18</i>   | <i>VGLL3</i>     | hsa-miR-495    | High miRNA   |
| <i>BSN</i>      | <i>AAK1</i>      | hsa-miR-149    | High miRNA   |
| <i>LRPPRC</i>   | <i>C1orf9</i>    | hsa-miR-607    | Low miRNA    |
| <i>KCNC1</i>    | <i>GABRA1</i>    | hsa-miR-203    | High miRNA   |
| <i>RUNX1T1</i>  | <i>BCL11A</i>    | hsa-miR-186    | Low miRNA    |
| <i>GSPT1</i>    | <i>KPNA1</i>     | hsa-miR-577    | Low miRNA    |
| <i>OPA3</i>     | <i>PGPEP1</i>    | hsa-miR-612    | Low miRNA    |
| <i>BSN</i>      | <i>STXBP5L</i>   | hsa-miR-539    | High miRNA   |
| <i>KCTD2</i>    | <i>PIP5K1C</i>   | hsa-miR-608    | Low miRNA    |
| <i>SH3TC2</i>   | <i>ADARB2</i>    | hsa-miR-581    | Low miRNA    |
| <i>SV2B</i>     | <i>AAK1</i>      | hsa-miR-527    | Low miRNA    |
| <i>ZNF430</i>   | <i>C14orf135</i> | hsa-miR-561    | Low miRNA    |
| <i>IL24</i>     | <i>MCTP2</i>     | hsa-miR-203    | High miRNA   |
| <i>NLGN4X</i>   | <i>PMP2</i>      | hsa-miR-23a    | Medium miRNA |
| <i>PTGFR</i>    | <i>GFRA1</i>     | hsa-miR-520f   | Low miRNA    |
| <i>LHFPL2</i>   | <i>ENTPD1</i>    | hsa-miR-568    | Low miRNA    |
| <i>IREB2</i>    | <i>ASB1</i>      | hsa-miR-607    | Low miRNA    |
| <i>SV2B</i>     | <i>AAK1</i>      | hsa-miR-485-5p | High miRNA   |
| <i>SYP</i>      | <i>TRIM3</i>     | hsa-miR-608    | Low miRNA    |
| <i>NEFH</i>     | <i>STXBP5L</i>   | hsa-miR-137    | High miRNA   |
| <i>KIAA0513</i> | <i>CNTNAP2</i>   | hsa-miR-372    | Low miRNA    |
| <i>CDC42EP1</i> | <i>ARHGDI1</i>   | hsa-miR-637    | Low miRNA    |
| <i>SMARCA5</i>  | <i>PPP3CA</i>    | hsa-miR-381    | Low miRNA    |
| <i>FGF7</i>     | <i>VGLL3</i>     | hsa-miR-340    | High miRNA   |
| <i>ICK</i>      | <i>ZEB2</i>      | hsa-miR-369-3p | Medium miRNA |
| <i>TMED7</i>    | <i>PEX19</i>     | hsa-miR-561    | Low miRNA    |
| <i>PSD3</i>     | <i>ANK2</i>      | hsa-miR-302b   | Low miRNA    |
| <i>SERPIN13</i> | <i>NPR3</i>      | hsa-miR-340    | Medium miRNA |

|                 |                  |                |              |
|-----------------|------------------|----------------|--------------|
| <i>TBL1XR1</i>  | <i>MTF1</i>      | hsa-miR-367    | Low miRNA    |
| <i>RBMS2</i>    | <i>IRAK3</i>     | hsa-miR-641    | Low miRNA    |
| <i>MARK2</i>    | <i>SSBP3</i>     | hsa-miR-608    | Low miRNA    |
| <i>DAZ1</i>     | <i>DAZ4</i>      | hsa-miR-429    | Medium miRNA |
| <i>RAB3B</i>    | <i>KLK10</i>     | hsa-miR-612    | High miRNA   |
| <i>C1orf116</i> | <i>DPT</i>       | hsa-miR-299-3p | Low miRNA    |
| <i>PAX8</i>     | <i>SLC34A2</i>   | hsa-miR-637    | Medium miRNA |
| <i>SLC7A2</i>   | <i>GFRA1</i>     | hsa-miR-539    | Low miRNA    |
| <i>PTPRT</i>    | <i>AAK1</i>      | hsa-miR-203    | High miRNA   |
| <i>PPP1R12A</i> | <i>CPSF6</i>     | hsa-miR-607    | Low miRNA    |
| <i>CDC42BPB</i> | <i>SSBP3</i>     | hsa-miR-608    | Low miRNA    |
| <i>AGPS</i>     | <i>ZEB2</i>      | hsa-miR-200a   | High miRNA   |
| <i>VGLL3</i>    | <i>OCN</i>       | hsa-miR-520h   | Medium miRNA |
| <i>GFRA1</i>    | <i>PDE3B</i>     | hsa-miR-186    | Medium miRNA |
| <i>AGPS</i>     | <i>KPNA4</i>     | hsa-miR-656    | Low miRNA    |
| <i>MARK2</i>    | <i>ATP6V0A1</i>  | hsa-miR-608    | Low miRNA    |
| <i>IRF4</i>     | <i>IL2RB</i>     | hsa-miR-34a    | Low miRNA    |
| <i>RAB3B</i>    | <i>SERPINB13</i> | hsa-miR-570    | High miRNA   |
| <i>PRKACA</i>   | <i>SSBP3</i>     | hsa-miR-608    | Low miRNA    |
| <i>TGOLN2</i>   | <i>RANBP2</i>    | hsa-miR-607    | Low miRNA    |
| <i>NR4A3</i>    | <i>SLC18A2</i>   | hsa-miR-641    | High miRNA   |
| <i>ATAD2B</i>   | <i>ASB1</i>      | hsa-miR-607    | Low miRNA    |
| <i>SCN9A</i>    | <i>PRRG4</i>     | hsa-miR-607    | High miRNA   |
| <i>SLC8A2</i>   | <i>CAMKK2</i>    | hsa-miR-7      | High miRNA   |
| <i>SCRNI</i>    | <i>KIAA0494</i>  | hsa-miR-659    | Low miRNA    |
| <i>GPI</i>      | <i>GLG1</i>      | hsa-miR-661    | High miRNA   |
| <i>QKI</i>      | <i>MIA3</i>      | hsa-miR-186    | Medium miRNA |
| <i>RAB14</i>    | <i>SNX27</i>     | hsa-miR-607    | Low miRNA    |
| <i>SGPP1</i>    | <i>EXOC5</i>     | hsa-miR-561    | Low miRNA    |
| <i>AAK1</i>     | <i>HLF</i>       | hsa-miR-520g   | Low miRNA    |
| <i>NOS1AP</i>   | <i>AAK1</i>      | hsa-miR-329    | High miRNA   |
| <i>FECH</i>     | <i>ULK2</i>      | hsa-miR-607    | Low miRNA    |
| <i>TARDBP</i>   | <i>ZC3H11A</i>   | hsa-miR-186    | High miRNA   |
| <i>SV2B</i>     | <i>PCSK2</i>     | hsa-miR-203    | High miRNA   |
| <i>DAZL</i>     | <i>SGCD</i>      | hsa-miR-577    | Low miRNA    |
| <i>PPM1H</i>    | <i>FAIM2</i>     | hsa-miR-661    | Low miRNA    |

|                 |                  |              |              |
|-----------------|------------------|--------------|--------------|
| <i>B3GAT1</i>   | <i>ASTN1</i>     | hsa-miR-147  | High miRNA   |
| <i>STX12</i>    | <i>SERINC1</i>   | hsa-miR-607  | High miRNA   |
| <i>QKI</i>      | <i>ICK</i>       | hsa-miR-607  | Low miRNA    |
| <i>DSC3</i>     | <i>FGD6</i>      | hsa-miR-105  | High miRNA   |
| <i>PFKFB3</i>   | <i>ZMIZ1</i>     | hsa-miR-185  | High miRNA   |
| <i>POGK</i>     | <i>PDHA1</i>     | hsa-miR-1    | High miRNA   |
| <i>APH1A</i>    | <i>PFAS</i>      | hsa-miR-539  | Low miRNA    |
| <i>GRIN2A</i>   | <i>PCLO</i>      | hsa-miR-203  | High miRNA   |
| <i>ULK2</i>     | <i>OSBPL2</i>    | hsa-miR-607  | Low miRNA    |
| <i>KIAA1045</i> | <i>PCLO</i>      | hsa-miR-218  | High miRNA   |
| <i>MECP2</i>    | <i>MTF1</i>      | hsa-miR-580  | Low miRNA    |
| <i>INCENP</i>   | <i>SLC7A2</i>    | hsa-miR-424  | Medium miRNA |
| <i>NPR3</i>     | <i>TP63</i>      | hsa-miR-340  | Medium miRNA |
| <i>PAICS</i>    | <i>UBE2G1</i>    | hsa-miR-539  | Low miRNA    |
| <i>FOXN3</i>    | <i>CTNND1</i>    | hsa-miR-527  | High miRNA   |
| <i>FBXL18</i>   | <i>SSBP3</i>     | hsa-miR-608  | Low miRNA    |
| <i>IQSEC3</i>   | <i>CNNM1</i>     | hsa-miR-326  | High miRNA   |
| <i>CORO2A</i>   | <i>RAB11FIP1</i> | hsa-miR-150  | High miRNA   |
| <i>APPBP2</i>   | <i>YWHAZ</i>     | hsa-miR-544  | Low miRNA    |
| <i>PHIP</i>     | <i>ZC3H11A</i>   | hsa-miR-186  | High miRNA   |
| <i>ARHGAP5</i>  | <i>ATRN</i>      | hsa-miR-607  | Low miRNA    |
| <i>BCL2L1</i>   | <i>SSBP3</i>     | hsa-miR-608  | Low miRNA    |
| <i>TBL1XR1</i>  | <i>CLIP1</i>     | hsa-miR-570  | Low miRNA    |
| <i>KPNA4</i>    | <i>ANKFY1</i>    | hsa-miR-561  | Low miRNA    |
| <i>SNX27</i>    | <i>CPSF6</i>     | hsa-miR-607  | Low miRNA    |
| <i>PAFAH2</i>   | <i>FBXL18</i>    | hsa-miR-520h | Low miRNA    |
| <i>TK2</i>      | <i>PHACTR2</i>   | hsa-miR-552  | Low miRNA    |
| <i>PLEKHB2</i>  | <i>LRPPRC</i>    | hsa-miR-607  | Low miRNA    |
| <i>RTF1</i>     | <i>ANKFY1</i>    | hsa-miR-603  | Low miRNA    |
| <i>ATP2B4</i>   | <i>ZFAND5</i>    | hsa-miR-135a | Medium miRNA |
| <i>MEF2C</i>    | <i>NEFL</i>      | hsa-miR-203  | High miRNA   |
| <i>TBL1XR1</i>  | <i>MTM1</i>      | hsa-miR-570  | Low miRNA    |
| <i>ARHGAP5</i>  | <i>C3orf63</i>   | hsa-miR-607  | Low miRNA    |
| <i>MRPL19</i>   | <i>KPNA1</i>     | hsa-miR-577  | Low miRNA    |
| <i>OCLN</i>     | <i>TMEM30B</i>   | hsa-miR-607  | High miRNA   |
| <i>ABL1</i>     | <i>TSC1</i>      | hsa-miR-637  | Medium miRNA |

|                 |                 |                |              |
|-----------------|-----------------|----------------|--------------|
| <i>PRUNE2</i>   | <i>LSAMP</i>    | hsa-miR-147    | High miRNA   |
| <i>SENP5</i>    | <i>PRRG4</i>    | hsa-miR-607    | High miRNA   |
| <i>TSPYL1</i>   | <i>SV2B</i>     | hsa-miR-485-5p | High miRNA   |
| <i>MIA3</i>     | <i>8-Sep</i>    | hsa-miR-186    | Medium miRNA |
| <i>B3GAT1</i>   | <i>LSAMP</i>    | hsa-miR-147    | High miRNA   |
| <i>MBNL3</i>    | <i>SH2D1A</i>   | hsa-miR-511    | High miRNA   |
| <i>PDE4B</i>    | <i>ABAT</i>     | hsa-miR-369-3p | High miRNA   |
| <i>SYNJ2</i>    | <i>EREG</i>     | hsa-miR-586    | High miRNA   |
| <i>SLC18A2</i>  | <i>VGLL3</i>    | hsa-miR-561    | High miRNA   |
| <i>SOSTDC1</i>  | <i>MPZL2</i>    | hsa-miR-561    | High miRNA   |
| <i>SLC6A1</i>   | <i>SLC1A2</i>   | hsa-miR-27a    | High miRNA   |
| <i>BNC2</i>     | <i>ITGA4</i>    | hsa-miR-93     | Low miRNA    |
| <i>SV2B</i>     | <i>ATP2B2</i>   | hsa-miR-7      | High miRNA   |
| <i>KLC2</i>     | <i>PIP4K2B</i>  | hsa-miR-661    | Low miRNA    |
| <i>GNAI3</i>    | <i>MAP3K2</i>   | hsa-miR-607    | Low miRNA    |
| <i>KCNS1</i>    | <i>FBXO41</i>   | hsa-miR-326    | High miRNA   |
| <i>KCTD2</i>    | <i>HELZ</i>     | hsa-miR-608    | Low miRNA    |
| <i>TMED5</i>    | <i>YWHAZ</i>    | hsa-miR-544    | Low miRNA    |
| <i>MARK2</i>    | <i>RAB3IL1</i>  | hsa-miR-608    | Low miRNA    |
| <i>MAPKAPK2</i> | <i>SSBP3</i>    | hsa-miR-608    | Low miRNA    |
| <i>PAFAH2</i>   | <i>KCNJ10</i>   | hsa-miR-520h   | Low miRNA    |
| <i>ARHGAP5</i>  | <i>OSBPL2</i>   | hsa-miR-607    | Low miRNA    |
| <i>C19orf2</i>  | <i>LSM14A</i>   | hsa-miR-144    | High miRNA   |
| <i>PACS2</i>    | <i>MARK2</i>    | hsa-miR-608    | Low miRNA    |
| <i>PELI1</i>    | <i>PTP4A1</i>   | hsa-miR-607    | Low miRNA    |
| <i>AAK1</i>     | <i>ARF3</i>     | hsa-miR-329    | High miRNA   |
| <i>KIAA0513</i> | <i>KIAA0319</i> | hsa-miR-326    | High miRNA   |
| <i>KCNS1</i>    | <i>FBXO41</i>   | hsa-miR-149    | High miRNA   |
| <i>ATXN1</i>    | <i>BBS9</i>     | hsa-miR-340    | Low miRNA    |
| <i>MYO1D</i>    | <i>WNT7B</i>    | hsa-miR-608    | High miRNA   |
| <i>CREB1</i>    | <i>CAND1</i>    | hsa-miR-495    | Low miRNA    |
| <i>PPP3CA</i>   | <i>SMCR7L</i>   | hsa-miR-495    | Low miRNA    |
| <i>ZNF592</i>   | <i>BTBD2</i>    | hsa-miR-637    | Low miRNA    |
| <i>BSN</i>      | <i>SOX4</i>     | hsa-miR-539    | Low miRNA    |
| <i>PPM1H</i>    | <i>MEF2C</i>    | hsa-miR-570    | Low miRNA    |
| <i>GABRA1</i>   | <i>RIMS3</i>    | hsa-miR-222    | High miRNA   |

|                 |                |                |              |
|-----------------|----------------|----------------|--------------|
| <i>KCNA1</i>    | <i>PKP1</i>    | hsa-miR-558    | Medium miRNA |
| <i>NCDN</i>     | <i>TPPP</i>    | hsa-miR-637    | Low miRNA    |
| <i>CAMK2G</i>   | <i>CASK</i>    | hsa-miR-495    | Low miRNA    |
| <i>MECP2</i>    | <i>YWHAZ</i>   | hsa-miR-544    | Low miRNA    |
| <i>FGF7</i>     | <i>RAB3B</i>   | hsa-miR-570    | Low miRNA    |
| <i>OXCT1</i>    | <i>RFC5</i>    | hsa-miR-340    | Low miRNA    |
| <i>KIAA1045</i> | <i>SLC8A2</i>  | hsa-miR-625    | Medium miRNA |
| <i>ARHGAP5</i>  | <i>ATM</i>     | hsa-miR-607    | Low miRNA    |
| <i>SNX27</i>    | <i>UBE4B</i>   | hsa-miR-607    | Low miRNA    |
| <i>SORL1</i>    | <i>SLC7A11</i> | hsa-miR-144    | High miRNA   |
| <i>KIAA1045</i> | <i>PTPRT</i>   | hsa-miR-218    | High miRNA   |
| <i>SNPH</i>     | <i>EHD3</i>    | hsa-miR-637    | Low miRNA    |
| <i>MEF2C</i>    | <i>PREPL</i>   | hsa-miR-410    | High miRNA   |
| <i>RNF44</i>    | <i>TSC1</i>    | hsa-miR-324-3p | Medium miRNA |
| <i>GSPT1</i>    | <i>GNAI3</i>   | hsa-miR-544    | Low miRNA    |
| <i>OPA3</i>     | <i>STAT2</i>   | hsa-miR-612    | Low miRNA    |
| <i>SV2B</i>     | <i>SNPH</i>    | hsa-miR-485-5p | High miRNA   |
| <i>ZNF592</i>   | <i>HIF1AN</i>  | hsa-miR-185    | High miRNA   |
| <i>MECP2</i>    | <i>USP22</i>   | hsa-miR-646    | Low miRNA    |
| <i>SH2D1A</i>   | <i>SLC38A4</i> | hsa-miR-607    | High miRNA   |
| <i>KCNJ10</i>   | <i>MAP3K2</i>  | hsa-miR-578    | Low miRNA    |
| <i>SALL1</i>    | <i>MIA3</i>    | hsa-miR-186    | Medium miRNA |
| <i>CAPRIN1</i>  | <i>RHOBTB3</i> | hsa-miR-656    | Low miRNA    |
| <i>NRIP3</i>    | <i>RPH3A</i>   | hsa-miR-485-5p | High miRNA   |
| <i>SENP5</i>    | <i>TMPRSS4</i> | hsa-miR-612    | High miRNA   |
| <i>MRPS10</i>   | <i>TRIM13</i>  | hsa-miR-561    | Low miRNA    |
| <i>SLC8A2</i>   | <i>BSN</i>     | hsa-miR-608    | Low miRNA    |
| <i>KCNC1</i>    | <i>NRIP3</i>   | hsa-miR-485-5p | High miRNA   |
| <i>ZNF532</i>   | <i>RRP15</i>   | hsa-miR-200c   | High miRNA   |
| <i>COL4A4</i>   | <i>CLDN18</i>  | hsa-miR-34a    | High miRNA   |
| <i>SNX27</i>    | <i>FBXW2</i>   | hsa-miR-24     | High miRNA   |
| <i>RAB3B</i>    | <i>KLF5</i>    | hsa-miR-186    | Medium miRNA |
| <i>SV2B</i>     | <i>SLC1A2</i>  | hsa-miR-7      | High miRNA   |
| <i>OCLN</i>     | <i>NPR3</i>    | hsa-miR-607    | High miRNA   |
| <i>OPA3</i>     | <i>MAP3K2</i>  | hsa-miR-578    | Low miRNA    |
| <i>APPBP2</i>   | <i>PRPF4B</i>  | hsa-miR-607    | Low miRNA    |



|                 |                |                |              |
|-----------------|----------------|----------------|--------------|
| <i>KIAA1045</i> | <i>STXBP5L</i> | hsa-miR-618    | Low miRNA    |
| <i>KIAA1045</i> | <i>CBX7</i>    | hsa-miR-218    | High miRNA   |
| <i>ANKFY1</i>   | <i>MAP3K2</i>  | hsa-miR-561    | Low miRNA    |
| <i>APPL1</i>    | <i>SNX19</i>   | hsa-miR-607    | Low miRNA    |
| <i>PHACTR2</i>  | <i>METTL8</i>  | hsa-miR-552    | Low miRNA    |
| <i>VGLL3</i>    | <i>SLC6A14</i> | hsa-miR-105    | Medium miRNA |
| <i>RUNX1T1</i>  | <i>VASH2</i>   | hsa-miR-186    | Low miRNA    |
| <i>FOXN3</i>    | <i>BMPR2</i>   | hsa-miR-515-5p | High miRNA   |
| <i>MXD4</i>     | <i>PTPN18</i>  | hsa-miR-34a    | High miRNA   |
| <i>FXN</i>      | <i>LARP4</i>   | hsa-miR-603    | Low miRNA    |
| <i>SSR1</i>     | <i>ETF1</i>    | hsa-miR-520h   | Low miRNA    |
| <i>MEF2C</i>    | <i>SCAMP1</i>  | hsa-miR-410    | High miRNA   |
| <i>CRTC1</i>    | <i>SSBP3</i>   | hsa-miR-608    | Low miRNA    |
| <i>ARHGAP5</i>  | <i>PKD2</i>    | hsa-miR-607    | Low miRNA    |
| <i>CLEC2D</i>   | <i>TRAF3</i>   | hsa-miR-570    | Low miRNA    |
| <i>BSN</i>      | <i>GRIN2A</i>  | hsa-miR-326    | High miRNA   |
| <i>STXBP5L</i>  | <i>AAK1</i>    | hsa-miR-539    | High miRNA   |
| <i>QKI</i>      | <i>CEP170</i>  | hsa-miR-488    | Medium miRNA |
| <i>WDFY3</i>    | <i>NIPBL</i>   | hsa-miR-544    | Low miRNA    |
| <i>DYNC1LI2</i> | <i>TNRC6B</i>  | hsa-miR-93     | Medium miRNA |
| <i>METTL8</i>   | <i>ZEB2</i>    | hsa-miR-200b   | High miRNA   |
| <i>CLCA2</i>    | <i>DSC2</i>    | hsa-miR-495    | Low miRNA    |
| <i>GPM6B</i>    | <i>SGCB</i>    | hsa-miR-579    | High miRNA   |
| <i>UBP1</i>     | <i>KPNA1</i>   | hsa-miR-570    | Low miRNA    |
| <i>RAB6B</i>    | <i>AAK1</i>    | hsa-miR-329    | High miRNA   |
| <i>UBE2J1</i>   | <i>LPGAT1</i>  | hsa-miR-607    | Low miRNA    |
| <i>RAB14</i>    | <i>ICK</i>     | hsa-miR-607    | Low miRNA    |
| <i>TMED7</i>    | <i>COX11</i>   | hsa-miR-200b   | High miRNA   |
| <i>KCNC1</i>    | <i>STXBP5L</i> | hsa-miR-605    | Low miRNA    |
| <i>HS2ST1</i>   | <i>HIP1</i>    | hsa-miR-520b   | Low miRNA    |
| <i>KCNS1</i>    | <i>AAK1</i>    | hsa-miR-149    | High miRNA   |
| <i>ICK</i>      | <i>ZEB2</i>    | hsa-miR-656    | Low miRNA    |
| <i>BCL11B</i>   | <i>VASH2</i>   | hsa-miR-20b    | High miRNA   |
| <i>DNAJC16</i>  | <i>TXLNA</i>   | hsa-miR-646    | Low miRNA    |
| <i>PIK3R1</i>   | <i>TCF4</i>    | hsa-miR-495    | Medium miRNA |
| <i>SSR1</i>     | <i>TMEM30A</i> | hsa-miR-656    | Low miRNA    |

|                 |                  |              |              |
|-----------------|------------------|--------------|--------------|
| <i>TGOLN2</i>   | <i>ARHGAP5</i>   | hsa-miR-607  | Low miRNA    |
| <i>AGPS</i>     | <i>PAFAH1B1</i>  | hsa-miR-603  | Low miRNA    |
| <i>DCP2</i>     | <i>YWHAZ</i>     | hsa-miR-544  | Low miRNA    |
| <i>CACNB4</i>   | <i>HLF</i>       | hsa-miR-520g | Low miRNA    |
| <i>TULP4</i>    | <i>LPGAT1</i>    | hsa-miR-607  | Low miRNA    |
| <i>CTSB</i>     | <i>SYK</i>       | hsa-miR-24   | Medium miRNA |
| <i>ARRB1</i>    | <i>RAB11FIP1</i> | hsa-miR-150  | High miRNA   |
| <i>LARP1</i>    | <i>MLL</i>       | hsa-miR-150  | Medium miRNA |
| <i>KIAA0513</i> | <i>SCN2A</i>     | hsa-miR-107  | High miRNA   |
| <i>PURA</i>     | <i>DYNC1LI2</i>  | hsa-miR-93   | Low miRNA    |
| <i>SLC25A21</i> | <i>GFRA1</i>     | hsa-miR-607  | Low miRNA    |
| <i>STYK1</i>    | <i>DSG3</i>      | hsa-miR-211  | Low miRNA    |
| <i>SLC6A14</i>  | <i>SLCO4C1</i>   | hsa-miR-340  | Medium miRNA |
| <i>CCDC90A</i>  | <i>MTDH</i>      | hsa-miR-520b | Low miRNA    |
| <i>RGS5</i>     | <i>TCF4</i>      | hsa-miR-579  | High miRNA   |
| <i>TULP4</i>    | <i>OSBPL2</i>    | hsa-miR-607  | Low miRNA    |
| <i>PTGFR</i>    | <i>RUNX1T1</i>   | hsa-miR-384  | Medium miRNA |
| <i>KCNS1</i>    | <i>AAK1</i>      | hsa-miR-377  | High miRNA   |
| <i>SLC7A2</i>   | <i>ATP8A1</i>    | hsa-miR-452  | High miRNA   |
| <i>AP2A2</i>    | <i>PIP5K1C</i>   | hsa-miR-661  | Low miRNA    |
| <i>SCAMP1</i>   | <i>AKAP11</i>    | hsa-miR-607  | Low miRNA    |
| <i>ZNF264</i>   | <i>NUP50</i>     | hsa-miR-603  | Low miRNA    |
| <i>PCSK2</i>    | <i>PCLO</i>      | hsa-miR-203  | High miRNA   |
| <i>PAFAH1B1</i> | <i>ANKFY1</i>    | hsa-miR-603  | Low miRNA    |
| <i>KCNC1</i>    | <i>BSN</i>       | hsa-miR-149  | High miRNA   |
| <i>PAK6</i>     | <i>AAK1</i>      | hsa-miR-185  | High miRNA   |
| <i>TRAF3</i>    | <i>DSG3</i>      | hsa-miR-29a  | Low miRNA    |
| <i>NCAM1</i>    | <i>CBX5</i>      | hsa-miR-570  | Medium miRNA |
| <i>KL</i>       | <i>CCDC68</i>    | hsa-miR-607  | Medium miRNA |
| <i>NCDN</i>     | <i>CACNG2</i>    | hsa-miR-637  | Low miRNA    |
| <i>SNX27</i>    | <i>ARHGAP5</i>   | hsa-miR-607  | Low miRNA    |
| <i>NRIP3</i>    | <i>DLGAP2</i>    | hsa-miR-539  | High miRNA   |
| <i>ARNT2</i>    | <i>TBC1D13</i>   | hsa-miR-637  | Medium miRNA |
| <i>CANX</i>     | <i>RNF138</i>    | hsa-miR-186  | Medium miRNA |
| <i>SCAMP4</i>   | <i>PIP5K1C</i>   | hsa-miR-661  | Low miRNA    |
| <i>ELAVL1</i>   | <i>RAB11FIP2</i> | hsa-miR-577  | Low miRNA    |

|                 |                  |                |              |
|-----------------|------------------|----------------|--------------|
| <i>KLC2</i>     | <i>SBF1</i>      | hsa-miR-661    | Low miRNA    |
| <i>KCNN3</i>    | <i>SHC3</i>      | hsa-miR-27a    | High miRNA   |
| <i>RAB3B</i>    | <i>MCTP2</i>     | hsa-miR-607    | High miRNA   |
| <i>AAK1</i>     | <i>FAIM2</i>     | hsa-miR-7      | High miRNA   |
| <i>PTPRN</i>    | <i>SCN3B</i>     | hsa-miR-485-5p | High miRNA   |
| <i>COL4A4</i>   | <i>SLC6A14</i>   | hsa-miR-340    | Medium miRNA |
| <i>ATRN</i>     | <i>OSBPL2</i>    | hsa-miR-607    | Low miRNA    |
| <i>AGPS</i>     | <i>RTF1</i>      | hsa-miR-603    | Low miRNA    |
| <i>SOSTDC1</i>  | <i>DSC3</i>      | hsa-miR-561    | High miRNA   |
| <i>RBM15B</i>   | <i>HGSNAT</i>    | hsa-miR-204    | Medium miRNA |
| <i>AAK1</i>     | <i>CAMKK2</i>    | hsa-miR-7      | High miRNA   |
| <i>SV2B</i>     | <i>KHDRBS2</i>   | hsa-miR-495    | High miRNA   |
| <i>NCDN</i>     | <i>IQSEC3</i>    | hsa-miR-608    | Low miRNA    |
| <i>PSTPIP2</i>  | <i>RAB11FIP1</i> | hsa-miR-24     | Medium miRNA |
| <i>QKI</i>      | <i>AKAP11</i>    | hsa-miR-142-5p | High miRNA   |
| <i>QKI</i>      | <i>PTP4A1</i>    | hsa-miR-607    | Low miRNA    |
| <i>GATAD2A</i>  | <i>ZMIZ1</i>     | hsa-miR-661    | Low miRNA    |
| <i>NRIP3</i>    | <i>RAB6B</i>     | hsa-miR-485-5p | High miRNA   |
| <i>PRKAR1B</i>  | <i>SLC25A22</i>  | hsa-miR-637    | Low miRNA    |
| <i>SORL1</i>    | <i>SLC7A11</i>   | hsa-miR-603    | Low miRNA    |
| <i>UBE2J1</i>   | <i>ENAH</i>      | hsa-miR-607    | Low miRNA    |
| <i>KPNA4</i>    | <i>API5</i>      | hsa-miR-607    | Low miRNA    |
| <i>SLC8A2</i>   | <i>SYP</i>       | hsa-miR-608    | Low miRNA    |
| <i>LMO7</i>     | <i>CTSE</i>      | hsa-miR-105    | Medium miRNA |
| <i>SSR1</i>     | <i>C1orf216</i>  | hsa-miR-603    | Low miRNA    |
| <i>ANKRD40</i>  | <i>LARP4</i>     | hsa-miR-603    | Low miRNA    |
| <i>NCAM1</i>    | <i>LSAMP</i>     | hsa-miR-561    | High miRNA   |
| <i>CCDC68</i>   | <i>VGLL3</i>     | hsa-miR-142-5p | Medium miRNA |
| <i>KCTD2</i>    | <i>HCFC1</i>     | hsa-miR-608    | Low miRNA    |
| <i>TMED5</i>    | <i>BZW1</i>      | hsa-miR-607    | Low miRNA    |
| <i>CUL4B</i>    | <i>ZNF238</i>    | hsa-miR-561    | Low miRNA    |
| <i>ARRB1</i>    | <i>UPK3B</i>     | hsa-miR-185    | Low miRNA    |
| <i>PPP1R16B</i> | <i>FBXO41</i>    | hsa-miR-149    | High miRNA   |
| <i>EIF4E</i>    | <i>PLEKHB2</i>   | hsa-miR-607    | Low miRNA    |
| <i>SLC25A44</i> | <i>TCF4</i>      | hsa-miR-148a   | Medium miRNA |
| <i>SYNJ2BP</i>  | <i>ARHGAP5</i>   | hsa-miR-607    | Low miRNA    |

|                |                  |                |              |
|----------------|------------------|----------------|--------------|
| <i>APH1A</i>   | <i>PJA2</i>      | hsa-miR-539    | Low miRNA    |
| <i>TNFSF15</i> | <i>PERP</i>      | hsa-miR-150    | High miRNA   |
| <i>CUL4B</i>   | <i>KPNA4</i>     | hsa-miR-561    | Low miRNA    |
| <i>AAK1</i>    | <i>CNTNAP2</i>   | hsa-miR-372    | Low miRNA    |
| <i>CHML</i>    | <i>NPR3</i>      | hsa-miR-607    | High miRNA   |
| <i>CUL4B</i>   | <i>KPNA4</i>     | hsa-miR-579    | Low miRNA    |
| <i>KPNA4</i>   | <i>MAP3K2</i>    | hsa-miR-561    | Low miRNA    |
| <i>MARK2</i>   | <i>UBTF</i>      | hsa-miR-608    | Low miRNA    |
| <i>SPAST</i>   | <i>SCAMP1</i>    | hsa-miR-561    | Low miRNA    |
| <i>SLC7A8</i>  | <i>RAB11FIP1</i> | hsa-miR-185    | Medium miRNA |
| <i>RAP2B</i>   | <i>PTEN</i>      | hsa-miR-142-5p | High miRNA   |
| <i>TRAF3</i>   | <i>MS4A1</i>     | hsa-miR-206    | Medium miRNA |
| <i>POU4F1</i>  | <i>ONECUT2</i>   | hsa-miR-659    | High miRNA   |
| <i>MAP4K4</i>  | <i>LARP1</i>     | hsa-miR-150    | Medium miRNA |
| <i>RAB22A</i>  | <i>CEP68</i>     | hsa-miR-204    | Medium miRNA |
| <i>GABRR1</i>  | <i>SLCO4C1</i>   | hsa-miR-410    | Low miRNA    |
| <i>SSBP3</i>   | <i>SH3GLB2</i>   | hsa-miR-608    | Low miRNA    |
| <i>SV2B</i>    | <i>GRIN2A</i>    | hsa-miR-136    | High miRNA   |
| <i>TBL1XR1</i> | <i>DNAJC16</i>   | hsa-miR-570    | Low miRNA    |
| <i>CANX</i>    | <i>PKD2</i>      | hsa-miR-186    | Medium miRNA |
| <i>SSBP3</i>   | <i>GIT1</i>      | hsa-miR-608    | Low miRNA    |
| <i>ARHGAP5</i> | <i>MAP3K2</i>    | hsa-miR-607    | Low miRNA    |
| <i>PBRM1</i>   | <i>TULP4</i>     | hsa-miR-607    | Low miRNA    |
| <i>APPL1</i>   | <i>SERINC1</i>   | hsa-miR-607    | Low miRNA    |
| <i>TBL1XR1</i> | <i>ZFHX3</i>     | hsa-miR-579    | Low miRNA    |
| <i>PAK6</i>    | <i>CHD5</i>      | hsa-miR-631    | Low miRNA    |
| <i>KPNA4</i>   | <i>RAP2C</i>     | hsa-miR-607    | Low miRNA    |
| <i>IQSEC3</i>  | <i>CHD5</i>      | hsa-miR-149    | High miRNA   |
| <i>CSNK1G3</i> | <i>SSR1</i>      | hsa-miR-603    | Low miRNA    |
| <i>RAB5A</i>   | <i>RBBP4</i>     | hsa-miR-539    | Low miRNA    |
| <i>FZR1</i>    | <i>MARK2</i>     | hsa-miR-608    | Low miRNA    |
| <i>JHDM1D</i>  | <i>PPP1R12B</i>  | hsa-miR-600    | Low miRNA    |
| <i>GCN1L1</i>  | <i>LARP4</i>     | hsa-miR-607    | Low miRNA    |
| <i>TFEC</i>    | <i>ENTPD1</i>    | hsa-miR-568    | Low miRNA    |
| <i>SNX27</i>   | <i>APPL1</i>     | hsa-miR-607    | Low miRNA    |
| <i>SORL1</i>   | <i>SLC7A11</i>   | hsa-miR-607    | Low miRNA    |

|                |                  |                |              |
|----------------|------------------|----------------|--------------|
| <i>MECP2</i>   | <i>TEAD1</i>     | hsa-miR-599    | High miRNA   |
| <i>CEACAM5</i> | <i>PRRG4</i>     | hsa-miR-607    | High miRNA   |
| <i>SSR1</i>    | <i>SERINC1</i>   | hsa-miR-607    | Low miRNA    |
| <i>ACTR8</i>   | <i>WNT5A</i>     | hsa-miR-607    | Low miRNA    |
| <i>PRRG4</i>   | <i>RAB11FIP1</i> | hsa-miR-302d   | High miRNA   |
| <i>SYT13</i>   | <i>PAIP2B</i>    | hsa-miR-203    | High miRNA   |
| <i>EPB41L1</i> | <i>FBXO41</i>    | hsa-miR-149    | High miRNA   |
| <i>VASH2</i>   | <i>GFRA1</i>     | hsa-miR-186    | Low miRNA    |
| <i>CREB1</i>   | <i>SSR1</i>      | hsa-miR-150    | Medium miRNA |
| <i>SV2B</i>    | <i>NDRG3</i>     | hsa-miR-485-5p | High miRNA   |
| <i>ATP8A2</i>  | <i>ST8SIA3</i>   | hsa-miR-495    | High miRNA   |
| <i>DOK4</i>    | <i>JUP</i>       | hsa-miR-214    | High miRNA   |
| <i>SERBP1</i>  | <i>C1orf216</i>  | hsa-miR-329    | Low miRNA    |
| <i>PIGR</i>    | <i>PTPRB</i>     | hsa-miR-24     | Low miRNA    |
| <i>ACTR8</i>   | <i>OSBPL2</i>    | hsa-miR-607    | Low miRNA    |
| <i>CRTC1</i>   | <i>ADORA1</i>    | hsa-miR-24     | High miRNA   |
| <i>SH3TC2</i>  | <i>RAPGEF3</i>   | hsa-miR-484    | Medium miRNA |
| <i>BCL2L2</i>  | <i>RAPGEFL1</i>  | hsa-miR-15a    | Low miRNA    |
| <i>SNX27</i>   | <i>CTNND1</i>    | hsa-miR-527    | Medium miRNA |
| <i>SYP</i>     | <i>CNNM1</i>     | hsa-miR-608    | Low miRNA    |
| <i>ATP2B3</i>  | <i>STXBP5L</i>   | hsa-miR-105    | Low miRNA    |
| <i>SLK</i>     | <i>UCHL5</i>     | hsa-miR-607    | High miRNA   |
| <i>RUFY3</i>   | <i>SEMA5A</i>    | hsa-miR-186    | Medium miRNA |
| <i>SCN3B</i>   | <i>CAMK2A</i>    | hsa-miR-485-5p | High miRNA   |
| <i>SLC7A2</i>  | <i>ATP8A1</i>    | hsa-miR-495    | Low miRNA    |
| <i>PCMI</i>    | <i>GOSR1</i>     | hsa-miR-150    | Medium miRNA |
| <i>PEX13</i>   | <i>ABI2</i>      | hsa-miR-302d   | Low miRNA    |
| <i>SV2B</i>    | <i>CAMK2G</i>    | hsa-miR-495    | High miRNA   |
| <i>CCDC68</i>  | <i>ADAMTSL3</i>  | hsa-miR-340    | Medium miRNA |
| <i>CSNK1G3</i> | <i>CPSF6</i>     | hsa-miR-603    | Low miRNA    |
| <i>BSN</i>     | <i>NMNAT2</i>    | hsa-miR-185    | High miRNA   |
| <i>NR3C1</i>   | <i>ARHGEF3</i>   | hsa-miR-181a   | Low miRNA    |
| <i>CLDN1</i>   | <i>SFTPB</i>     | hsa-miR-600    | High miRNA   |
| <i>SNX27</i>   | <i>CBFB</i>      | hsa-miR-607    | Low miRNA    |
| <i>PRPF4B</i>  | <i>SMARCA5</i>   | hsa-miR-606    | Low miRNA    |
| <i>POU2F1</i>  | <i>ASB1</i>      | hsa-miR-372    | Low miRNA    |

|                 |                 |                |              |
|-----------------|-----------------|----------------|--------------|
| <i>SH3TC2</i>   | <i>DLG2</i>     | hsa-miR-185    | High miRNA   |
| <i>MECP2</i>    | <i>ZC3H11A</i>  | hsa-miR-186    | High miRNA   |
| <i>MRPL19</i>   | <i>PEX19</i>    | hsa-miR-539    | Low miRNA    |
| <i>UBE4B</i>    | <i>CBFB</i>     | hsa-miR-607    | Low miRNA    |
| <i>GRIN2A</i>   | <i>KIAA0319</i> | hsa-miR-326    | High miRNA   |
| <i>POLR2D</i>   | <i>CNOT8</i>    | hsa-miR-607    | Low miRNA    |
| <i>GREM2</i>    | <i>DLGAP2</i>   | hsa-miR-205    | Low miRNA    |
| <i>CLEC2D</i>   | <i>RHOH</i>     | hsa-miR-570    | Low miRNA    |
| <i>EPHB2</i>    | <i>UCK2</i>     | hsa-miR-593    | Medium miRNA |
| <i>GFRA1</i>    | <i>AGTR2</i>    | hsa-miR-607    | Low miRNA    |
| <i>SORBS3</i>   | <i>UBTF</i>     | hsa-miR-608    | Low miRNA    |
| <i>PDLIM5</i>   | <i>OSBPL2</i>   | hsa-miR-607    | Low miRNA    |
| <i>PDE4D</i>    | <i>SLC7A2</i>   | hsa-miR-495    | Medium miRNA |
| <i>THSD4</i>    | <i>EHF</i>      | hsa-miR-607    | High miRNA   |
| <i>POU2AF1</i>  | <i>IRF4</i>     | hsa-miR-203    | Low miRNA    |
| <i>HEG1</i>     | <i>GOSR1</i>    | hsa-miR-106b   | Medium miRNA |
| <i>ATRN</i>     | <i>ASB1</i>     | hsa-miR-607    | Low miRNA    |
| <i>SSR1</i>     | <i>ABI2</i>     | hsa-miR-150    | Medium miRNA |
| <i>TNS1</i>     | <i>GOSR1</i>    | hsa-miR-326    | Low miRNA    |
| <i>AP2B1</i>    | <i>MAPRE2</i>   | hsa-miR-583    | Low miRNA    |
| <i>HELZ</i>     | <i>ASB1</i>     | hsa-miR-607    | Low miRNA    |
| <i>YTHDC1</i>   | <i>OSBPL2</i>   | hsa-miR-607    | Low miRNA    |
| <i>FZR1</i>     | <i>HCFC1</i>    | hsa-miR-608    | Low miRNA    |
| <i>SLC8A2</i>   | <i>GRIN2A</i>   | hsa-miR-7      | High miRNA   |
| <i>C17orf63</i> | <i>DVL3</i>     | hsa-miR-625    | Low miRNA    |
| <i>NCDN</i>     | <i>PRKAR1B</i>  | hsa-miR-637    | Low miRNA    |
| <i>SH3PXD2A</i> | <i>CHD5</i>     | hsa-miR-149    | High miRNA   |
| <i>PAFAH1B1</i> | <i>RTF1</i>     | hsa-miR-603    | Low miRNA    |
| <i>SNX19</i>    | <i>OSBPL2</i>   | hsa-miR-607    | Low miRNA    |
| <i>CACNG2</i>   | <i>KIAA1045</i> | hsa-miR-637    | Low miRNA    |
| <i>RANBP2</i>   | <i>ARHGAP5</i>  | hsa-miR-607    | Low miRNA    |
| <i>ZEB1</i>     | <i>DOCK4</i>    | hsa-miR-655    | High miRNA   |
| <i>RAP2B</i>    | <i>TBC1D4</i>   | hsa-miR-142-5p | High miRNA   |
| <i>AGPS</i>     | <i>CYP20A1</i>  | hsa-miR-656    | Low miRNA    |
| <i>NHLH2</i>    | <i>ONECUT2</i>  | hsa-miR-561    | Medium miRNA |
| <i>CUL4B</i>    | <i>EXOC5</i>    | hsa-miR-583    | Low miRNA    |

|                 |                  |                |              |
|-----------------|------------------|----------------|--------------|
| <i>MYO1D</i>    | <i>CLMN</i>      | hsa-miR-608    | Low miRNA    |
| <i>ULK2</i>     | <i>C18orf1</i>   | hsa-miR-607    | Low miRNA    |
| <i>QKI</i>      | <i>GPM6B</i>     | hsa-miR-579    | High miRNA   |
| <i>ULK2</i>     | <i>PAIP2B</i>    | hsa-miR-515-5p | Low miRNA    |
| <i>KIAA0408</i> | <i>DLG3</i>      | hsa-miR-646    | Low miRNA    |
| <i>QKI</i>      | <i>TCF4</i>      | hsa-miR-203    | High miRNA   |
| <i>TPM3</i>     | <i>CAMK2A</i>    | hsa-miR-485-5p | High miRNA   |
| <i>SUZ12</i>    | <i>TNPO1</i>     | hsa-miR-607    | High miRNA   |
| <i>HEG1</i>     | <i>EIF2C1</i>    | hsa-miR-106b   | Medium miRNA |
| <i>PDLIM5</i>   | <i>ASB1</i>      | hsa-miR-372    | Low miRNA    |
| <i>PPM1H</i>    | <i>AAK1</i>      | hsa-miR-214    | Low miRNA    |
| <i>ARRB1</i>    | <i>SFTPB</i>     | hsa-miR-608    | Low miRNA    |
| <i>AGPS</i>     | <i>KPNA4</i>     | hsa-miR-579    | Low miRNA    |
| <i>DSC3</i>     | <i>SLC12A6</i>   | hsa-miR-203    | Medium miRNA |
| <i>GCN1L1</i>   | <i>NRIP1</i>     | hsa-miR-607    | Low miRNA    |
| <i>MTMR9</i>    | <i>PBRM1</i>     | hsa-miR-607    | Low miRNA    |
| <i>OPA1</i>     | <i>OSBPL2</i>    | hsa-miR-607    | Low miRNA    |
| <i>SSR1</i>     | <i>CCPG1</i>     | hsa-miR-545    | Low miRNA    |
| <i>NCDN</i>     | <i>BSN</i>       | hsa-miR-608    | Low miRNA    |
| <i>THRAP3</i>   | <i>BRAP</i>      | hsa-miR-579    | Low miRNA    |
| <i>DDX21</i>    | <i>TRAM2</i>     | hsa-miR-31     | High miRNA   |
| <i>ATP11B</i>   | <i>RAP2B</i>     | hsa-miR-186    | Medium miRNA |
| <i>FOXN2</i>    | <i>SP4</i>       | hsa-miR-381    | Medium miRNA |
| <i>ZBTB6</i>    | <i>THRAP3</i>    | hsa-miR-561    | Low miRNA    |
| <i>OPA3</i>     | <i>MAP3K2</i>    | hsa-miR-302b   | Low miRNA    |
| <i>ARHGAP5</i>  | <i>WIPF2</i>     | hsa-miR-607    | Low miRNA    |
| <i>AGPS</i>     | <i>GOSR2</i>     | hsa-miR-603    | Low miRNA    |
| <i>BCL2L2</i>   | <i>GABARAPL1</i> | hsa-miR-15b    | Low miRNA    |
| <i>WDFY3</i>    | <i>LIMCH1</i>    | hsa-miR-620    | Low miRNA    |
| <i>YWHAZ</i>    | <i>NUDT4</i>     | hsa-miR-544    | Low miRNA    |
| <i>SEC63</i>    | <i>CSNK1A1</i>   | hsa-miR-186    | Medium miRNA |
| <i>DISC1</i>    | <i>SEMA5A</i>    | hsa-miR-203    | High miRNA   |
| <i>C11orf41</i> | <i>KIF3A</i>     | hsa-miR-335    | High miRNA   |
| <i>TRPS1</i>    | <i>TTC28</i>     | hsa-miR-204    | Medium miRNA |
| <i>YTHDC1</i>   | <i>KIAA0226</i>  | hsa-miR-607    | Low miRNA    |
| <i>PAK6</i>     | <i>FBXO41</i>    | hsa-miR-185    | High miRNA   |

|                 |                 |                |              |
|-----------------|-----------------|----------------|--------------|
| <i>USP46</i>    | <i>PBLD</i>     | hsa-miR-519d   | Low miRNA    |
| <i>PRG4</i>     | <i>GABRR1</i>   | hsa-miR-410    | High miRNA   |
| <i>TSC1</i>     | <i>HGSNAT</i>   | hsa-miR-204    | Medium miRNA |
| <i>KCNC1</i>    | <i>KIAA0319</i> | hsa-miR-326    | High miRNA   |
| <i>APPBP2</i>   | <i>C3orf63</i>  | hsa-miR-607    | Low miRNA    |
| <i>SSBP3</i>    | <i>RAB3IL1</i>  | hsa-miR-608    | Low miRNA    |
| <i>PPP1R12B</i> | <i>HIF1AN</i>   | hsa-miR-372    | Low miRNA    |
| <i>TBL1XR1</i>  | <i>PAFAH1B1</i> | hsa-miR-16     | Medium miRNA |
| <i>SH3TC2</i>   | <i>AAK1</i>     | hsa-miR-30b    | Medium miRNA |
| <i>APPL1</i>    | <i>PRPF4B</i>   | hsa-miR-607    | Low miRNA    |
| <i>PDE4B</i>    | <i>FZD3</i>     | hsa-miR-369-3p | High miRNA   |
| <i>MEF2C</i>    | <i>TRIM23</i>   | hsa-miR-410    | High miRNA   |
| <i>CNTNAP2</i>  | <i>CBX7</i>     | hsa-miR-218    | High miRNA   |
| <i>GRIN2A</i>   | <i>CNNM1</i>    | hsa-miR-326    | High miRNA   |
| <i>ZNF24</i>    | <i>YTHDC1</i>   | hsa-miR-607    | Low miRNA    |
| <i>LARP4</i>    | <i>NRIP1</i>    | hsa-miR-607    | Low miRNA    |
| <i>PTPRB</i>    | <i>VGLL3</i>    | hsa-miR-579    | Low miRNA    |
| <i>FMO2</i>     | <i>OCN</i>      | hsa-miR-340    | Medium miRNA |
| <i>GGCX</i>     | <i>BZW1</i>     | hsa-miR-607    | Low miRNA    |
| <i>TPPP</i>     | <i>SEC14L5</i>  | hsa-miR-661    | Low miRNA    |
| <i>CFLAR</i>    | <i>LARP4</i>    | hsa-miR-603    | Low miRNA    |
| <i>FAM134A</i>  | <i>GLG1</i>     | hsa-miR-650    | High miRNA   |
| <i>TAP2</i>     | <i>GCNT2</i>    | hsa-miR-136    | Medium miRNA |
| <i>FUT2</i>     | <i>POU2AF1</i>  | hsa-miR-485-5p | Low miRNA    |
| <i>CACNG2</i>   | <i>IQSEC3</i>   | hsa-miR-637    | Low miRNA    |
| <i>MRPL19</i>   | <i>YWHAZ</i>    | hsa-miR-544    | Low miRNA    |
| <i>C12orf5</i>  | <i>SELT</i>     | hsa-miR-520g   | Low miRNA    |
| <i>CCNJ</i>     | <i>DHTKD1</i>   | hsa-miR-302d   | Low miRNA    |
| <i>OPA3</i>     | <i>MAP3K2</i>   | hsa-miR-302c   | Low miRNA    |
| <i>ADIPOR2</i>  | <i>FOXK2</i>    | hsa-miR-384    | Low miRNA    |
| <i>GPR107</i>   | <i>RNF14</i>    | hsa-miR-587    | Low miRNA    |
| <i>CSNK1A1</i>  | <i>PKD2</i>     | hsa-miR-186    | Medium miRNA |
| <i>LPGAT1</i>   | <i>NRIP1</i>    | hsa-miR-656    | Low miRNA    |
| <i>SLC12A5</i>  | <i>IQSEC3</i>   | hsa-miR-663    | Low miRNA    |
| <i>QKI</i>      | <i>TCF4</i>     | hsa-miR-579    | High miRNA   |
| <i>STYK1</i>    | <i>CACNG2</i>   | hsa-miR-204    | Medium miRNA |



|                 |                 |              |              |
|-----------------|-----------------|--------------|--------------|
| <i>KRAS</i>     | <i>PTCD3</i>    | hsa-miR-217  | Medium miRNA |
| <i>EFHD2</i>    | <i>SSBP3</i>    | hsa-miR-608  | Low miRNA    |
| <i>IPO9</i>     | <i>KIAA0226</i> | hsa-miR-372  | High miRNA   |
| <i>SENP5</i>    | <i>KLK10</i>    | hsa-miR-612  | High miRNA   |
| <i>TBL1XR1</i>  | <i>KPNA4</i>    | hsa-miR-579  | Low miRNA    |
| <i>FMO2</i>     | <i>LMO7</i>     | hsa-miR-340  | Medium miRNA |
| <i>DDX21</i>    | <i>LPP</i>      | hsa-miR-31   | High miRNA   |
| <i>TK2</i>      | <i>SLC7A8</i>   | hsa-miR-766  | Low miRNA    |
| <i>AP1G1</i>    | <i>GFPT1</i>    | hsa-miR-520h | Low miRNA    |
| <i>CPEB3</i>    | <i>MEF2C</i>    | hsa-miR-570  | Low miRNA    |
| <i>TACC1</i>    | <i>USP9X</i>    | hsa-miR-570  | High miRNA   |
| <i>FBXO41</i>   | <i>AAK1</i>     | hsa-miR-302d | Low miRNA    |
| <i>KIAA1045</i> | <i>GRIN2A</i>   | hsa-miR-593  | Low miRNA    |
| <i>AAK1</i>     | <i>CNNM1</i>    | hsa-miR-326  | High miRNA   |
| <i>C16orf58</i> | <i>PIP4K2B</i>  | hsa-miR-661  | Low miRNA    |
| <i>PRSS16</i>   | <i>PERP</i>     | hsa-miR-539  | High miRNA   |
| <i>C1orf216</i> | <i>LARP4</i>    | hsa-miR-603  | Low miRNA    |
| <i>KPNA4</i>    | <i>EXOC5</i>    | hsa-miR-410  | High miRNA   |
| <i>PRKCA</i>    | <i>TNS1</i>     | hsa-miR-326  | Low miRNA    |
| <i>DCP2</i>     | <i>NDFIP1</i>   | hsa-miR-105  | Low miRNA    |
| <i>PRKCI</i>    | <i>ABCE1</i>    | hsa-miR-656  | Low miRNA    |
| <i>ST8SIA3</i>  | <i>ONECUT2</i>  | hsa-miR-561  | High miRNA   |
| <i>SNX27</i>    | <i>ZMIZ1</i>    | hsa-miR-612  | Medium miRNA |
| <i>YTHDC1</i>   | <i>ATRN</i>     | hsa-miR-607  | Low miRNA    |
| <i>YME1L1</i>   | <i>MCTS1</i>    | hsa-miR-411  | Low miRNA    |
| <i>GNG13</i>    | <i>AAK1</i>     | hsa-miR-600  | Low miRNA    |
| <i>POU2AF1</i>  | <i>IL21R</i>    | hsa-miR-766  | Low miRNA    |
| <i>FBXO41</i>   | <i>AAK1</i>     | hsa-miR-302a | Low miRNA    |
| <i>CDC42BPB</i> | <i>PIP5K1C</i>  | hsa-miR-608  | Low miRNA    |
| <i>SORL1</i>    | <i>ARHGAP5</i>  | hsa-miR-607  | Low miRNA    |
| <i>KIF1B</i>    | <i>NCAN</i>     | hsa-miR-599  | High miRNA   |
| <i>CCDC68</i>   | <i>SLCO4C1</i>  | hsa-miR-340  | Medium miRNA |
| <i>PGR</i>      | <i>THSD4</i>    | hsa-miR-607  | High miRNA   |
| <i>APPL1</i>    | <i>APPBP2</i>   | hsa-miR-607  | Low miRNA    |
| <i>HEG1</i>     | <i>EIF2C1</i>   | hsa-miR-106a | Low miRNA    |
| <i>C6orf120</i> | <i>COX11</i>    | hsa-miR-200b | High miRNA   |

|                |                |             |              |
|----------------|----------------|-------------|--------------|
| <i>STXBP5L</i> | <i>GRIN2A</i>  | hsa-miR-618 | Low miRNA    |
| <i>JHDM1D</i>  | <i>ZEB2</i>    | hsa-miR-656 | Low miRNA    |
| <i>KHDRBS2</i> | <i>CAMK2G</i>  | hsa-miR-495 | High miRNA   |
| <i>JHDM1D</i>  | <i>ZEB2</i>    | hsa-miR-561 | Low miRNA    |
| <i>CEP68</i>   | <i>HGSNAT</i>  | hsa-miR-204 | Medium miRNA |
| <i>SV2B</i>    | <i>STXBP5L</i> | hsa-miR-758 | High miRNA   |
| <i>IPO9</i>    | <i>GOSR1</i>   | hsa-miR-150 | Medium miRNA |
| <i>AAK1</i>    | <i>CHD5</i>    | hsa-miR-149 | High miRNA   |
| <i>GCN1L1</i>  | <i>TMF1</i>    | hsa-miR-607 | Low miRNA    |
| <i>FBXO41</i>  | <i>VIPR1</i>   | hsa-miR-138 | High miRNA   |
| <i>NMNAT2</i>  | <i>ULK2</i>    | hsa-miR-185 | High miRNA   |
| <i>SS18</i>    | <i>TOLLIP</i>  | hsa-miR-144 | Low miRNA    |
| <i>RNF216</i>  | <i>ARFRP1</i>  | hsa-miR-661 | Low miRNA    |
| <i>UTP14C</i>  | <i>TRIM33</i>  | hsa-miR-586 | Low miRNA    |
| <i>SH3TC2</i>  | <i>TPPP</i>    | hsa-miR-484 | Medium miRNA |
| <i>PTGFR</i>   | <i>SGCD</i>    | hsa-miR-384 | High miRNA   |
| <i>PRKCI</i>   | <i>NRIP1</i>   | hsa-miR-656 | Low miRNA    |
| <i>NBR1</i>    | <i>HGSNAT</i>  | hsa-miR-204 | Medium miRNA |
| <i>CAB39</i>   | <i>ACTR2</i>   | hsa-miR-495 | Low miRNA    |
| <i>EPB49</i>   | <i>IQSEC3</i>  | hsa-miR-637 | Low miRNA    |
| <i>RTF1</i>    | <i>SSR1</i>    | hsa-miR-603 | Low miRNA    |
| <i>NEFL</i>    | <i>AAK1</i>    | hsa-miR-203 | High miRNA   |
| <i>FAM105A</i> | <i>ENTPD1</i>  | hsa-miR-641 | Low miRNA    |
| <i>GABRA1</i>  | <i>TRHDE</i>   | hsa-miR-580 | Low miRNA    |
| <i>YTHDC1</i>  | <i>ASB1</i>    | hsa-miR-607 | Low miRNA    |
| <i>BSN</i>     | <i>CNNM1</i>   | hsa-miR-608 | Low miRNA    |
| <i>TMED5</i>   | <i>GSPT1</i>   | hsa-miR-544 | Low miRNA    |
| <i>SSR3</i>    | <i>KPNA4</i>   | hsa-miR-570 | Low miRNA    |
| <i>UBE4B</i>   | <i>SNX19</i>   | hsa-miR-607 | Low miRNA    |
| <i>SORBS3</i>  | <i>MARK2</i>   | hsa-miR-608 | Low miRNA    |
| <i>NUDT4</i>   | <i>DGAT1</i>   | hsa-miR-661 | Low miRNA    |
| <i>VPS37C</i>  | <i>MAFG</i>    | hsa-miR-29a | High miRNA   |
| <i>SMARCC2</i> | <i>MLL</i>     | hsa-miR-150 | Medium miRNA |
| <i>PTPRB</i>   | <i>FMO2</i>    | hsa-miR-607 | Medium miRNA |
| <i>C3orf58</i> | <i>ABCA5</i>   | hsa-miR-559 | Medium miRNA |
| <i>SSR1</i>    | <i>RNF38</i>   | hsa-miR-603 | Low miRNA    |

|                 |                 |                |              |
|-----------------|-----------------|----------------|--------------|
| <i>ENAH</i>     | <i>SNX27</i>    | hsa-miR-607    | Low miRNA    |
| <i>TACC1</i>    | <i>USP9X</i>    | hsa-miR-134    | Low miRNA    |
| <i>SEC63</i>    | <i>PPP3CA</i>   | hsa-miR-495    | Low miRNA    |
| <i>MME</i>      | <i>MCTP2</i>    | hsa-miR-561    | Medium miRNA |
| <i>BSN</i>      | <i>AAK1</i>     | hsa-miR-539    | High miRNA   |
| <i>MARK2</i>    | <i>CRTC1</i>    | hsa-miR-608    | Low miRNA    |
| <i>PRKCH</i>    | <i>C18orf1</i>  | hsa-miR-578    | Low miRNA    |
| <i>NPAS3</i>    | <i>CALM1</i>    | hsa-miR-579    | High miRNA   |
| <i>TK2</i>      | <i>SLC7A11</i>  | hsa-miR-522    | Low miRNA    |
| <i>FXR1</i>     | <i>WDR82</i>    | hsa-miR-607    | Low miRNA    |
| <i>SH3TC2</i>   | <i>ADARB2</i>   | hsa-miR-769-5p | High miRNA   |
| <i>ZFHX3</i>    | <i>MAP3K2</i>   | hsa-miR-579    | Low miRNA    |
| <i>QKI</i>      | <i>FAM70A</i>   | hsa-miR-200a   | Medium miRNA |
| <i>SEC63</i>    | <i>TMEM30A</i>  | hsa-miR-656    | Low miRNA    |
| <i>AAK1</i>     | <i>ADARB2</i>   | hsa-miR-484    | Medium miRNA |
| <i>IQCE</i>     | <i>ARFRP1</i>   | hsa-miR-661    | Low miRNA    |
| <i>MNT</i>      | <i>MGRN1</i>    | hsa-miR-608    | Medium miRNA |
| <i>TBC1D12</i>  | <i>LPGAT1</i>   | hsa-miR-607    | Low miRNA    |
| <i>BSN</i>      | <i>EPB41L1</i>  | hsa-miR-149    | High miRNA   |
| <i>HIC2</i>     | <i>MAPT</i>     | hsa-miR-637    | Low miRNA    |
| <i>FZR1</i>     | <i>OPA3</i>     | hsa-miR-608    | Low miRNA    |
| <i>ZER1</i>     | <i>FBXL18</i>   | hsa-miR-661    | Low miRNA    |
| <i>CBFA2T2</i>  | <i>KCNN3</i>    | hsa-miR-24     | High miRNA   |
| <i>CAMK2A</i>   | <i>KIAA0319</i> | hsa-miR-326    | High miRNA   |
| <i>SPAG9</i>    | <i>CAPRN1</i>   | hsa-miR-656    | Low miRNA    |
| <i>TOMM70A</i>  | <i>APPBP2</i>   | hsa-miR-607    | Low miRNA    |
| <i>TK2</i>      | <i>GOSR1</i>    | hsa-miR-326    | Low miRNA    |
| <i>CUL4B</i>    | <i>MAP3K2</i>   | hsa-miR-579    | Low miRNA    |
| <i>RNF125</i>   | <i>IL17RA</i>   | hsa-miR-612    | Low miRNA    |
| <i>FMO2</i>     | <i>SLC6A14</i>  | hsa-miR-340    | Medium miRNA |
| <i>DCP2</i>     | <i>DCUN1D1</i>  | hsa-miR-561    | Low miRNA    |
| <i>ATP6V0A1</i> | <i>TRIM3</i>    | hsa-miR-608    | Low miRNA    |
| <i>CLCA2</i>    | <i>TMEM30B</i>  | hsa-miR-495    | Low miRNA    |
| <i>QKI</i>      | <i>TOMM70A</i>  | hsa-miR-607    | Low miRNA    |
| <i>ZEB1</i>     | <i>QKI</i>      | hsa-miR-203    | High miRNA   |
| <i>TM9SF3</i>   | <i>PKD2</i>     | hsa-miR-607    | Low miRNA    |

|                 |                  |                |              |
|-----------------|------------------|----------------|--------------|
| <i>MME</i>      | <i>PTGFR</i>     | hsa-miR-539    | High miRNA   |
| <i>PRPF40A</i>  | <i>RAB11FIP2</i> | hsa-miR-410    | Low miRNA    |
| <i>PAX8</i>     | <i>RAPGEF3</i>   | hsa-miR-324-3p | Low miRNA    |
| <i>DDX21</i>    | <i>CHST3</i>     | hsa-miR-607    | Low miRNA    |
| <i>KIAA0513</i> | <i>MAST3</i>     | hsa-miR-766    | Medium miRNA |
| <i>TBL1XR1</i>  | <i>TJP1</i>      | hsa-miR-105    | Low miRNA    |
| <i>SCN3B</i>    | <i>RAB6B</i>     | hsa-miR-485-5p | High miRNA   |
| <i>POLI</i>     | <i>S100PBP</i>   | hsa-miR-583    | Low miRNA    |
| <i>FGF2</i>     | <i>MAP3K2</i>    | hsa-miR-369-3p | Low miRNA    |
| <i>UBE2J1</i>   | <i>MRPL19</i>    | hsa-miR-633    | Low miRNA    |
| <i>SEC63</i>    | <i>SMARCA5</i>   | hsa-miR-186    | Medium miRNA |
| <i>ZEB1</i>     | <i>KIF3A</i>     | hsa-miR-203    | High miRNA   |
| <i>SLC12A6</i>  | <i>DSG3</i>      | hsa-miR-211    | Low miRNA    |
| <i>CLEC2D</i>   | <i>STX11</i>     | hsa-miR-568    | Medium miRNA |
| <i>SNX27</i>    | <i>OPA1</i>      | hsa-miR-607    | Low miRNA    |
| <i>FZD3</i>     | <i>ASB1</i>      | hsa-miR-372    | Low miRNA    |
| <i>TJP1</i>     | <i>SS18</i>      | hsa-miR-144    | Low miRNA    |
| <i>FRS2</i>     | <i>MAP3K2</i>    | hsa-miR-96     | Low miRNA    |
| <i>PURA</i>     | <i>HIPK2</i>     | hsa-miR-15b    | Low miRNA    |
| <i>ARRB1</i>    | <i>AOC3</i>      | hsa-miR-150    | High miRNA   |
| <i>PPIL2</i>    | <i>POLH</i>      | hsa-miR-661    | Low miRNA    |
| <i>TNFSF15</i>  | <i>STEAP4</i>    | hsa-miR-369-3p | Medium miRNA |
| <i>LASP1</i>    | <i>LARP4</i>     | hsa-miR-603    | Low miRNA    |
| <i>PTP4A1</i>   | <i>FAM110B</i>   | hsa-miR-607    | Low miRNA    |
| <i>PPM1H</i>    | <i>TULP4</i>     | hsa-miR-607    | Low miRNA    |
| <i>ZFHX3</i>    | <i>THRAP3</i>    | hsa-miR-579    | Low miRNA    |
| <i>ZBTB6</i>    | <i>ZNF238</i>    | hsa-miR-561    | Low miRNA    |
| <i>SH3TC2</i>   | <i>LDB3</i>      | hsa-miR-607    | Low miRNA    |
| <i>THRAP3</i>   | <i>MAP3K2</i>    | hsa-miR-579    | Low miRNA    |
| <i>SEC16A</i>   | <i>EIF2C1</i>    | hsa-miR-519a   | Low miRNA    |
| <i>C17orf63</i> | <i>TSC1</i>      | hsa-miR-625    | Low miRNA    |
| <i>TNPO1</i>    | <i>HNRNPA0</i>   | hsa-miR-186    | Medium miRNA |
| <i>SLC17A6</i>  | <i>SV2B</i>      | hsa-miR-495    | High miRNA   |
| <i>TRAF1</i>    | <i>TRAF3</i>     | hsa-miR-214    | Low miRNA    |
| <i>ELAVL1</i>   | <i>KPNA1</i>     | hsa-miR-577    | Low miRNA    |
| <i>SIRPA</i>    | <i>ADORA1</i>    | hsa-miR-24     | High miRNA   |

|                 |                 |                |              |
|-----------------|-----------------|----------------|--------------|
| <i>SPTBN1</i>   | <i>KIF3A</i>    | hsa-miR-203    | High miRNA   |
| <i>RAPGEF3</i>  | <i>ADARB2</i>   | hsa-miR-484    | Medium miRNA |
| <i>ENAH</i>     | <i>PREPL</i>    | hsa-miR-607    | Low miRNA    |
| <i>CSNK1A1</i>  | <i>ZNF148</i>   | hsa-miR-186    | Medium miRNA |
| <i>TOM1L2</i>   | <i>FBXL18</i>   | hsa-miR-650    | Medium miRNA |
| <i>BSN</i>      | <i>KCNS1</i>    | hsa-miR-326    | High miRNA   |
| <i>ABI2</i>     | <i>TOLLIP</i>   | hsa-miR-144    | Low miRNA    |
| <i>PFAFH1B1</i> | <i>PRPF4B</i>   | hsa-miR-607    | Low miRNA    |
| <i>CBX5</i>     | <i>PPP3CA</i>   | hsa-miR-381    | Low miRNA    |
| <i>CNTN2</i>    | <i>SH3TC2</i>   | hsa-miR-573    | Low miRNA    |
| <i>TSPYL1</i>   | <i>AAK1</i>     | hsa-miR-485-5p | High miRNA   |
| <i>LPHN1</i>    | <i>KIAA0513</i> | hsa-miR-623    | Low miRNA    |
| <i>RAB11A</i>   | <i>TM9SF3</i>   | hsa-miR-579    | Low miRNA    |
| <i>KPNA4</i>    | <i>PRKAR1A</i>  | hsa-miR-561    | Low miRNA    |
| <i>IPO9</i>     | <i>TRPS1</i>    | hsa-miR-372    | High miRNA   |
| <i>EIF2C1</i>   | <i>ZNF654</i>   | hsa-miR-578    | Low miRNA    |
| <i>ZMYM2</i>    | <i>TNRC6B</i>   | hsa-miR-181b   | High miRNA   |
| <i>CACNG2</i>   | <i>STXBP5L</i>  | hsa-miR-204    | Medium miRNA |
| <i>SLC22A3</i>  | <i>SDPR</i>     | hsa-miR-186    | Low miRNA    |
| <i>AGPS</i>     | <i>CSNK1G3</i>  | hsa-miR-603    | Low miRNA    |
| <i>MCTS1</i>    | <i>SELT</i>     | hsa-miR-520g   | Low miRNA    |
| <i>SLC7A11</i>  | <i>FUT9</i>     | hsa-miR-181d   | Low miRNA    |
| <i>NOTCH2</i>   | <i>CEP68</i>    | hsa-miR-204    | Medium miRNA |
| <i>RAB3B</i>    | <i>DSG3</i>     | hsa-miR-607    | High miRNA   |
| <i>ICK</i>      | <i>TTC33</i>    | hsa-miR-656    | Low miRNA    |
| <i>NCDN</i>     | <i>PDE1B</i>    | hsa-miR-608    | Low miRNA    |
| <i>QKI</i>      | <i>KAL1</i>     | hsa-miR-340    | Low miRNA    |
| <i>DHTKD1</i>   | <i>HIF1AN</i>   | hsa-miR-302d   | Low miRNA    |
| <i>KIAA1324</i> | <i>CYB561</i>   | hsa-miR-661    | Medium miRNA |
| <i>Clorf21</i>  | <i>NMNAT2</i>   | hsa-miR-185    | High miRNA   |
| <i>PPP1R2</i>   | <i>SMAD2</i>    | hsa-miR-410    | Low miRNA    |
| <i>CCDC68</i>   | <i>EMCN</i>     | hsa-miR-340    | Medium miRNA |
| <i>CEACAM5</i>  | <i>ATP8A1</i>   | hsa-miR-607    | High miRNA   |
| <i>KHDRBS2</i>  | <i>AAK1</i>     | hsa-miR-495    | High miRNA   |
| <i>GPM6A</i>    | <i>STX12</i>    | hsa-miR-607    | High miRNA   |
| <i>WIPF1</i>    | <i>GFPT1</i>    | hsa-miR-429    | Low miRNA    |

|                 |                 |                |              |
|-----------------|-----------------|----------------|--------------|
| <i>PCLO</i>     | <i>CACNB4</i>   | hsa-miR-218    | High miRNA   |
| <i>ASB1</i>     | <i>CPSF6</i>    | hsa-miR-607    | Low miRNA    |
| <i>NOS1AP</i>   | <i>GRIN2A</i>   | hsa-miR-136    | High miRNA   |
| <i>YWHAZ</i>    | <i>EIF1AX</i>   | hsa-miR-544    | Low miRNA    |
| <i>SLK</i>      | <i>CLCN4</i>    | hsa-miR-607    | Low miRNA    |
| <i>SH3BP2</i>   | <i>CRTC1</i>    | hsa-miR-24     | High miRNA   |
| <i>GPM6B</i>    | <i>PMP2</i>     | hsa-miR-579    | High miRNA   |
| <i>SYT13</i>    | <i>FBXO41</i>   | hsa-miR-205    | Low miRNA    |
| <i>NRP2</i>     | <i>PAPPA</i>    | hsa-miR-15a    | Medium miRNA |
| <i>NCDN</i>     | <i>SH3GLB2</i>  | hsa-miR-608    | Low miRNA    |
| <i>TRPS1</i>    | <i>ATXN1</i>    | hsa-miR-204    | Medium miRNA |
| <i>TRIM9</i>    | <i>LARP1</i>    | hsa-miR-150    | Medium miRNA |
| <i>SV2B</i>     | <i>DLGAP2</i>   | hsa-miR-539    | High miRNA   |
| <i>SELE</i>     | <i>ARRB1</i>    | hsa-miR-200a   | High miRNA   |
| <i>OSBPL2</i>   | <i>WIPF2</i>    | hsa-miR-607    | Low miRNA    |
| <i>LSAMP</i>    | <i>APC</i>      | hsa-miR-561    | High miRNA   |
| <i>SLC8A2</i>   | <i>IQSEC3</i>   | hsa-miR-608    | Low miRNA    |
| <i>FOXJ3</i>    | <i>RORA</i>     | hsa-miR-106a   | Low miRNA    |
| <i>SLC12A5</i>  | <i>FBXW7</i>    | hsa-miR-25     | Low miRNA    |
| <i>PHKA1</i>    | <i>RORA</i>     | hsa-miR-520e   | Low miRNA    |
| <i>SH3TC2</i>   | <i>SH3PXD2A</i> | hsa-miR-515-5p | Low miRNA    |
| <i>OSBPL8</i>   | <i>PYROXD1</i>  | hsa-miR-186    | Low miRNA    |
| <i>HTR2C</i>    | <i>PCLO</i>     | hsa-miR-203    | High miRNA   |
| <i>RAC2</i>     | <i>IKZF1</i>    | hsa-miR-608    | Low miRNA    |
| <i>CNKSR2</i>   | <i>RIMBP2</i>   | hsa-miR-30d    | Medium miRNA |
| <i>PRRG1</i>    | <i>SPTBN1</i>   | hsa-miR-616    | Low miRNA    |
| <i>SH3TC2</i>   | <i>CLMN</i>     | hsa-miR-181b   | High miRNA   |
| <i>AAK1</i>     | <i>PPP3CA</i>   | hsa-miR-495    | High miRNA   |
| <i>TRPS1</i>    | <i>SLC7A11</i>  | hsa-miR-579    | Low miRNA    |
| <i>APPBP2</i>   | <i>TCF4</i>     | hsa-miR-203    | Medium miRNA |
| <i>GALNT4</i>   | <i>EHF</i>      | hsa-miR-181c   | Low miRNA    |
| <i>NAP1L1</i>   | <i>PPP1R12B</i> | hsa-miR-511    | Low miRNA    |
| <i>ZNF592</i>   | <i>RANBP3</i>   | hsa-miR-637    | Low miRNA    |
| <i>ARL5A</i>    | <i>COX11</i>    | hsa-miR-200b   | High miRNA   |
| <i>PAFAH1B1</i> | <i>GOSR2</i>    | hsa-miR-603    | Low miRNA    |
| <i>FPGT</i>     | <i>SSRI</i>     | hsa-miR-603    | Low miRNA    |

|                |                 |                |              |
|----------------|-----------------|----------------|--------------|
| <i>SH3TC2</i>  | <i>LHPP</i>     | hsa-miR-608    | Low miRNA    |
| <i>LARP4</i>   | <i>MAP3K2</i>   | hsa-miR-559    | Low miRNA    |
| <i>SOX2</i>    | <i>TCF4</i>     | hsa-miR-557    | Low miRNA    |
| <i>GCN1L1</i>  | <i>UBP1</i>     | hsa-miR-607    | Low miRNA    |
| <i>LPGAT1</i>  | <i>DNM3</i>     | hsa-miR-607    | Low miRNA    |
| <i>ASTN1</i>   | <i>LSAMP</i>    | hsa-miR-544    | High miRNA   |
| <i>KIF5C</i>   | <i>ARHGEF6</i>  | hsa-miR-559    | High miRNA   |
| <i>ABR</i>     | <i>DOCK3</i>    | hsa-miR-125b   | High miRNA   |
| <i>TBL1XR1</i> | <i>RNF38</i>    | hsa-miR-367    | Low miRNA    |
| <i>TARDBP</i>  | <i>ATRN</i>     | hsa-miR-607    | Low miRNA    |
| <i>CTSB</i>    | <i>EMR2</i>     | hsa-miR-150    | Low miRNA    |
| <i>ZFH3</i>    | <i>MTM1</i>     | hsa-miR-570    | Low miRNA    |
| <i>LSAMP</i>   | <i>SEMA6A</i>   | hsa-miR-147    | High miRNA   |
| <i>EIF1AX</i>  | <i>ATRN</i>     | hsa-miR-544    | Low miRNA    |
| <i>SV2B</i>    | <i>KIAA0319</i> | hsa-miR-23a    | Low miRNA    |
| <i>PRKACB</i>  | <i>GSPT2</i>    | hsa-miR-607    | High miRNA   |
| <i>SSR1</i>    | <i>CBFB</i>     | hsa-miR-802    | Low miRNA    |
| <i>FBXO41</i>  | <i>CNNM1</i>    | hsa-miR-326    | High miRNA   |
| <i>TNPO1</i>   | <i>GOSR1</i>    | hsa-miR-186    | Medium miRNA |
| <i>GNA13</i>   | <i>FRS2</i>     | hsa-miR-96     | Low miRNA    |
| <i>SYT13</i>   | <i>SV2B</i>     | hsa-miR-527    | Medium miRNA |
| <i>PPM1H</i>   | <i>PIP5K1C</i>  | hsa-miR-661    | Low miRNA    |
| <i>AP1S2</i>   | <i>QKI</i>      | hsa-miR-561    | High miRNA   |
| <i>FGF7</i>    | <i>RAB3B</i>    | hsa-miR-607    | High miRNA   |
| <i>SSR1</i>    | <i>LASP1</i>    | hsa-miR-603    | Low miRNA    |
| <i>ARRB1</i>   | <i>KCNJ12</i>   | hsa-miR-125b   | High miRNA   |
| <i>GCN1L1</i>  | <i>PKD2</i>     | hsa-miR-607    | Low miRNA    |
| <i>PPM1H</i>   | <i>HLF</i>      | hsa-miR-570    | Low miRNA    |
| <i>JHDM1D</i>  | <i>ACVR2B</i>   | hsa-miR-369-3p | Medium miRNA |
| <i>BSN</i>     | <i>AAK1</i>     | hsa-miR-326    | High miRNA   |
| <i>FBXO41</i>  | <i>SEC14L5</i>  | hsa-miR-138    | High miRNA   |
| <i>TMED5</i>   | <i>SSR1</i>     | hsa-miR-607    | Low miRNA    |
| <i>THSD4</i>   | <i>KCNJ13</i>   | hsa-miR-607    | Medium miRNA |
| <i>YWHAZ</i>   | <i>USP9X</i>    | hsa-miR-544    | Low miRNA    |
| <i>AQP4</i>    | <i>SLC7A11</i>  | hsa-miR-607    | Low miRNA    |
| <i>UBE2J1</i>  | <i>SNX27</i>    | hsa-miR-607    | Low miRNA    |

|                 |                  |                |              |
|-----------------|------------------|----------------|--------------|
| <i>AZIN1</i>    | <i>PFN2</i>      | hsa-miR-520h   | Low miRNA    |
| <i>PDE1B</i>    | <i>CNNM1</i>     | hsa-miR-608    | Low miRNA    |
| <i>MIA3</i>     | <i>HECA</i>      | hsa-miR-607    | Low miRNA    |
| <i>RAB14</i>    | <i>ZMPSTE24</i>  | hsa-miR-577    | Low miRNA    |
| <i>EIF4E</i>    | <i>CNOT8</i>     | hsa-miR-607    | Low miRNA    |
| <i>TRPS1</i>    | <i>FAM125B</i>   | hsa-miR-204    | High miRNA   |
| <i>EXOC5</i>    | <i>ANKFY1</i>    | hsa-miR-186    | Low miRNA    |
| <i>CAMTA1</i>   | <i>RIMBP2</i>    | hsa-miR-106a   | Low miRNA    |
| <i>OPA3</i>     | <i>PGPEP1</i>    | hsa-miR-372    | Low miRNA    |
| <i>APPBP2</i>   | <i>FMR1</i>      | hsa-miR-607    | Low miRNA    |
| <i>SSR1</i>     | <i>CDS2</i>      | hsa-miR-603    | Low miRNA    |
| <i>C21orf91</i> | <i>DSG3</i>      | hsa-miR-655    | High miRNA   |
| <i>DCAKD</i>    | <i>FBXL18</i>    | hsa-miR-661    | Low miRNA    |
| <i>ELAVL1</i>   | <i>ABI2</i>      | hsa-miR-522    | Low miRNA    |
| <i>PCSK2</i>    | <i>PTPRT</i>     | hsa-miR-203    | High miRNA   |
| <i>ARNT2</i>    | <i>B3GAT1</i>    | hsa-miR-147    | High miRNA   |
| <i>ENAH</i>     | <i>PAICS</i>     | hsa-miR-485-5p | Low miRNA    |
| <i>APPBP2</i>   | <i>LRPPRC</i>    | hsa-miR-607    | Low miRNA    |
| <i>MBNL3</i>    | <i>CLEC2D</i>    | hsa-miR-587    | Low miRNA    |
| <i>AQP2</i>     | <i>NKX2-8</i>    | hsa-miR-637    | Medium miRNA |
| <i>KIAA1045</i> | <i>AAK1</i>      | hsa-miR-326    | High miRNA   |
| <i>PFAFH1B1</i> | <i>CPSF6</i>     | hsa-miR-607    | Low miRNA    |
| <i>ERBB2IP</i>  | <i>LSAMP</i>     | hsa-miR-144    | Medium miRNA |
| <i>NFATC2IP</i> | <i>HIP1</i>      | hsa-miR-520b   | Low miRNA    |
| <i>ACTR8</i>    | <i>IREB2</i>     | hsa-miR-607    | Low miRNA    |
| <i>TGOLN2</i>   | <i>PKD2</i>      | hsa-miR-607    | Low miRNA    |
| <i>FGF7</i>     | <i>SLC6A14</i>   | hsa-miR-340    | Medium miRNA |
| <i>PDCD6IP</i>  | <i>ZFAND5</i>    | hsa-miR-607    | Low miRNA    |
| <i>HOOK1</i>    | <i>ONECUT2</i>   | hsa-miR-409-3p | High miRNA   |
| <i>KIF1B</i>    | <i>SLC1A4</i>    | hsa-miR-545    | Medium miRNA |
| <i>TBL1XR1</i>  | <i>FGF2</i>      | hsa-miR-570    | Low miRNA    |
| <i>DCUN1D1</i>  | <i>PRKD3</i>     | hsa-miR-340    | Low miRNA    |
| <i>NCDN</i>     | <i>CACNG2</i>    | hsa-miR-608    | Low miRNA    |
| <i>PPM1H</i>    | <i>SERINC1</i>   | hsa-miR-607    | Low miRNA    |
| <i>BSN</i>      | <i>IQSEC3</i>    | hsa-miR-608    | Low miRNA    |
| <i>PAK6</i>     | <i>RAB11FIP1</i> | hsa-miR-185    | Medium miRNA |



|                 |                 |                |              |
|-----------------|-----------------|----------------|--------------|
| <i>ARNT2</i>    | <i>PMP2</i>     | hsa-miR-23a    | Medium miRNA |
| <i>CUL4B</i>    | <i>SSRI</i>     | hsa-miR-570    | Low miRNA    |
| <i>KCNC1</i>    | <i>PTPRN</i>    | hsa-miR-485-5p | High miRNA   |
| <i>GDPD5</i>    | <i>POLH</i>     | hsa-miR-588    | Low miRNA    |
| <i>SCN3B</i>    | <i>AAK1</i>     | hsa-miR-485-5p | High miRNA   |
| <i>MIA3</i>     | <i>GRIA3</i>    | hsa-miR-186    | Medium miRNA |
| <i>ZNF24</i>    | <i>ICK</i>      | hsa-miR-607    | Low miRNA    |
| <i>PITPNA</i>   | <i>CFLAR</i>    | hsa-miR-552    | Low miRNA    |
| <i>CEACAM5</i>  | <i>LGALS8</i>   | hsa-miR-607    | High miRNA   |
| <i>ZNF264</i>   | <i>ASB1</i>     | hsa-miR-214    | High miRNA   |
| <i>TK2</i>      | <i>TBC1D13</i>  | hsa-miR-326    | Low miRNA    |
| <i>AKAP5</i>    | <i>ATP8A1</i>   | hsa-miR-607    | Medium miRNA |
| <i>GTF2H5</i>   | <i>SELT</i>     | hsa-miR-520g   | Low miRNA    |
| <i>GSPT1</i>    | <i>C12orf5</i>  | hsa-miR-603    | Low miRNA    |
| <i>ANKFY1</i>   | <i>FBXL18</i>   | hsa-miR-326    | Low miRNA    |
| <i>TMEM127</i>  | <i>CEP68</i>    | hsa-miR-204    | Medium miRNA |
| <i>ADORA1</i>   | <i>KIF1C</i>    | hsa-miR-24     | High miRNA   |
| <i>TPPP</i>     | <i>SEC14L5</i>  | hsa-miR-370    | High miRNA   |
| <i>PAX8</i>     | <i>RAPGEF3</i>  | hsa-miR-326    | Medium miRNA |
| <i>CCRL1</i>    | <i>ADAMTSL3</i> | hsa-miR-340    | Medium miRNA |
| <i>MTMR9</i>    | <i>ICK</i>      | hsa-miR-607    | Low miRNA    |
| <i>FAM46C</i>   | <i>LAMP3</i>    | hsa-miR-93     | High miRNA   |
| <i>TRAF3</i>    | <i>MS4A1</i>    | hsa-miR-1      | Low miRNA    |
| <i>RAB6B</i>    | <i>KIAA0513</i> | hsa-miR-485-5p | High miRNA   |
| <i>PRDM2</i>    | <i>LANCL1</i>   | hsa-miR-211    | High miRNA   |
| <i>ARNT2</i>    | <i>LSAMP</i>    | hsa-miR-147    | High miRNA   |
| <i>AP1S2</i>    | <i>RAP2A</i>    | hsa-miR-561    | High miRNA   |
| <i>SH3TC2</i>   | <i>ADARB2</i>   | hsa-miR-484    | Medium miRNA |
| <i>SLC16A2</i>  | <i>FBXW2</i>    | hsa-miR-24     | High miRNA   |
| <i>RAB5A</i>    | <i>APH1A</i>    | hsa-miR-539    | Low miRNA    |
| <i>FOXRED2</i>  | <i>KIF1C</i>    | hsa-miR-552    | Low miRNA    |
| <i>POU3F2</i>   | <i>PMP2</i>     | hsa-miR-579    | High miRNA   |
| <i>NFATC2IP</i> | <i>HIP1</i>     | hsa-miR-520e   | Low miRNA    |
| <i>SMAD2</i>    | <i>KPNA1</i>    | hsa-miR-577    | Low miRNA    |
| <i>ZCCHC14</i>  | <i>TCF4</i>     | hsa-miR-141    | High miRNA   |
| <i>QKI</i>      | <i>TRIM2</i>    | hsa-miR-488    | Low miRNA    |

|                 |                  |                |              |
|-----------------|------------------|----------------|--------------|
| <i>SV2B</i>     | <i>DNAJC6</i>    | hsa-miR-23a    | Low miRNA    |
| <i>KCNK15</i>   | <i>PTPN3</i>     | hsa-miR-497    | Medium miRNA |
| <i>PPP1R16B</i> | <i>BSN</i>       | hsa-miR-149    | High miRNA   |
| <i>ZNF532</i>   | <i>USP46</i>     | hsa-miR-200c   | High miRNA   |
| <i>RAB22A</i>   | <i>CSNK1A1</i>   | hsa-miR-186    | Medium miRNA |
| <i>SLC35A5</i>  | <i>CAPRN1</i>    | hsa-miR-656    | Low miRNA    |
| <i>QKI</i>      | <i>FNDC3A</i>    | hsa-miR-561    | Low miRNA    |
| <i>PJA2</i>     | <i>SGCB</i>      | hsa-miR-579    | High miRNA   |
| <i>PDLIM5</i>   | <i>FZD3</i>      | hsa-miR-520e   | High miRNA   |
| <i>MYB</i>      | <i>RAB11FIP1</i> | hsa-miR-150    | High miRNA   |
| <i>SSR1</i>     | <i>SENP6</i>     | hsa-miR-802    | Low miRNA    |
| <i>MECP2</i>    | <i>PIP5K1C</i>   | hsa-miR-661    | Low miRNA    |
| <i>PPM1H</i>    | <i>PHLDB1</i>    | hsa-miR-661    | Low miRNA    |
| <i>APPBP2</i>   | <i>LPGAT1</i>    | hsa-miR-607    | Low miRNA    |
| <i>ZNF264</i>   | <i>HEG1</i>      | hsa-miR-372    | Low miRNA    |
| <i>KIF5C</i>    | <i>SEMA5A</i>    | hsa-miR-186    | Medium miRNA |
| <i>NOS1AP</i>   | <i>AAK1</i>      | hsa-miR-136    | High miRNA   |
| <i>APPL1</i>    | <i>OSBPL2</i>    | hsa-miR-607    | Low miRNA    |
| <i>MAP3K3</i>   | <i>PPM1H</i>     | hsa-miR-661    | Low miRNA    |
| <i>FAM134C</i>  | <i>DVL3</i>      | hsa-miR-485-5p | Low miRNA    |
| <i>PACS2</i>    | <i>RAB3IL1</i>   | hsa-miR-608    | Low miRNA    |
| <i>VASH1</i>    | <i>NOTCH2</i>    | hsa-miR-204    | High miRNA   |
| <i>TANC2</i>    | <i>ZNF654</i>    | hsa-miR-578    | Low miRNA    |
| <i>POLH</i>     | <i>RAB5B</i>     | hsa-miR-661    | Low miRNA    |
| <i>KCNS1</i>    | <i>KIAA0513</i>  | hsa-miR-326    | High miRNA   |
| <i>RAB14</i>    | <i>ASB1</i>      | hsa-miR-607    | Low miRNA    |
| <i>ZNF148</i>   | <i>GOLGA1</i>    | hsa-miR-522    | Low miRNA    |
| <i>ARHGAP5</i>  | <i>ZNF148</i>    | hsa-miR-607    | Low miRNA    |
| <i>OXR1</i>     | <i>ITGAV</i>     | hsa-miR-579    | High miRNA   |
| <i>GCN1L1</i>   | <i>RANBP2</i>    | hsa-miR-607    | Low miRNA    |
| <i>FBXO41</i>   | <i>AAK1</i>      | hsa-miR-326    | High miRNA   |
| <i>USP46</i>    | <i>TRIM33</i>    | hsa-miR-200c   | High miRNA   |
| <i>RAB7L1</i>   | <i>HIP1</i>      | hsa-miR-302d   | Low miRNA    |
| <i>PIP4K2B</i>  | <i>ARFRP1</i>    | hsa-miR-661    | Low miRNA    |
| <i>FUT1</i>     | <i>EPN3</i>      | hsa-miR-661    | Medium miRNA |
| <i>EIF2C1</i>   | <i>TSC1</i>      | hsa-miR-637    | Low miRNA    |

|                  |                  |                |              |
|------------------|------------------|----------------|--------------|
| <i>RAB11FIP2</i> | <i>CYP20A1</i>   | hsa-miR-577    | Low miRNA    |
| <i>SV2B</i>      | <i>ATP8A2</i>    | hsa-miR-495    | High miRNA   |
| <i>PFAS</i>      | <i>ELAVL1</i>    | hsa-miR-539    | Low miRNA    |
| <i>NT5DC3</i>    | <i>CRTC1</i>     | hsa-miR-612    | Low miRNA    |
| <i>TULP4</i>     | <i>TRAM2</i>     | hsa-miR-539    | Low miRNA    |
| <i>ZNF592</i>    | <i>HDAC5</i>     | hsa-miR-185    | High miRNA   |
| <i>PPM1H</i>     | <i>PPP1R16B</i>  | hsa-miR-661    | Low miRNA    |
| <i>TMED7</i>     | <i>EIF4E</i>     | hsa-miR-607    | Low miRNA    |
| <i>C1orf21</i>   | <i>EIF4B</i>     | hsa-miR-150    | Medium miRNA |
| <i>ATXN1</i>     | <i>CEP68</i>     | hsa-miR-204    | Medium miRNA |
| <i>PTGFR</i>     | <i>RUNX1T1</i>   | hsa-miR-495    | High miRNA   |
| <i>NPTXR</i>     | <i>NPTX1</i>     | hsa-miR-152    | Low miRNA    |
| <i>RAP2A</i>     | <i>ICK</i>       | hsa-miR-568    | Medium miRNA |
| <i>ALG9</i>      | <i>DCTN5</i>     | hsa-miR-612    | Low miRNA    |
| <i>CAND1</i>     | <i>PTCD3</i>     | hsa-miR-495    | Low miRNA    |
| <i>DLGAP2</i>    | <i>RAPGEFL1</i>  | hsa-miR-15b    | Low miRNA    |
| <i>CUL4B</i>     | <i>TBL1XR1</i>   | hsa-miR-579    | Low miRNA    |
| <i>TK2</i>       | <i>CFLAR</i>     | hsa-miR-552    | Low miRNA    |
| <i>TFE3</i>      | <i>TBC1D2B</i>   | hsa-miR-608    | Low miRNA    |
| <i>TMEM57</i>    | <i>KIDINS220</i> | hsa-miR-141    | High miRNA   |
| <i>HS2ST1</i>    | <i>PHACTR4</i>   | hsa-miR-520b   | Low miRNA    |
| <i>HECA</i>      | <i>DVL3</i>      | hsa-miR-559    | Low miRNA    |
| <i>MYT1L</i>     | <i>AAK1</i>      | hsa-miR-495    | High miRNA   |
| <i>SEMA5A</i>    | <i>GRIA3</i>     | hsa-miR-186    | Medium miRNA |
| <i>SLC39A9</i>   | <i>APOOL</i>     | hsa-miR-539    | Medium miRNA |
| <i>LRPPRC</i>    | <i>PAICS</i>     | hsa-miR-485-5p | Medium miRNA |
| <i>MAP3K3</i>    | <i>RAB5B</i>     | hsa-miR-661    | Low miRNA    |
| <i>PTPN14</i>    | <i>PAPPA</i>     | hsa-miR-497    | Low miRNA    |
| <i>SLC9A6</i>    | <i>TCF4</i>      | hsa-miR-142-5p | High miRNA   |
| <i>AGPS</i>      | <i>NRIP1</i>     | hsa-miR-656    | Low miRNA    |
| <i>MCFD2</i>     | <i>OSTM1</i>     | hsa-miR-200c   | High miRNA   |
| <i>CYB5B</i>     | <i>CREB1</i>     | hsa-miR-577    | Low miRNA    |
| <i>IQSEC3</i>    | <i>PTPRT</i>     | hsa-miR-608    | Low miRNA    |
| <i>CLDN1</i>     | <i>FGD6</i>      | hsa-miR-186    | Medium miRNA |
| <i>GRIK5</i>     | <i>DGAT1</i>     | hsa-miR-637    | Low miRNA    |
| <i>CIAO1</i>     | <i>SELT</i>      | hsa-miR-340    | Low miRNA    |

|                 |                  |                |              |
|-----------------|------------------|----------------|--------------|
| <i>KCTD3</i>    | <i>C14orf135</i> | hsa-miR-561    | Low miRNA    |
| <i>FAM8A1</i>   | <i>AKAP11</i>    | hsa-miR-519d   | Medium miRNA |
| <i>PAK6</i>     | <i>SLC7A8</i>    | hsa-miR-185    | Medium miRNA |
| <i>TEAD1</i>    | <i>ARHGEF12</i>  | hsa-miR-579    | High miRNA   |
| <i>OTUB2</i>    | <i>PTPN3</i>     | hsa-miR-16     | High miRNA   |
| <i>FZD3</i>     | <i>GOLPH3L</i>   | hsa-miR-539    | Low miRNA    |
| <i>PRPF4B</i>   | <i>KRIT1</i>     | hsa-miR-132    | High miRNA   |
| <i>RNF138</i>   | <i>CPNE3</i>     | hsa-miR-186    | Medium miRNA |
| <i>PRKCI</i>    | <i>KPNA1</i>     | hsa-miR-577    | Low miRNA    |
| <i>QKI</i>      | <i>SGPP1</i>     | hsa-miR-656    | Low miRNA    |
| <i>ACTR8</i>    | <i>LARP4</i>     | hsa-miR-607    | Low miRNA    |
| <i>TOMM70A</i>  | <i>FAM110B</i>   | hsa-miR-607    | Low miRNA    |
| <i>ENTPD7</i>   | <i>OTUB2</i>     | hsa-miR-424    | Low miRNA    |
| <i>CUL4B</i>    | <i>ANKFY1</i>    | hsa-miR-561    | Low miRNA    |
| <i>WNT4</i>     | <i>CACNA2D2</i>  | hsa-miR-637    | High miRNA   |
| <i>AFAP1</i>    | <i>PGPEP1</i>    | hsa-miR-204    | High miRNA   |
| <i>HELZ</i>     | <i>ZC3H11A</i>   | hsa-miR-186    | High miRNA   |
| <i>IQSEC3</i>   | <i>AAK1</i>      | hsa-miR-637    | Low miRNA    |
| <i>STEAP4</i>   | <i>OCN</i>       | hsa-miR-340    | Medium miRNA |
| <i>ICK</i>      | <i>C2orf3</i>    | hsa-miR-142-5p | High miRNA   |
| <i>STX1A</i>    | <i>SNCB</i>      | hsa-miR-663    | Low miRNA    |
| <i>SCAMP4</i>   | <i>SSBP3</i>     | hsa-miR-608    | Low miRNA    |
| <i>SH3TC2</i>   | <i>SH3PXD2A</i>  | hsa-miR-326    | High miRNA   |
| <i>EREG</i>     | <i>FGF7</i>      | hsa-miR-607    | High miRNA   |
| <i>LASP1</i>    | <i>MTDH</i>      | hsa-miR-150    | Medium miRNA |
| <i>PDXK</i>     | <i>TNS1</i>      | hsa-miR-608    | Low miRNA    |
| <i>SETD1B</i>   | <i>GOSR1</i>     | hsa-miR-326    | High miRNA   |
| <i>PNMA2</i>    | <i>TIAM1</i>     | hsa-miR-583    | Low miRNA    |
| <i>YWHAZ</i>    | <i>GPR107</i>    | hsa-miR-544    | Low miRNA    |
| <i>RHOQ</i>     | <i>LARP4</i>     | hsa-miR-559    | Low miRNA    |
| <i>KIAA0240</i> | <i>MARK2</i>     | hsa-miR-608    | Low miRNA    |
| <i>RAB22A</i>   | <i>CBFA2T2</i>   | hsa-miR-579    | High miRNA   |
| <i>COL4A4</i>   | <i>OCN</i>       | hsa-miR-340    | Medium miRNA |
| <i>RBM8A</i>    | <i>GPR107</i>    | hsa-miR-200c   | Low miRNA    |
| <i>CBLL1</i>    | <i>MAP3K2</i>    | hsa-miR-607    | Low miRNA    |
| <i>SLC25A22</i> | <i>TRIM3</i>     | hsa-miR-608    | Low miRNA    |

|                 |                 |                |              |
|-----------------|-----------------|----------------|--------------|
| <i>IRF4</i>     | <i>CCDC68</i>   | hsa-miR-384    | High miRNA   |
| <i>SLC12A3</i>  | <i>FSTL3</i>    | hsa-miR-485-5p | Medium miRNA |
| <i>B4GALT6</i>  | <i>ZNF238</i>   | hsa-miR-587    | Low miRNA    |
| <i>HIP1</i>     | <i>SLC35E1</i>  | hsa-miR-520b   | Low miRNA    |
| <i>CREB1</i>    | <i>FAM110B</i>  | hsa-miR-607    | Low miRNA    |
| <i>RAP2B</i>    | <i>SSR1</i>     | hsa-miR-656    | Low miRNA    |
| <i>SLC17A6</i>  | <i>SLC12A5</i>  | hsa-miR-25     | Low miRNA    |
| <i>EIF4E</i>    | <i>NDFIP1</i>   | hsa-miR-105    | Low miRNA    |
| <i>TCF4</i>     | <i>GJA1</i>     | hsa-miR-186    | Low miRNA    |
| <i>GCN1L1</i>   | <i>CHST3</i>    | hsa-miR-607    | Low miRNA    |
| <i>PTPRT</i>    | <i>AAK1</i>     | hsa-miR-1      | High miRNA   |
| <i>HELZ</i>     | <i>MECP2</i>    | hsa-miR-544    | Low miRNA    |
| <i>FTO</i>      | <i>MAP1B</i>    | hsa-miR-583    | Low miRNA    |
| <i>MYB</i>      | <i>PERP</i>     | hsa-miR-150    | High miRNA   |
| <i>UBE4B</i>    | <i>KPNA4</i>    | hsa-miR-607    | Low miRNA    |
| <i>DLGAP2</i>   | <i>CBX7</i>     | hsa-miR-181a   | High miRNA   |
| <i>NCDN</i>     | <i>KIAA1045</i> | hsa-miR-637    | Low miRNA    |
| <i>APPBP2</i>   | <i>ACTR8</i>    | hsa-miR-607    | Low miRNA    |
| <i>SV2B</i>     | <i>SCN3B</i>    | hsa-miR-485-5p | High miRNA   |
| <i>NCAM1</i>    | <i>APC</i>      | hsa-miR-561    | High miRNA   |
| <i>KIAA0513</i> | <i>CNNM1</i>    | hsa-miR-326    | High miRNA   |
| <i>BMPR2</i>    | <i>ZC3H11A</i>  | hsa-miR-186    | High miRNA   |
| <i>PPM1H</i>    | <i>TMOD2</i>    | hsa-miR-384    | Low miRNA    |
| <i>PACS2</i>    | <i>SSBP3</i>    | hsa-miR-608    | Low miRNA    |
| <i>PIP4K2B</i>  | <i>ZER1</i>     | hsa-miR-661    | Low miRNA    |
| <i>RAB11A</i>   | <i>FBXW2</i>    | hsa-miR-579    | Low miRNA    |
| <i>DLGAP2</i>   | <i>KIAA0319</i> | hsa-miR-570    | Low miRNA    |
| <i>SLC4A4</i>   | <i>SLC7A11</i>  | hsa-miR-570    | Low miRNA    |
| <i>PEX14</i>    | <i>S100PBP</i>  | hsa-miR-650    | High miRNA   |
| <i>TBL1XR1</i>  | <i>ZFH3</i>     | hsa-miR-570    | Low miRNA    |
| <i>PPM1H</i>    | <i>ENTPD1</i>   | hsa-miR-661    | Low miRNA    |
| <i>NRIP3</i>    | <i>AAK1</i>     | hsa-miR-485-5p | High miRNA   |
| <i>BICD2</i>    | <i>ZC3H11A</i>  | hsa-miR-186    | High miRNA   |
| <i>SSR1</i>     | <i>PDS5B</i>    | hsa-miR-603    | Low miRNA    |
| <i>LMO7</i>     | <i>OCLN</i>     | hsa-miR-340    | Medium miRNA |
| <i>GPM6B</i>    | <i>POU3F2</i>   | hsa-miR-579    | High miRNA   |

|                |                |                |              |
|----------------|----------------|----------------|--------------|
| <i>RBM12</i>   | <i>PEX19</i>   | hsa-miR-539    | Low miRNA    |
| <i>ASTN1</i>   | <i>LSAMP</i>   | hsa-miR-147    | High miRNA   |
| <i>SPTBN4</i>  | <i>CRTC1</i>   | hsa-miR-608    | Low miRNA    |
| <i>ATXN1</i>   | <i>RCOR1</i>   | hsa-miR-141    | Low miRNA    |
| <i>MAP3K3</i>  | <i>ZER1</i>    | hsa-miR-661    | Low miRNA    |
| <i>CACNG2</i>  | <i>SLC8A2</i>  | hsa-miR-608    | Low miRNA    |
| <i>FZR1</i>    | <i>UBTF</i>    | hsa-miR-608    | Low miRNA    |
| <i>PAX8</i>    | <i>ATP11A</i>  | hsa-miR-637    | High miRNA   |
| <i>RBM8A</i>   | <i>ARIH2</i>   | hsa-miR-200c   | Low miRNA    |
| <i>ENAH</i>    | <i>PBRM1</i>   | hsa-miR-607    | Low miRNA    |
| <i>HELZ</i>    | <i>ZNF24</i>   | hsa-miR-607    | Low miRNA    |
| <i>EIF2C1</i>  | <i>ARHGAP5</i> | hsa-miR-607    | Low miRNA    |
| <i>PCMI</i>    | <i>ETF1</i>    | hsa-miR-150    | Medium miRNA |
| <i>LIMCH1</i>  | <i>BACE1</i>   | hsa-miR-620    | Low miRNA    |
| <i>APPL1</i>   | <i>LARP4</i>   | hsa-miR-607    | Low miRNA    |
| <i>PCSK2</i>   | <i>C18orf1</i> | hsa-miR-203    | High miRNA   |
| <i>CLCN4</i>   | <i>AAK1</i>    | hsa-miR-629    | Low miRNA    |
| <i>SAR1B</i>   | <i>SMAD2</i>   | hsa-miR-656    | Low miRNA    |
| <i>LASP1</i>   | <i>CFLAR</i>   | hsa-miR-603    | Low miRNA    |
| <i>ZFHX3</i>   | <i>CYLD</i>    | hsa-miR-579    | Low miRNA    |
| <i>GABRA4</i>  | <i>DLGAP2</i>  | hsa-miR-181c   | Low miRNA    |
| <i>SYNJ2BP</i> | <i>HEG1</i>    | hsa-miR-520e   | Low miRNA    |
| <i>TNFSF15</i> | <i>SLC34A2</i> | hsa-miR-637    | Low miRNA    |
| <i>PRKAA1</i>  | <i>RAB8B</i>   | hsa-miR-559    | Low miRNA    |
| <i>ARNT2</i>   | <i>PMP2</i>    | hsa-miR-23b    | Medium miRNA |
| <i>ZBTB24</i>  | <i>LARP4</i>   | hsa-miR-603    | Low miRNA    |
| <i>ATXN1</i>   | <i>DNM3</i>    | hsa-miR-203    | High miRNA   |
| <i>TRIM29</i>  | <i>ATP2A3</i>  | hsa-miR-214    | Low miRNA    |
| <i>SMARCC2</i> | <i>LARP1</i>   | hsa-miR-150    | Medium miRNA |
| <i>KCTD2</i>   | <i>ATP2B4</i>  | hsa-miR-608    | Low miRNA    |
| <i>PTPRT</i>   | <i>PAIP2B</i>  | hsa-miR-203    | High miRNA   |
| <i>VGLL3</i>   | <i>OCN</i>     | hsa-miR-561    | Medium miRNA |
| <i>HEG1</i>    | <i>ATRNL1</i>  | hsa-miR-570    | Low miRNA    |
| <i>SH3TC2</i>  | <i>AAK1</i>    | hsa-miR-20b    | Low miRNA    |
| <i>IPO9</i>    | <i>PJA2</i>    | hsa-miR-579    | High miRNA   |
| <i>ELAVL2</i>  | <i>DLG2</i>    | hsa-miR-485-3p | High miRNA   |

|                  |                 |              |              |
|------------------|-----------------|--------------|--------------|
| <i>DUSP8</i>     | <i>BSN</i>      | hsa-miR-647  | Low miRNA    |
| <i>SNX19</i>     | <i>AKAP11</i>   | hsa-miR-607  | Low miRNA    |
| <i>BSN</i>       | <i>IQSEC3</i>   | hsa-miR-149  | High miRNA   |
| <i>ENTPD1</i>    | <i>ITGA4</i>    | hsa-miR-579  | Low miRNA    |
| <i>HIPK2</i>     | <i>TCF4</i>     | hsa-miR-557  | Low miRNA    |
| <i>CREB1</i>     | <i>SSR1</i>     | hsa-miR-520g | Low miRNA    |
| <i>YWHAZ</i>     | <i>SACMIL</i>   | hsa-miR-544  | Low miRNA    |
| <i>SBF1</i>      | <i>TFE3</i>     | hsa-miR-608  | Low miRNA    |
| <i>PGR</i>       | <i>THSD4</i>    | hsa-miR-570  | High miRNA   |
| <i>RAB11FIP2</i> | <i>RANBP2</i>   | hsa-miR-607  | Low miRNA    |
| <i>PPM1H</i>     | <i>AGPAT4</i>   | hsa-miR-607  | Low miRNA    |
| <i>IPO9</i>      | <i>MECP2</i>    | hsa-miR-599  | High miRNA   |
| <i>USP7</i>      | <i>EP400</i>    | hsa-miR-603  | Low miRNA    |
| <i>CREB1</i>     | <i>LPGAT1</i>   | hsa-miR-607  | Low miRNA    |
| <i>FOXO3</i>     | <i>ATRN</i>     | hsa-miR-570  | Low miRNA    |
| <i>ATRX</i>      | <i>PPP1R12A</i> | hsa-miR-607  | Low miRNA    |
| <i>CACNG2</i>    | <i>SV2B</i>     | hsa-miR-27b  | Medium miRNA |
| <i>EIF2C1</i>    | <i>GOSR1</i>    | hsa-miR-608  | Low miRNA    |
| <i>STXBP5L</i>   | <i>AAK1</i>     | hsa-miR-580  | Low miRNA    |
| <i>RANBP2</i>    | <i>LARP4</i>    | hsa-miR-607  | Low miRNA    |
| <i>SNX27</i>     | <i>PPP1R12A</i> | hsa-miR-607  | Low miRNA    |
| <i>GABRA1</i>    | <i>SLC1A2</i>   | hsa-miR-203  | High miRNA   |
| <i>KCTD2</i>     | <i>SCAMP4</i>   | hsa-miR-608  | Low miRNA    |
| <i>ERLIN2</i>    | <i>PHACTR2</i>  | hsa-miR-552  | Low miRNA    |
| <i>QKI</i>       | <i>ARNT2</i>    | hsa-miR-23a  | Medium miRNA |
| <i>ZNF652</i>    | <i>ITPR2</i>    | hsa-miR-135a | Medium miRNA |
| <i>CYB5B</i>     | <i>G3BP2</i>    | hsa-miR-577  | Low miRNA    |
| <i>ERLIN1</i>    | <i>ENTPD1</i>   | hsa-miR-421  | Medium miRNA |
| <i>PCMI</i>      | <i>ANKRD12</i>  | hsa-miR-150  | Medium miRNA |
| <i>PERP</i>      | <i>CORO2A</i>   | hsa-miR-150  | High miRNA   |
| <i>DLGAP2</i>    | <i>AAK1</i>     | hsa-miR-488  | High miRNA   |
| <i>TMCC1</i>     | <i>CAND1</i>    | hsa-miR-607  | Low miRNA    |
| <i>SH3TC2</i>    | <i>SH3PXD2A</i> | hsa-miR-608  | Low miRNA    |
| <i>STX11</i>     | <i>FMO2</i>     | hsa-miR-494  | Low miRNA    |
| <i>ITCH</i>      | <i>TOLLIP</i>   | hsa-miR-144  | Low miRNA    |
| <i>SRGAP3</i>    | <i>AAK1</i>     | hsa-miR-329  | High miRNA   |

|                |                |                |              |
|----------------|----------------|----------------|--------------|
| <i>UBTF</i>    | <i>HCFC1</i>   | hsa-miR-608    | Low miRNA    |
| <i>SEC63</i>   | <i>ZNF148</i>  | hsa-miR-186    | Medium miRNA |
| <i>ZEB1</i>    | <i>ATXN1</i>   | hsa-miR-203    | High miRNA   |
| <i>ATG9A</i>   | <i>CRTC1</i>   | hsa-miR-637    | Low miRNA    |
| <i>PGAP1</i>   | <i>S100PBP</i> | hsa-miR-583    | Low miRNA    |
| <i>HIP1</i>    | <i>ASB1</i>    | hsa-miR-302a   | Low miRNA    |
| <i>ANK3</i>    | <i>AAK1</i>    | hsa-miR-203    | High miRNA   |
| <i>HIP1</i>    | <i>FBXL18</i>  | hsa-miR-302d   | Low miRNA    |
| <i>RGS1</i>    | <i>ITGAV</i>   | hsa-miR-569    | Low miRNA    |
| <i>KLC2</i>    | <i>POLH</i>    | hsa-miR-661    | Low miRNA    |
| <i>CRTC1</i>   | <i>PPP2R4</i>  | hsa-miR-661    | Low miRNA    |
| <i>FGF2</i>    | <i>CALML4</i>  | hsa-miR-578    | Low miRNA    |
| <i>TEAD1</i>   | <i>MAP1B</i>   | hsa-miR-616    | High miRNA   |
| <i>TRPS1</i>   | <i>TNRC6B</i>  | hsa-miR-204    | High miRNA   |
| <i>CDS2</i>    | <i>SELT</i>    | hsa-miR-520g   | Low miRNA    |
| <i>C5orf28</i> | <i>TMEM33</i>  | hsa-miR-369-3p | Medium miRNA |
| <i>APPBP2</i>  | <i>SCAMP1</i>  | hsa-miR-561    | Low miRNA    |
| <i>CAB39</i>   | <i>METAP2</i>  | hsa-miR-384    | Low miRNA    |
| <i>MTMR9</i>   | <i>ICK</i>     | hsa-miR-568    | Medium miRNA |
| <i>SLC12A5</i> | <i>DLGAP2</i>  | hsa-miR-92b    | Low miRNA    |
| <i>ZNF592</i>  | <i>ARHGDI1</i> | hsa-miR-637    | Low miRNA    |
| <i>POLI</i>    | <i>HLTF</i>    | hsa-miR-410    | Low miRNA    |
| <i>ZNF264</i>  | <i>ATRNL1</i>  | hsa-miR-607    | Low miRNA    |
| <i>SEMA5A</i>  | <i>TEAD1</i>   | hsa-miR-616    | High miRNA   |
| <i>GSPT1</i>   | <i>RBBP4</i>   | hsa-miR-579    | Low miRNA    |
| <i>QKI</i>     | <i>SMCR7L</i>  | hsa-miR-200b   | Low miRNA    |
| <i>FGF2</i>    | <i>MAP3K2</i>  | hsa-miR-578    | Low miRNA    |
| <i>SMARCD1</i> | <i>PGPEP1</i>  | hsa-miR-515-5p | Low miRNA    |
| <i>OCN</i>     | <i>EHF</i>     | hsa-miR-607    | High miRNA   |
| <i>LBR</i>     | <i>ETV1</i>    | hsa-miR-340    | High miRNA   |
| <i>PCSK2</i>   | <i>RAB6B</i>   | hsa-miR-329    | High miRNA   |
| <i>THSD4</i>   | <i>MMP11</i>   | hsa-miR-661    | High miRNA   |
| <i>ZNF24</i>   | <i>PREPL</i>   | hsa-miR-607    | Low miRNA    |
| <i>KLHL2</i>   | <i>HLF</i>     | hsa-miR-520g   | Low miRNA    |
| <i>PLEKHB2</i> | <i>UBE2D1</i>  | hsa-miR-607    | Low miRNA    |
| <i>GCN1L1</i>  | <i>TGOLN2</i>  | hsa-miR-607    | Low miRNA    |



|                 |                 |                |              |
|-----------------|-----------------|----------------|--------------|
| <i>ATP6V1C1</i> | <i>MAP3K2</i>   | hsa-miR-607    | Low miRNA    |
| <i>PRPF4B</i>   | <i>FAM110B</i>  | hsa-miR-607    | Low miRNA    |
| <i>GRIN2A</i>   | <i>AAK1</i>     | hsa-miR-136    | High miRNA   |
| <i>APH1A</i>    | <i>CBX5</i>     | hsa-miR-539    | Low miRNA    |
| <i>IL6ST</i>    | <i>LSAMP</i>    | hsa-miR-136    | Medium miRNA |
| <i>CELSR2</i>   | <i>MNT</i>      | hsa-miR-608    | Low miRNA    |
| <i>TRAF6</i>    | <i>ITGB8</i>    | hsa-miR-607    | High miRNA   |
| <i>PRDM2</i>    | <i>CEP68</i>    | hsa-miR-211    | High miRNA   |
| <i>SEC14L5</i>  | <i>ADARB2</i>   | hsa-miR-326    | High miRNA   |
| <i>BMPR2</i>    | <i>8-Sep</i>    | hsa-miR-186    | Medium miRNA |
| <i>YWHAZ</i>    | <i>TNFAIP1</i>  | hsa-miR-544    | Low miRNA    |
| <i>SMAD3</i>    | <i>TNS1</i>     | hsa-miR-587    | Low miRNA    |
| <i>SH3TC2</i>   | <i>LDB3</i>     | hsa-miR-150    | Low miRNA    |
| <i>PCDH9</i>    | <i>PMP2</i>     | hsa-miR-587    | Medium miRNA |
| <i>VPS26A</i>   | <i>ETF1</i>     | hsa-miR-520h   | Low miRNA    |
| <i>CLIC5</i>    | <i>ADAMTSL3</i> | hsa-miR-340    | Medium miRNA |
| <i>PIGA</i>     | <i>SORT1</i>    | hsa-miR-587    | Low miRNA    |
| <i>FOXN3</i>    | <i>RCOR1</i>    | hsa-miR-141    | High miRNA   |
| <i>CCDC68</i>   | <i>FGF7</i>     | hsa-miR-340    | Medium miRNA |
| <i>TNPO1</i>    | <i>MIA3</i>     | hsa-miR-186    | Medium miRNA |
| <i>PTPRT</i>    | <i>PCLO</i>     | hsa-miR-203    | High miRNA   |
| <i>UBE2J1</i>   | <i>LBR</i>      | hsa-miR-607    | Low miRNA    |
| <i>NOS1AP</i>   | <i>PAIP2B</i>   | hsa-miR-329    | High miRNA   |
| <i>GSPT2</i>    | <i>MAP1B</i>    | hsa-miR-607    | High miRNA   |
| <i>FAM8A1</i>   | <i>SMAD2</i>    | hsa-miR-369-3p | Medium miRNA |
| <i>TRPS1</i>    | <i>TSC1</i>     | hsa-miR-204    | Medium miRNA |
| <i>RAB3B</i>    | <i>MCTP2</i>    | hsa-miR-105    | High miRNA   |
| <i>CCL22</i>    | <i>TRAF3</i>    | hsa-miR-661    | Medium miRNA |
| <i>GOSR1</i>    | <i>LASP1</i>    | hsa-miR-150    | Medium miRNA |
| <i>SV2B</i>     | <i>SLC1A2</i>   | hsa-miR-203    | High miRNA   |
| <i>TRPS1</i>    | <i>TMEM135</i>  | hsa-miR-641    | Low miRNA    |
| <i>C12orf5</i>  | <i>PLEKHB2</i>  | hsa-miR-20a    | Low miRNA    |
| <i>TRPS1</i>    | <i>TBL1X</i>    | hsa-miR-539    | Low miRNA    |
| <i>KCNS1</i>    | <i>AAK1</i>     | hsa-miR-326    | High miRNA   |
| <i>PIP4K2B</i>  | <i>PTPN18</i>   | hsa-miR-661    | Low miRNA    |
| <i>TEAD1</i>    | <i>CBX5</i>     | hsa-miR-570    | High miRNA   |

|                 |                 |                |              |
|-----------------|-----------------|----------------|--------------|
| <i>UBE4B</i>    | <i>LARP4</i>    | hsa-miR-607    | Low miRNA    |
| <i>ARL5A</i>    | <i>MCFD2</i>    | hsa-miR-200b   | High miRNA   |
| <i>ZNF652</i>   | <i>ARHGAP5</i>  | hsa-miR-607    | Low miRNA    |
| <i>CPT1A</i>    | <i>ATP8A1</i>   | hsa-miR-579    | High miRNA   |
| <i>TRPS1</i>    | <i>GOLPH3L</i>  | hsa-miR-539    | Low miRNA    |
| <i>GGCX</i>     | <i>KPNA1</i>    | hsa-miR-577    | Low miRNA    |
| <i>UBTF</i>     | <i>RAB3IL1</i>  | hsa-miR-608    | Low miRNA    |
| <i>SNPH</i>     | <i>SCN3B</i>    | hsa-miR-485-5p | High miRNA   |
| <i>MYT1L</i>    | <i>RIMBP2</i>   | hsa-miR-106a   | Low miRNA    |
| <i>ZNF24</i>    | <i>SLC7A11</i>  | hsa-miR-340    | Low miRNA    |
| <i>TJP1</i>     | <i>KCTD3</i>    | hsa-miR-561    | Low miRNA    |
| <i>SGK3</i>     | <i>FBXL18</i>   | hsa-miR-519d   | Low miRNA    |
| <i>TRPS1</i>    | <i>VASH1</i>    | hsa-miR-204    | High miRNA   |
| <i>IQSEC3</i>   | <i>AAK1</i>     | hsa-miR-625    | High miRNA   |
| <i>PDLIM5</i>   | <i>ANKRD12</i>  | hsa-miR-150    | Medium miRNA |
| <i>ZDHHC3</i>   | <i>DCP1A</i>    | hsa-miR-544    | Low miRNA    |
| <i>CBX5</i>     | <i>RHOBTB3</i>  | hsa-miR-381    | Low miRNA    |
| <i>POU4F2</i>   | <i>ONECUT2</i>  | hsa-miR-23a    | Low miRNA    |
| <i>MBNL3</i>    | <i>SLC7A2</i>   | hsa-miR-200a   | Medium miRNA |
| <i>REEP5</i>    | <i>GPR107</i>   | hsa-miR-587    | Low miRNA    |
| <i>PPM1F</i>    | <i>ENTPD1</i>   | hsa-miR-9      | Medium miRNA |
| <i>PRRG4</i>    | <i>PEX13</i>    | hsa-miR-302a   | High miRNA   |
| <i>EIF4EBP2</i> | <i>PTPN18</i>   | hsa-miR-34a    | High miRNA   |
| <i>SDC3</i>     | <i>RBM15B</i>   | hsa-miR-185    | High miRNA   |
| <i>SEC23IP</i>  | <i>SNX27</i>    | hsa-miR-607    | Low miRNA    |
| <i>ZNF667</i>   | <i>KIF1C</i>    | hsa-miR-520h   | Low miRNA    |
| <i>KIAA0408</i> | <i>ST8SIA3</i>  | hsa-miR-522    | Low miRNA    |
| <i>EPHA7</i>    | <i>GFRA1</i>    | hsa-miR-539    | Medium miRNA |
| <i>HCFC1</i>    | <i>ATP6V0A1</i> | hsa-miR-608    | Low miRNA    |
| <i>ZNF532</i>   | <i>RPS6KB1</i>  | hsa-miR-200c   | High miRNA   |
| <i>SNX27</i>    | <i>LPGAT1</i>   | hsa-miR-607    | Low miRNA    |
| <i>OCRL</i>     | <i>CLIP1</i>    | hsa-miR-570    | Low miRNA    |
| <i>C17orf63</i> | <i>PHF21A</i>   | hsa-miR-185    | High miRNA   |
| <i>PEG3</i>     | <i>OSBPL2</i>   | hsa-miR-607    | Low miRNA    |
| <i>DLGAP2</i>   | <i>RAPGEFL1</i> | hsa-miR-424    | Low miRNA    |
| <i>QKI</i>      | <i>EDNRB</i>    | hsa-miR-607    | High miRNA   |

|                  |                 |                |              |
|------------------|-----------------|----------------|--------------|
| <i>ZNF264</i>    | <i>PHACTR2</i>  | hsa-miR-603    | Low miRNA    |
| <i>PPM1F</i>     | <i>TFE3</i>     | hsa-miR-608    | Low miRNA    |
| <i>HELZ</i>      | <i>PIP5K1C</i>  | hsa-miR-608    | Low miRNA    |
| <i>CALML4</i>    | <i>C18orf1</i>  | hsa-miR-578    | Low miRNA    |
| <i>POU2AF1</i>   | <i>CD96</i>     | hsa-miR-485-5p | High miRNA   |
| <i>CEACAM5</i>   | <i>PTER</i>     | hsa-miR-607    | High miRNA   |
| <i>IQSEC3</i>    | <i>PRKAR1B</i>  | hsa-miR-150    | Medium miRNA |
| <i>EIF4E</i>     | <i>GGCX</i>     | hsa-miR-607    | Low miRNA    |
| <i>FGF2</i>      | <i>ZNF654</i>   | hsa-miR-578    | Low miRNA    |
| <i>GPM6A</i>     | <i>WASF3</i>    | hsa-miR-200c   | Medium miRNA |
| <i>PCSK2</i>     | <i>HTR2C</i>    | hsa-miR-203    | High miRNA   |
| <i>PREPL</i>     | <i>LPGAT1</i>   | hsa-miR-607    | Low miRNA    |
| <i>RAB3B</i>     | <i>ST8SIA3</i>  | hsa-miR-203    | Low miRNA    |
| <i>SLC6A8</i>    | <i>ARHGAP19</i> | hsa-miR-377    | Medium miRNA |
| <i>ARNT2</i>     | <i>TNPO1</i>    | hsa-miR-23a    | High miRNA   |
| <i>CYB5B</i>     | <i>HELZ</i>     | hsa-miR-577    | Low miRNA    |
| <i>GOSR1</i>     | <i>MAN2A2</i>   | hsa-miR-326    | Low miRNA    |
| <i>ICK</i>       | <i>FAM110B</i>  | hsa-miR-607    | Low miRNA    |
| <i>PTPRT</i>     | <i>CHD5</i>     | hsa-miR-149    | High miRNA   |
| <i>TBL1XR1</i>   | <i>ZEB2</i>     | hsa-miR-367    | Low miRNA    |
| <i>SMCHD1</i>    | <i>ATAD2</i>    | hsa-miR-340    | Low miRNA    |
| <i>NRIP1</i>     | <i>CAPRIN1</i>  | hsa-miR-656    | Low miRNA    |
| <i>RNF126</i>    | <i>RANBP3</i>   | hsa-miR-637    | Medium miRNA |
| <i>SCAMP4</i>    | <i>TXLNA</i>    | hsa-miR-608    | Low miRNA    |
| <i>AMMECR1</i>   | <i>GFPT1</i>    | hsa-miR-520h   | Low miRNA    |
| <i>CCNH</i>      | <i>MRPS10</i>   | hsa-miR-561    | Low miRNA    |
| <i>TK2</i>       | <i>DOLPP1</i>   | hsa-miR-326    | Low miRNA    |
| <i>MAP3K2</i>    | <i>GAB1</i>     | hsa-miR-20b    | High miRNA   |
| <i>SBF1</i>      | <i>TRIM3</i>    | hsa-miR-608    | Low miRNA    |
| <i>PELI1</i>     | <i>PLEKHB2</i>  | hsa-miR-607    | Low miRNA    |
| <i>KIDINS220</i> | <i>S100PBP</i>  | hsa-miR-200a   | High miRNA   |
| <i>HDAC2</i>     | <i>GTF2H5</i>   | hsa-miR-495    | Low miRNA    |
| <i>STEAP4</i>    | <i>CCRL1</i>    | hsa-miR-340    | Medium miRNA |
| <i>ATP6V0A1</i>  | <i>SH3GLB2</i>  | hsa-miR-608    | Low miRNA    |
| <i>ELAVL1</i>    | <i>UBE2G1</i>   | hsa-miR-539    | Low miRNA    |
| <i>SPCS3</i>     | <i>UBE2D1</i>   | hsa-miR-142-5p | High miRNA   |

|                |                  |                |              |
|----------------|------------------|----------------|--------------|
| <i>CACNG2</i>  | <i>AAK1</i>      | hsa-miR-204    | Medium miRNA |
| <i>TOMM70A</i> | <i>ACTR8</i>     | hsa-miR-607    | Low miRNA    |
| <i>STAT3</i>   | <i>PPP3CA</i>    | hsa-miR-495    | Low miRNA    |
| <i>SEC16A</i>  | <i>HEG1</i>      | hsa-miR-106b   | Medium miRNA |
| <i>SH3TC2</i>  | <i>ADARB2</i>    | hsa-miR-661    | Low miRNA    |
| <i>DSC3</i>    | <i>CHML</i>      | hsa-miR-200b   | Low miRNA    |
| <i>GIPC2</i>   | <i>CEACAM5</i>   | hsa-miR-607    | Low miRNA    |
| <i>GABRA1</i>  | <i>AAK1</i>      | hsa-miR-580    | Low miRNA    |
| <i>PPM1H</i>   | <i>ZNF592</i>    | hsa-miR-661    | Low miRNA    |
| <i>MBNL3</i>   | <i>G6PC</i>      | hsa-miR-607    | High miRNA   |
| <i>NCDN</i>    | <i>TRIM3</i>     | hsa-miR-608    | Low miRNA    |
| <i>AP2A2</i>   | <i>RAB11FIP3</i> | hsa-miR-661    | Low miRNA    |
| <i>NDST3</i>   | <i>ONECUT2</i>   | hsa-miR-579    | Medium miRNA |
| <i>CAMK2G</i>  | <i>NFIB</i>      | hsa-miR-495    | Low miRNA    |
| <i>SV2B</i>    | <i>RIMS3</i>     | hsa-miR-7      | High miRNA   |
| <i>SH3TC2</i>  | <i>ADARB2</i>    | hsa-miR-599    | Low miRNA    |
| <i>SLC7A8</i>  | <i>METTL7A</i>   | hsa-miR-766    | Low miRNA    |
| <i>CLDN8</i>   | <i>RAB3B</i>     | hsa-miR-579    | High miRNA   |
| <i>HELZ</i>    | <i>TMF1</i>      | hsa-miR-607    | Low miRNA    |
| <i>ENAH</i>    | <i>PTPN11</i>    | hsa-miR-607    | Low miRNA    |
| <i>RDX</i>     | <i>SSR1</i>      | hsa-miR-603    | Low miRNA    |
| <i>KIF3C</i>   | <i>FBXW2</i>     | hsa-miR-24     | High miRNA   |
| <i>RANBP10</i> | <i>ARIH2</i>     | hsa-miR-200c   | Low miRNA    |
| <i>HBS1L</i>   | <i>PELI2</i>     | hsa-miR-200c   | High miRNA   |
| <i>ENTPD1</i>  | <i>BDKRB2</i>    | hsa-miR-515-5p | Low miRNA    |
| <i>CCL22</i>   | <i>IL2RB</i>     | hsa-miR-34a    | Low miRNA    |
| <i>CUL4B</i>   | <i>PHKB</i>      | hsa-miR-579    | Low miRNA    |
| <i>GPR107</i>  | <i>ABI2</i>      | hsa-miR-544    | Low miRNA    |
| <i>CUL4A</i>   | <i>GFPT1</i>     | hsa-miR-520g   | Low miRNA    |
| <i>IPO9</i>    | <i>PURA</i>      | hsa-miR-106b   | Medium miRNA |
| <i>AP1S2</i>   | <i>CTNND2</i>    | hsa-miR-561    | High miRNA   |
| <i>MINA</i>    | <i>ZNF148</i>    | hsa-miR-577    | Low miRNA    |
| <i>RBM12</i>   | <i>CPSF6</i>     | hsa-miR-30d    | Low miRNA    |
| <i>SNX27</i>   | <i>HECA</i>      | hsa-miR-607    | Low miRNA    |
| <i>UBE4B</i>   | <i>APPL1</i>     | hsa-miR-607    | Low miRNA    |
| <i>AAK1</i>    | <i>RIMS1</i>     | hsa-miR-495    | High miRNA   |

|                 |                 |                |              |
|-----------------|-----------------|----------------|--------------|
| <i>SNX27</i>    | <i>LARP4</i>    | hsa-miR-607    | Low miRNA    |
| <i>NOS1AP</i>   | <i>CAMKV</i>    | hsa-miR-329    | High miRNA   |
| <i>HELZ</i>     | <i>SMARCA5</i>  | hsa-miR-561    | Low miRNA    |
| <i>RAB11A</i>   | <i>DPP8</i>     | hsa-miR-579    | Low miRNA    |
| <i>AGPS</i>     | <i>GFPT1</i>    | hsa-miR-520h   | Low miRNA    |
| <i>KCNC1</i>    | <i>PTPRT</i>    | hsa-miR-203    | High miRNA   |
| <i>RBM15B</i>   | <i>PGPEP1</i>   | hsa-miR-204    | High miRNA   |
| <i>SLC17A6</i>  | <i>MYT1L</i>    | hsa-miR-495    | High miRNA   |
| <i>SGPP1</i>    | <i>MAP3K2</i>   | hsa-miR-561    | Low miRNA    |
| <i>TFE3</i>     | <i>C18orf1</i>  | hsa-miR-608    | Low miRNA    |
| <i>PDE4B</i>    | <i>NCOA1</i>    | hsa-miR-369-3p | High miRNA   |
| <i>COL4A4</i>   | <i>ADAMTSL3</i> | hsa-miR-340    | Medium miRNA |
| <i>LRRC2</i>    | <i>PGPEP1</i>   | hsa-miR-302a   | Low miRNA    |
| <i>KCNC1</i>    | <i>MEF2C</i>    | hsa-miR-203    | High miRNA   |
| <i>P2RX1</i>    | <i>LAX1</i>     | hsa-miR-147    | High miRNA   |
| <i>KIF11</i>    | <i>GFPT1</i>    | hsa-miR-520h   | Low miRNA    |
| <i>CANX</i>     | <i>CPNE3</i>    | hsa-miR-186    | Medium miRNA |
| <i>SV2B</i>     | <i>CAMKK2</i>   | hsa-miR-7      | High miRNA   |
| <i>TMEM106B</i> | <i>RNF38</i>    | hsa-miR-802    | Low miRNA    |
| <i>ATP2B3</i>   | <i>GRIN2A</i>   | hsa-miR-105    | Low miRNA    |
| <i>TFE3</i>     | <i>RANBP3</i>   | hsa-miR-608    | Low miRNA    |
| <i>RBM15B</i>   | <i>NOTCH2</i>   | hsa-miR-204    | Medium miRNA |
| <i>ICK</i>      | <i>PRPF4B</i>   | hsa-miR-607    | Low miRNA    |
| <i>BAHD1</i>    | <i>SLC23A2</i>  | hsa-miR-326    | Low miRNA    |
| <i>PDE4B</i>    | <i>PMP2</i>     | hsa-miR-369-3p | High miRNA   |
| <i>BSN</i>      | <i>SLC17A7</i>  | hsa-miR-185    | High miRNA   |
| <i>FBXL7</i>    | <i>HGSNAT</i>   | hsa-miR-570    | Low miRNA    |
| <i>NLK</i>      | <i>AKAP11</i>   | hsa-miR-607    | High miRNA   |
| <i>RBM8A</i>    | <i>PRPF4B</i>   | hsa-miR-606    | Low miRNA    |
| <i>HCFC1</i>    | <i>MGRN1</i>    | hsa-miR-608    | Low miRNA    |
| <i>SLK</i>      | <i>PKD2</i>     | hsa-miR-607    | Low miRNA    |
| <i>GSPT1</i>    | <i>RAB1A</i>    | hsa-miR-579    | Low miRNA    |
| <i>SELT</i>     | <i>PFN2</i>     | hsa-miR-520h   | Low miRNA    |
| <i>AGPS</i>     | <i>DHTKD1</i>   | hsa-miR-520h   | Low miRNA    |
| <i>SSR1</i>     | <i>AKAP11</i>   | hsa-miR-603    | Low miRNA    |
| <i>C5orf22</i>  | <i>UBE2D1</i>   | hsa-miR-142-5p | High miRNA   |

|                 |                 |                |            |
|-----------------|-----------------|----------------|------------|
| <i>PRKCA</i>    | <i>SLC23A2</i>  | hsa-miR-326    | Low miRNA  |
| <i>SNX19</i>    | <i>FBXW2</i>    | hsa-miR-607    | Low miRNA  |
| <i>APPL1</i>    | <i>THRAP3</i>   | hsa-miR-579    | Low miRNA  |
| <i>TTC3</i>     | <i>CAND1</i>    | hsa-miR-607    | Low miRNA  |
| <i>CRNKL1</i>   | <i>TCF4</i>     | hsa-miR-410    | Low miRNA  |
| <i>RAB5A</i>    | <i>GOLPH3L</i>  | hsa-miR-539    | Low miRNA  |
| <i>NFYB</i>     | <i>LACTB2</i>   | hsa-miR-559    | Low miRNA  |
| <i>CYB5B</i>    | <i>KPNA1</i>    | hsa-miR-577    | Low miRNA  |
| <i>FOXN3</i>    | <i>TMEM57</i>   | hsa-miR-141    | High miRNA |
| <i>TMCC1</i>    | <i>RBBP4</i>    | hsa-miR-539    | Low miRNA  |
| <i>SMC1A</i>    | <i>STX17</i>    | hsa-miR-7      | Low miRNA  |
| <i>KIF1B</i>    | <i>KIF3A</i>    | hsa-miR-335    | Low miRNA  |
| <i>MAP4K4</i>   | <i>USP25</i>    | hsa-miR-559    | Low miRNA  |
| <i>KIAA0513</i> | <i>PARVA</i>    | hsa-miR-326    | Low miRNA  |
| <i>ZBTB6</i>    | <i>PIP4K2B</i>  | hsa-miR-105    | Low miRNA  |
| <i>ATP2B3</i>   | <i>KCNS1</i>    | hsa-miR-326    | High miRNA |
| <i>CBFB</i>     | <i>CCDC93</i>   | hsa-miR-559    | Low miRNA  |
| <i>NCDN</i>     | <i>FBXO41</i>   | hsa-miR-637    | Low miRNA  |
| <i>MECP2</i>    | <i>PPP1R12B</i> | hsa-miR-558    | Low miRNA  |
| <i>ENAH</i>     | <i>APPL1</i>    | hsa-miR-607    | Low miRNA  |
| <i>RAB6B</i>    | <i>CAMK2A</i>   | hsa-miR-485-5p | High miRNA |
| <i>OPA3</i>     | <i>PGPEP1</i>   | hsa-miR-302a   | Low miRNA  |
| <i>SLC7A11</i>  | <i>GJA1</i>     | hsa-miR-607    | Low miRNA  |
| <i>MECP2</i>    | <i>MGA</i>      | hsa-miR-593    | Low miRNA  |
| <i>PRPF4B</i>   | <i>TMF1</i>     | hsa-miR-607    | Low miRNA  |
| <i>CEP350</i>   | <i>ITGB8</i>    | hsa-miR-19a    | Low miRNA  |
| <i>BCLAF1</i>   | <i>PPP3CA</i>   | hsa-miR-495    | Low miRNA  |
| <i>THSD4</i>    | <i>KCNK15</i>   | hsa-miR-15b    | Low miRNA  |
| <i>TIGD6</i>    | <i>BMPRI1B</i>  | hsa-miR-607    | Low miRNA  |
| <i>SLC17A6</i>  | <i>DLGAP2</i>   | hsa-miR-363    | Low miRNA  |
| <i>ELAVL1</i>   | <i>ARHGAP5</i>  | hsa-miR-607    | Low miRNA  |
| <i>POGK</i>     | <i>LPGAT1</i>   | hsa-miR-607    | Low miRNA  |
| <i>C6orf211</i> | <i>SPG20</i>    | hsa-miR-384    | Low miRNA  |
| <i>SYP</i>      | <i>SLC25A22</i> | hsa-miR-608    | Low miRNA  |
| <i>ZNF592</i>   | <i>APPL1</i>    | hsa-miR-607    | Low miRNA  |
| <i>PAX8</i>     | <i>LRRRC15</i>  | hsa-miR-326    | High miRNA |

|                 |                  |                |              |
|-----------------|------------------|----------------|--------------|
| <i>CHML</i>     | <i>NPR3</i>      | hsa-miR-340    | Medium miRNA |
| <i>FMO2</i>     | <i>SLCO4C1</i>   | hsa-miR-340    | Medium miRNA |
| <i>TRPS1</i>    | <i>CNP</i>       | hsa-miR-204    | High miRNA   |
| <i>PAK2</i>     | <i>ZEB2</i>      | hsa-miR-369-3p | Medium miRNA |
| <i>TSPYL1</i>   | <i>GSPT1</i>     | hsa-miR-485-5p | Low miRNA    |
| <i>TMED7</i>    | <i>RNF138</i>    | hsa-miR-186    | Medium miRNA |
| <i>BSN</i>      | <i>SH3PXD2A</i>  | hsa-miR-149    | High miRNA   |
| <i>AAK1</i>     | <i>CACNB4</i>    | hsa-miR-539    | High miRNA   |
| <i>SLC7A2</i>   | <i>BRIP1</i>     | hsa-miR-27a    | High miRNA   |
| <i>GCNT2</i>    | <i>NPR3</i>      | hsa-miR-539    | Medium miRNA |
| <i>HELZ</i>     | <i>TXLNA</i>     | hsa-miR-646    | Low miRNA    |
| <i>PTPN14</i>   | <i>PAPPA</i>     | hsa-miR-195    | Low miRNA    |
| <i>CCL22</i>    | <i>IL2RB</i>     | hsa-miR-449b   | Medium miRNA |
| <i>SNX27</i>    | <i>RAB11FIP2</i> | hsa-miR-607    | Low miRNA    |
| <i>KCNJ12</i>   | <i>CCDC134</i>   | hsa-miR-125b   | High miRNA   |
| <i>CLIC5</i>    | <i>FGF18</i>     | hsa-miR-659    | High miRNA   |
| <i>SNX27</i>    | <i>GCNIL1</i>    | hsa-miR-607    | Low miRNA    |
| <i>TRPS1</i>    | <i>HIPK2</i>     | hsa-miR-204    | High miRNA   |
| <i>TNKS2</i>    | <i>GSPT1</i>     | hsa-miR-577    | Low miRNA    |
| <i>HIP1</i>     | <i>OPA3</i>      | hsa-miR-372    | Low miRNA    |
| <i>BSN</i>      | <i>CNNM1</i>     | hsa-miR-326    | High miRNA   |
| <i>PACS2</i>    | <i>TRIM3</i>     | hsa-miR-608    | Low miRNA    |
| <i>EIF4EBP2</i> | <i>MGAT1</i>     | hsa-miR-31     | High miRNA   |
| <i>SMG5</i>     | <i>SCAMP4</i>    | hsa-miR-608    | Low miRNA    |
| <i>VANGL1</i>   | <i>SLC7A8</i>    | hsa-miR-185    | Medium miRNA |
| <i>PRNP</i>     | <i>MAP3K2</i>    | hsa-miR-559    | Low miRNA    |
| <i>KIAA0513</i> | <i>ADARB2</i>    | hsa-miR-326    | High miRNA   |
| <i>KPNA4</i>    | <i>KIF1C</i>     | hsa-miR-512-5p | Low miRNA    |
| <i>PAFAH2</i>   | <i>METTL8</i>    | hsa-miR-520h   | Low miRNA    |
| <i>AGPAT5</i>   | <i>CAPRN1</i>    | hsa-miR-656    | Low miRNA    |
| <i>LIMS1</i>    | <i>CHST11</i>    | hsa-miR-142-5p | High miRNA   |
| <i>MECP2</i>    | <i>FOXO3</i>     | hsa-miR-593    | Low miRNA    |
| <i>LANCL1</i>   | <i>C18orf1</i>   | hsa-miR-204    | Medium miRNA |
| <i>NUBPL</i>    | <i>SERINC1</i>   | hsa-miR-607    | Low miRNA    |
| <i>MAP3K3</i>   | <i>HIF1AN</i>    | hsa-miR-661    | Low miRNA    |
| <i>MYNN</i>     | <i>C2orf3</i>    | hsa-miR-607    | Medium miRNA |

|                 |                  |              |              |
|-----------------|------------------|--------------|--------------|
| <i>DUSP8</i>    | <i>BSN</i>       | hsa-miR-185  | High miRNA   |
| <i>PIGK</i>     | <i>SERBP1</i>    | hsa-miR-410  | Low miRNA    |
| <i>TACC1</i>    | <i>LRPAP1</i>    | hsa-miR-641  | Low miRNA    |
| <i>KIAA0513</i> | <i>AAK1</i>      | hsa-miR-302a | Low miRNA    |
| <i>TGOLN2</i>   | <i>MTDH</i>      | hsa-miR-607  | Low miRNA    |
| <i>CDC42BPA</i> | <i>SOBP</i>      | hsa-miR-579  | High miRNA   |
| <i>SMARCD1</i>  | <i>SSBP3</i>     | hsa-miR-608  | Low miRNA    |
| <i>RAB22A</i>   | <i>ZMIZ1</i>     | hsa-miR-661  | Low miRNA    |
| <i>PTGER2</i>   | <i>FGF7</i>      | hsa-miR-607  | High miRNA   |
| <i>BSN</i>      | <i>AAK1</i>      | hsa-miR-647  | Low miRNA    |
| <i>ENAH</i>     | <i>OPA1</i>      | hsa-miR-607  | Low miRNA    |
| <i>ZNF264</i>   | <i>SH3BP2</i>    | hsa-miR-661  | Low miRNA    |
| <i>AAK1</i>     | <i>CNTNAP2</i>   | hsa-miR-302d | Low miRNA    |
| <i>PIP5K1C</i>  | <i>RAB11FIP3</i> | hsa-miR-661  | Low miRNA    |
| <i>MCTS1</i>    | <i>YIPF6</i>     | hsa-miR-410  | Low miRNA    |
| <i>DSC3</i>     | <i>FGD6</i>      | hsa-miR-656  | Medium miRNA |
| <i>UBTF</i>     | <i>ATP6V0A1</i>  | hsa-miR-608  | Low miRNA    |
| <i>ELAVL1</i>   | <i>PAICS</i>     | hsa-miR-539  | Low miRNA    |
| <i>TRAF3</i>    | <i>DSG3</i>      | hsa-miR-29c  | Low miRNA    |
| <i>SOSTDC1</i>  | <i>PRRG4</i>     | hsa-miR-561  | High miRNA   |
| <i>GNL3L</i>    | <i>CFLAR</i>     | hsa-miR-552  | Low miRNA    |
| <i>QKI</i>      | <i>APPL1</i>     | hsa-miR-607  | Low miRNA    |
| <i>KIAA0513</i> | <i>AAK1</i>      | hsa-miR-93   | Low miRNA    |
| <i>NHLH2</i>    | <i>ONECUT2</i>   | hsa-miR-340  | Low miRNA    |
| <i>COL4A4</i>   | <i>VGLL3</i>     | hsa-miR-23a  | High miRNA   |
| <i>FBXO41</i>   | <i>KIAA0556</i>  | hsa-miR-612  | High miRNA   |
| <i>KPNA4</i>    | <i>TJP1</i>      | hsa-miR-561  | Low miRNA    |
| <i>ATP2B3</i>   | <i>AAK1</i>      | hsa-miR-326  | High miRNA   |
| <i>KLK10</i>    | <i>CDH1</i>      | hsa-miR-612  | Medium miRNA |
| <i>DNAJC16</i>  | <i>LPGAT1</i>    | hsa-miR-559  | Low miRNA    |
| <i>CLCN4</i>    | <i>YTHDC1</i>    | hsa-miR-607  | Low miRNA    |
| <i>FBXO41</i>   | <i>FAIM2</i>     | hsa-miR-185  | High miRNA   |
| <i>MAPT</i>     | <i>HIPK2</i>     | hsa-miR-623  | Low miRNA    |
| <i>RAP2B</i>    | <i>ZMAT3</i>     | hsa-miR-603  | Low miRNA    |
| <i>PIP4K2B</i>  | <i>TJP1</i>      | hsa-miR-105  | Low miRNA    |
| <i>ATXN1</i>    | <i>HGSNAT</i>    | hsa-miR-204  | Medium miRNA |



|                 |                 |              |              |
|-----------------|-----------------|--------------|--------------|
| <i>PTPRT</i>    | <i>AAK1</i>     | hsa-miR-7    | High miRNA   |
| <i>STX11</i>    | <i>CLIC5</i>    | hsa-miR-539  | Medium miRNA |
| <i>TBC1D13</i>  | <i>PADI2</i>    | hsa-miR-326  | Low miRNA    |
| <i>DZIP3</i>    | <i>SLC7A11</i>  | hsa-miR-494  | High miRNA   |
| <i>RAD50</i>    | <i>TRPS1</i>    | hsa-miR-539  | Low miRNA    |
| <i>SNX27</i>    | <i>PTPN11</i>   | hsa-miR-607  | Low miRNA    |
| <i>SLC4A4</i>   | <i>ITIH5</i>    | hsa-miR-186  | Medium miRNA |
| <i>CUL4B</i>    | <i>ABI2</i>     | hsa-miR-579  | Low miRNA    |
| <i>RAB14</i>    | <i>MTDH</i>     | hsa-miR-607  | Low miRNA    |
| <i>SYNGR3</i>   | <i>AAK1</i>     | hsa-miR-185  | High miRNA   |
| <i>KIAA0232</i> | <i>TCF4</i>     | hsa-miR-557  | Low miRNA    |
| <i>RNF4</i>     | <i>MXI1</i>     | hsa-miR-495  | Low miRNA    |
| <i>SNX27</i>    | <i>RANBP2</i>   | hsa-miR-607  | Low miRNA    |
| <i>RTF1</i>     | <i>LARP4</i>    | hsa-miR-603  | Low miRNA    |
| <i>SH3TC2</i>   | <i>CLMN</i>     | hsa-miR-429  | Low miRNA    |
| <i>RBM8A</i>    | <i>JHDM1D</i>   | hsa-miR-606  | Low miRNA    |
| <i>GRIN2A</i>   | <i>AAK1</i>     | hsa-miR-629  | Low miRNA    |
| <i>SERBP1</i>   | <i>IMPACT</i>   | hsa-miR-495  | Low miRNA    |
| <i>ERO1LB</i>   | <i>NPR3</i>     | hsa-miR-494  | High miRNA   |
| <i>TJP1</i>     | <i>ASB1</i>     | hsa-miR-105  | Low miRNA    |
| <i>QKI</i>      | <i>SNX27</i>    | hsa-miR-488  | High miRNA   |
| <i>MXD4</i>     | <i>ACVR2B</i>   | hsa-miR-138  | High miRNA   |
| <i>TNPO1</i>    | <i>MID1</i>     | hsa-miR-186  | Medium miRNA |
| <i>RAB5A</i>    | <i>PRPF40A</i>  | hsa-miR-539  | Low miRNA    |
| <i>CACNB4</i>   | <i>ENC1</i>     | hsa-miR-539  | High miRNA   |
| <i>NFAT5</i>    | <i>ARHGEF12</i> | hsa-miR-579  | High miRNA   |
| <i>PRKACA</i>   | <i>TRIM3</i>    | hsa-miR-608  | Low miRNA    |
| <i>AGPAT5</i>   | <i>CTNND2</i>   | hsa-miR-561  | High miRNA   |
| <i>TRPS1</i>    | <i>NCOA3</i>    | hsa-miR-577  | Low miRNA    |
| <i>MRAS</i>     | <i>SYNJ1</i>    | hsa-miR-152  | High miRNA   |
| <i>ZNF532</i>   | <i>RPS6KB1</i>  | hsa-miR-200b | High miRNA   |
| <i>DYNC1LI2</i> | <i>TSC1</i>     | hsa-miR-130a | Medium miRNA |
| <i>CDC73</i>    | <i>MCFD2</i>    | hsa-miR-429  | Low miRNA    |
| <i>SSR1</i>     | <i>TMEM30A</i>  | hsa-miR-587  | Low miRNA    |
| <i>ZFP37</i>    | <i>UCHL5</i>    | hsa-miR-607  | Low miRNA    |
| <i>DLGAP2</i>   | <i>FBXW7</i>    | hsa-miR-92b  | Low miRNA    |

*SLC25A4*

*AGPAT5*

hsa-miR-552

High miRNA
