# Supplementary material for: Differential correlation analysis of glioblastoma reveals immune ceRNA interactions predictive of patient survival
Source: PubMed Central journal article supplement (PMC5330036; doi:10.1186/s12859-017-1557-4), 2017-02-28
Supplement: 12859_2017_1557_MOESM4_ESM.pdf [file 12859_2017_1557_MOESM4_ESM.pdf]

**Table S2. Top overrepresented ceRNAs in the core ceRNA network**

| <b>ceRNA</b>    | <b>Degree<br/>(percentage<sup>*</sup>)</b> | <b><i>P</i>-value<sup>**</sup></b> |
|-----------------|--------------------------------------------|------------------------------------|
| <i>AAK1</i>     | 89 (5.05%)                                 | 1.61E-47                           |
| <i>BSN</i>      | 34 (1.93%)                                 | 1.10E-32                           |
| <i>SV2B</i>     | 43 (2.44%)                                 | 8.05E-31                           |
| <i>SSBP3</i>    | 18 (1.02%)                                 | 2.43E-29                           |
| <i>YWHAZ</i>    | 13 (0.74%)                                 | 2.09E-24                           |
| <i>SNX27</i>    | 28 (1.59%)                                 | 2.31E-23                           |
| <i>SLC8A2</i>   | 20 (1.14%)                                 | 2.35E-22                           |
| <i>KIAA1045</i> | 21 (1.19%)                                 | 2.18E-20                           |
| <i>OSBPL2</i>   | 16 (0.91%)                                 | 1.03E-19                           |
| <i>NCDN</i>     | 16 (0.91%)                                 | 7.75E-19                           |

<sup>\*</sup>Percentages in the core network.

<sup>\*\*</sup>One-tailed Fisher's exact test *P*-value for overrepresentation.
