# Supplementary material for: Differential correlation analysis of glioblastoma reveals immune ceRNA interactions predictive of patient survival
Source: PubMed Central journal article supplement (PMC5330036; doi:10.1186/s12859-017-1557-4), 2017-02-28
Supplement: 12859_2017_1557_MOESM6_ESM.pdf [file 12859_2017_1557_MOESM6_ESM.pdf]

**Table S3. Top functional clusters of core ceRNAs**

| Category                                         | Term                                              | Num. ceRNAs | Fisher's exact <i>P</i> |
|--------------------------------------------------|---------------------------------------------------|-------------|-------------------------|
| <b>Cluster 1 (DAVID enrichment score = 6.13)</b> |                                                   |             |                         |
| GOTERM_CC_FAT                                    | GO:0044459: plasma membrane part                  | 206         | 1.47E-12                |
| GOTERM_CC_FAT                                    | GO:0005887: integral to plasma membrane           | 99          | 3.64E-04                |
| GOTERM_CC_FAT                                    | GO:0031226: intrinsic to plasma membrane          | 99          | 7.69E-04                |
| <b>Cluster 2 (DAVID enrichment score = 5.49)</b> |                                                   |             |                         |
| SP_PIR_KEYWORDS                                  | cell junction                                     | 51          | 1.31E-08                |
| GOTERM_CC_FAT                                    | GO:0030054: cell junction                         | 59          | 1.75E-06                |
| GOTERM_CC_FAT                                    | GO:0045202: synapse                               | 43          | 1.29E-05                |
| SP_PIR_KEYWORDS                                  | synapse                                           | 28          | 2.30E-05                |
| GOTERM_CC_FAT                                    | GO:0044456: synapse part                          | 32          | 5.26E-05                |
| <b>Cluster 3 (DAVID enrichment score = 5.18)</b> |                                                   |             |                         |
| GOTERM_CC_FAT                                    | GO:0031982: vesicle                               | 73          | 4.61E-07                |
| GOTERM_CC_FAT                                    | GO:0031410: cytoplasmic vesicle                   | 69          | 1.62E-06                |
| GOTERM_CC_FAT                                    | GO:0016023: cytoplasmic membrane-bounded vesicle  | 58          | 2.23E-05                |
| SP_PIR_KEYWORDS                                  | cytoplasmic vesicle                               | 30          | 2.47E-05                |
| GOTERM_CC_FAT                                    | GO:0031988: membrane-bounded vesicle              | 59          | 2.91E-05                |
| <b>Cluster 4 (DAVID enrichment score = 5.18)</b> |                                                   |             |                         |
| SP_PIR_KEYWORDS                                  | protein transport                                 | 60          | 1.98E-09                |
| GOTERM_BP_FAT                                    | GO:0045184: establishment of protein localization | 82          | 1.17E-06                |
| GOTERM_BP_FAT                                    | GO:0015031: protein transport                     | 81          | 1.60E-06                |
| GOTERM_BP_FAT                                    | GO:0008104: protein localization                  | 89          | 3.93E-06                |
| GOTERM_BP_FAT                                    | GO:0046907: intracellular transport               | 70          | 8.36E-06                |
| GOTERM_BP_FAT                                    | GO:0006886: intracellular protein transport       | 43          | 1.20E-04                |
| GOTERM_BP_FAT                                    | GO:0034613: cellular protein localization         | 44          | 4.63E-04                |
| GOTERM_BP_FAT                                    | GO:0070727: cellular macromolecule                | 44          | 5.39E-04                |

localization

**Cluster 5 (DAVID enrichment score = 4.03)**

|               |                                           |    |          |
|---------------|-------------------------------------------|----|----------|
| GOTERM_BP_FAT | GO:0019226: transmission of nerve impulse | 46 | 2.13E-06 |
| GOTERM_BP_FAT | GO:0007267: cell-cell signaling           | 66 | 5.69E-06 |
| GOTERM_BP_FAT | GO:0007268: synaptic transmission         | 39 | 1.58E-05 |
| GOTERM_BP_FAT | GO:0050877: neurological system process   | 78 | 0.41     |
