# Supplementary material for: Differential correlation analysis of glioblastoma reveals immune ceRNA interactions predictive of patient survival
Source: PubMed Central journal article supplement (PMC5330036; doi:10.1186/s12859-017-1557-4), 2017-02-28
Supplement: 12859_2017_1557_MOESM8_ESM.pdf [file 12859_2017_1557_MOESM8_ESM.pdf]

**Table S4. Prognostic ceRNA triplets**

| <b>ceRNA1</b> | <b>ceRNA2</b>  | <b>miRNA</b> | <b>Log-rank <math>P^*</math></b> | <b>Comparison</b>          |
|---------------|----------------|--------------|----------------------------------|----------------------------|
| <i>IRF4</i>   | <i>CCL22</i>   | hsa-miR-34a  | 1.92E-07                         | Low miRNA<br>vs. others    |
| <i>IRF4</i>   | <i>IL2RB</i>   | hsa-miR-34a  | 1.92E-07                         | Low miRNA<br>vs. others    |
| <i>CCL22</i>  | <i>IL2RB</i>   | hsa-miR-34a  | 1.92E-07                         | Low miRNA<br>vs. others    |
| <i>IRF4</i>   | <i>CLDN18</i>  | hsa-miR-34a  | 2.01E-05                         | Medium miRNA<br>vs. others |
| <i>MDM4</i>   | <i>PLEKHA6</i> | hsa-miR-622  | 5.32E-04                         | Medium miRNA<br>vs. others |

\*ceRNA triplets with log-rank  $P < 1E-3$
